# Supplementary material for: Ag(i)-catalyzed three-component radical cascade synthesis of 3-organoselenyl chromones from 2-methoxyaryl alkynones, Se powder and organic boronic acids
Source: Royal Society of Chemistry journal article supplement (doi:10.1039/d3nj04463g), 2023-01-01
Supplement: d3nj04463g1.pdf [file d3nj04463g1.pdf]

## Supporting Information

### **Ag(I)-catalyzed three-components radical cascade synthesis of 3-organoselenyl chromones from 2-methoxyaryl alkynones, Se powder and organic boronic acids under aerobic conditions**

Nan Sun,\* Zengguo Qiao, Xiaolong Liu, Zhi Qiao, Liquan Jin, and Xinquan Hu\*

*College of Chemical Engineering, Zhejiang University of Technology, Hangzhou 310032, Hangzhou  
310032, People's Republic of China*

*E-mail: [sunnan@zjut.edu.cn](mailto:sunnan@zjut.edu.cn) and [xinquan@zjut.edu.cn](mailto:xinquan@zjut.edu.cn)*

#### **Table of Contents**

|                                                                                                       |      |
|-------------------------------------------------------------------------------------------------------|------|
| 1. General remarks.....                                                                               | S-2  |
| 2. Syntheses of 3-organoselenyl chromones <b>3aa</b> and <b>3da</b> on a gram scale .....             | S-2  |
| 3. Combinatorial syntheses of 3-organoselenyl chromones.....                                          | S-3  |
| 4. Mechanism studies.....                                                                             | S-4  |
| 5. Characterization data for all synthesized 3-organoselenyl chromones.....                           | S-7  |
| 6. References.....                                                                                    | S-23 |
| 7. <sup>1</sup> H, <sup>13</sup> C, <sup>77</sup> Se and <sup>19</sup> F NMR spectra of products..... | S-24 |

## 1. General remarks

The  $^1\text{H}$ ,  $^{13}\text{C}$ ,  $^{77}\text{Se}$  and  $^{19}\text{F}$  NMR analyses were performed on a Bruker AVANCE III 500 MHz or 400 MHz spectrometer in deuterated solvents.  $^1\text{H}$ , and  $^{13}\text{C}$  NMR spectra were recorded with tetramethylsilane (TMS) as internal standard. The  $^{77}\text{Se}$  NMR spectra were recorded with diphenyl diselenide ( $\delta = 461$  ppm) as external standard. The  $^{19}\text{F}$  NMR spectra were recorded with  $\text{CFCl}_3$  ( $\delta = 0$  ppm) as external standard. Low-resolution mass analyses were performed on a Thermo Scientific TRACE ISQ GC-MS instrument in EI mode (70 eV). High resolution mass analyses of new products **3ag**, **3ah**, **3aj**, **3ak**, **3ap**, **3ea**, **3fa**, **3ga** and **3oa** were performed on an Agilent 6545 LC/Q-TOF mass spectrometer in positive ESI mode. Melting points (uncorrected) were determined on a BUCHI M-565 apparatus. Gas chromatography (GC) analyses were performed on a Shimadzu GC-2010 Plus instrument with FID detector using a Shimadzu SH-Rtx-5 capillary column (30 m x 0.32 mm (i.d.), 0.25  $\mu\text{m}$ ).

Reagents and solvents were purchased as reagent grade and were directly used without further purification. The reactants 2-methoxyaryl alkynones **1** were prepared according to literature methods.<sup>[1,2]</sup> Flash column chromatography were performed on silica gel (200-300 mesh) with petroleum ether/ethyl acetate as eluent.

## 2. Syntheses of 3-organoselenyl chromone **3aa** and **3da** on a gram scale

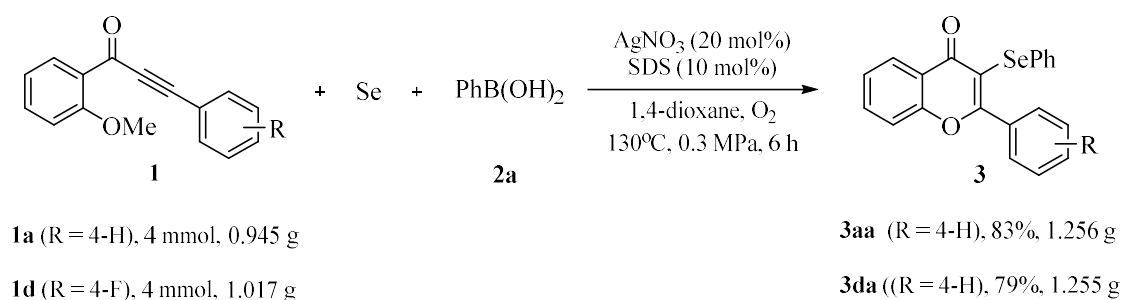

To a 110 mL of Teflon-lined stainless steel autoclave was added 1-(2-methoxy)phenyl-3-phenylprop-2-yn-1-one **1a** (4 mmol), Se powder (4.8 mmol), phenyl boronic acids **2a** (4.8 mmol),  $\text{AgNO}_3$  (0.8 mmol), SDS (0.4 mmol) and 1,4-dioxane (14 mL). The autoclave was then carefully closed, charged

with O<sub>2</sub> to 0.3 MPa and put into a preheated 130 °C oil bath for 6 h under stirring condition. After completing reaction, the autoclave was cooled to room temperature and carefully depressurized. The crude reaction mixture in the autoclave was poured into saturated ammonia water (100 mL) and extracted with CH<sub>2</sub>Cl<sub>2</sub> (3×100 mL). The extractions were combined, dried over anhydrous Na<sub>2</sub>SO<sub>4</sub>, filtrated and removed the solvent under reduced pressure. The residual was purified by flash chromatography on silica to afford 1.256 g of 2-phenyl-3-phenylselanyl-4*H*-chromen-4-one **3aa** in 83% yield.

After the reactant **1a** was changed with 1-(2-methoxy)phenyl-3-(4-fluoro)phenylprop-2-yn-1-one (**1d**) and through the same reaction procedure, 1.255 g of 2-(4-fluoro)phenyl-3-phenylselanyl-4*H*-chromen-4-one **3da** was isolated in 79% yield.

### 3. Combinatorial syntheses of 3-organoselenyl chromones

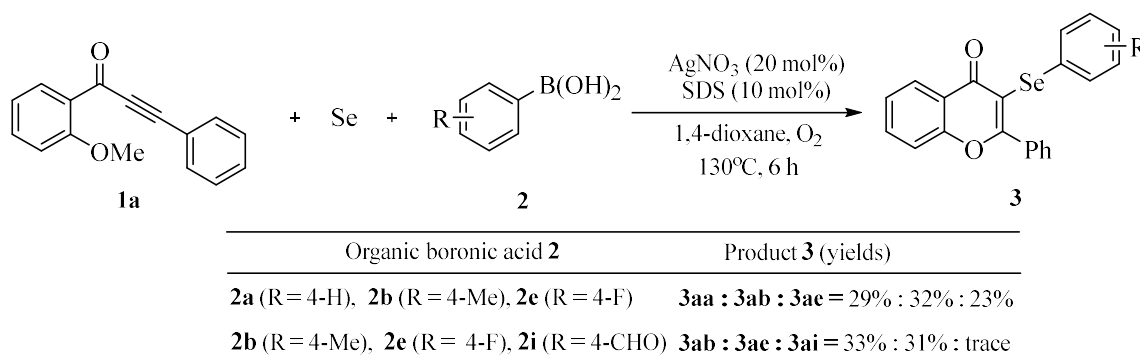

To a 30 mL of Teflon-lined stainless steel autoclave was added 1-(2-methoxy)phenyl-3-phenylprop-2-yn-1-one **1a** (0.6 mmol), Se powder (0.72 mmol), phenylboronic acid **2a** (0.24 mmol), 4-methylphenyl boronic acid **2b** (0.24 mmol), 4-fluorophenyl boronic acid **2e** (0.24 mmol), AgNO<sub>3</sub> (0.12 mmol), SDS (0.06 mmol) and 1,4-dioxane (2 mL). The autoclave was then carefully closed, charged with O<sub>2</sub> and put into a preheated 130 °C oil bath for 6 h under stirring condition. After completing reaction, the autoclave was cooled to room temperature and carefully depressurized. The crude reaction mixture in the autoclave was poured into saturated ammonia water (10 mL) and

extracted with CH<sub>2</sub>Cl<sub>2</sub> (2×10 mL). The extractions were combined, dried over anhydrous Na<sub>2</sub>SO<sub>4</sub>, filtrated and removed the solvent under reduced pressure. The residual was purified by flash chromatography on silica to afford 2-phenyl-3-phenylselanyl-4*H*-chromen-4-one **3aa**, 2-phenyl-3-(4-methyl)phenylselanyl-4*H*-chromen-4-one **3ab**, and 2-phenyl-3-(4-fluoro)phenylselanyl-4*H*-chromen-4-one **3ae** in 29%, 32% and 23% yields, respectively.

After the set of boronic acids **2a**, **2b** and **2e** was changed with equimole of 4-methylphenyl boronic acid **2b**, 4-fluorophenyl boronic acid **2e** and 4-formylphenyl boronic acid **2i** and through the same reaction procedure, 2-phenyl-3-(4-methyl)phenylselanyl-4*H*-chromen-4-one **3ab** and 2-phenyl-3-(4-fluoro)phenylselanyl-4*H*-chromen-4-one **3ae** were isolated in 33% and 31%, respectively. Only a trace amount of 3-(4-formyl)phenylselanyl-2-phenyl-4*H*-chromen-4-one **3ai** was observed in the reaction mixture.

#### 4. Mechanism studies

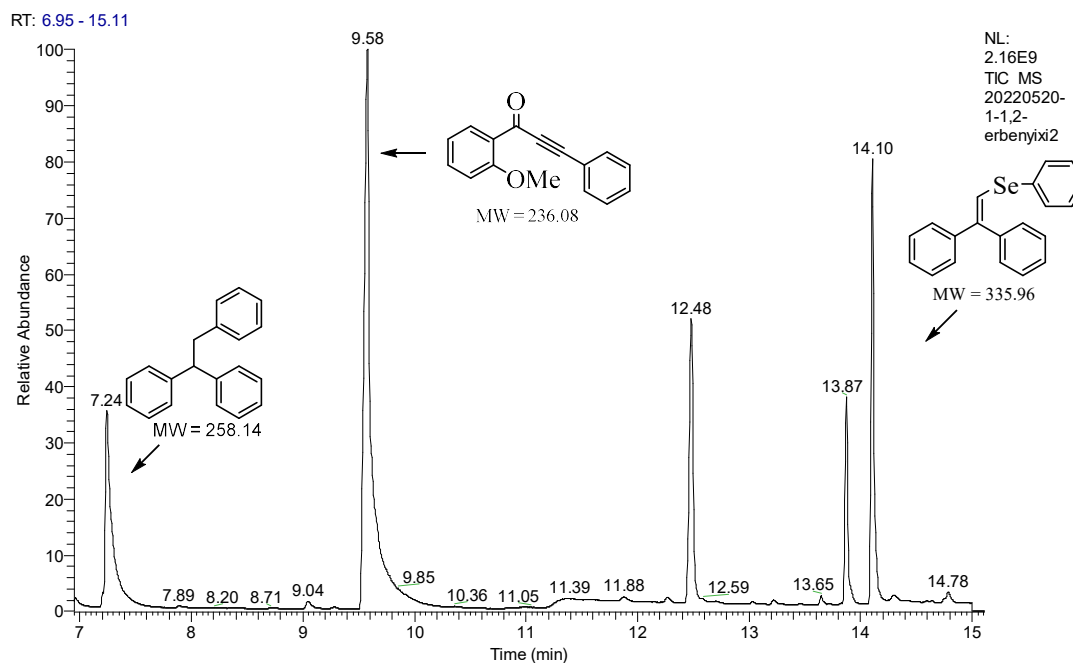

**Figure S1** GC chromatogram of the reaction mixture of 1-(2-methoxy)phenyl-3-phenylprop-2-yn-1-one (**1a**), Se powder and phenyl boronic acid (**1b**) in the presence of 1,1-diphenylethylene

20220520-1-1,2-erbenyxi2 #676 RT: 7.30 AV: 1 NL: 3.50E7  
T: {0.0} + c EI Full ms [50.00-500.00]

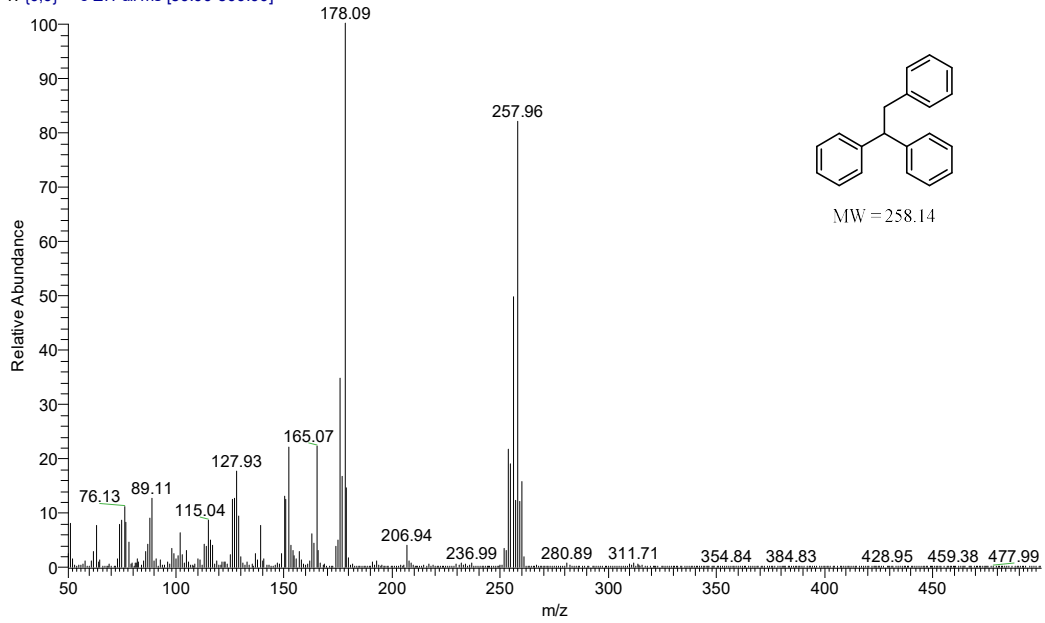

Figure S2 MS spectrum of the peak at 7.24 min

20220520-1-1,2-erbenyxi2 #2680 RT: 14.11 AV: 1 NL: 2.57E8  
T: {0.0} + c EI Full ms [50.00-500.00]

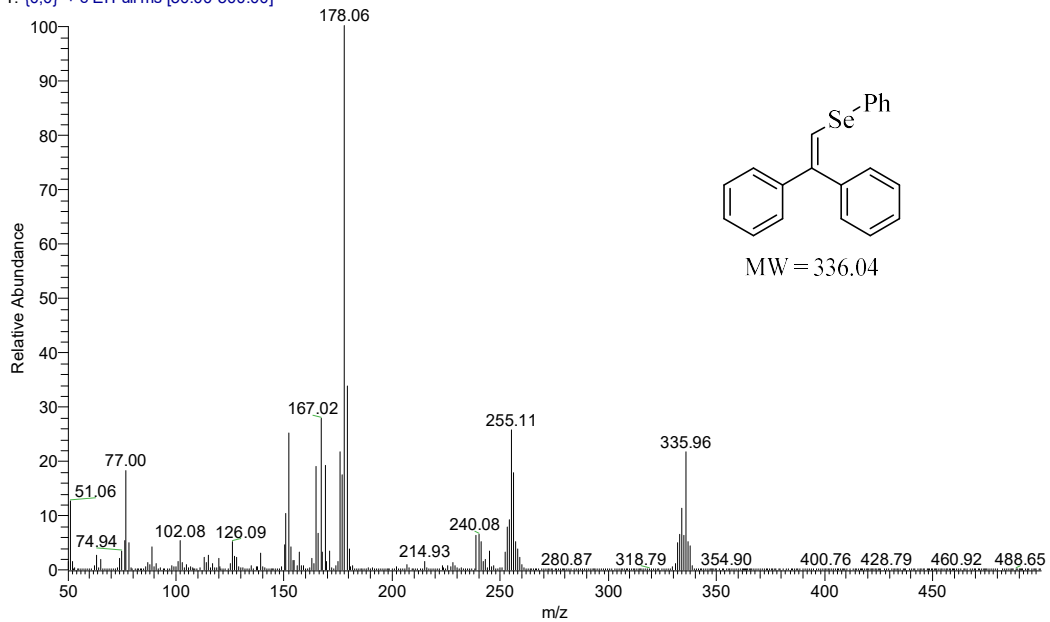

Figure S3 MS spectrum of the peak at 14.10 min

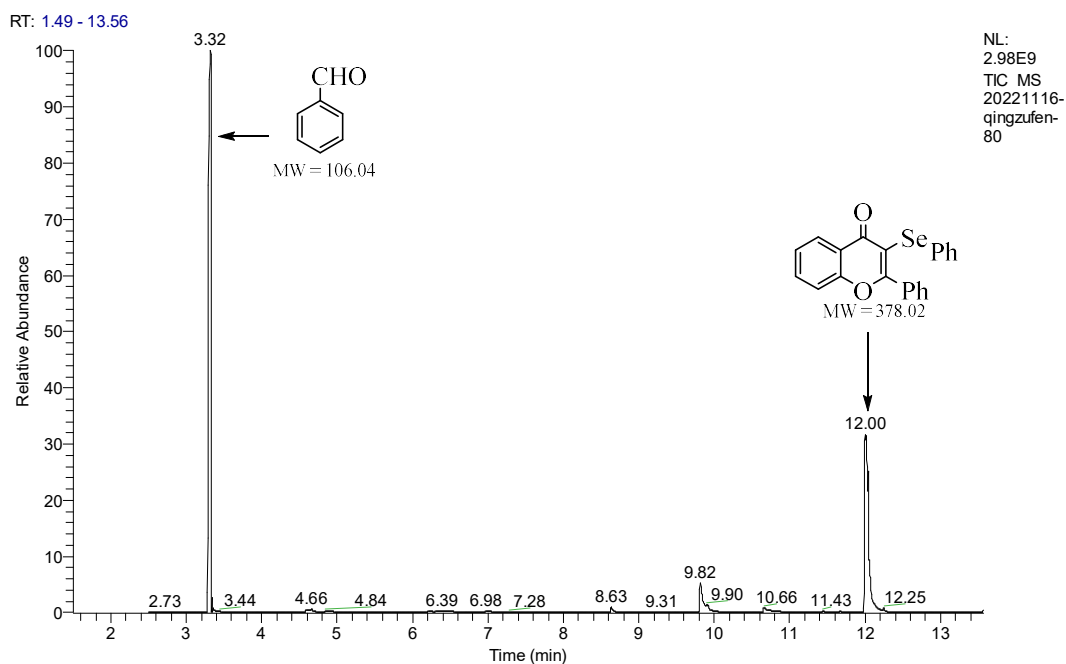

**Figure S4** GC chromatogram of the reaction mixture of 1-(2-benzyloxy)phenyl-3-phenylprop-2-yn-1-one (**1a'**), Se powder and phenyl boronic acid (**1b**)

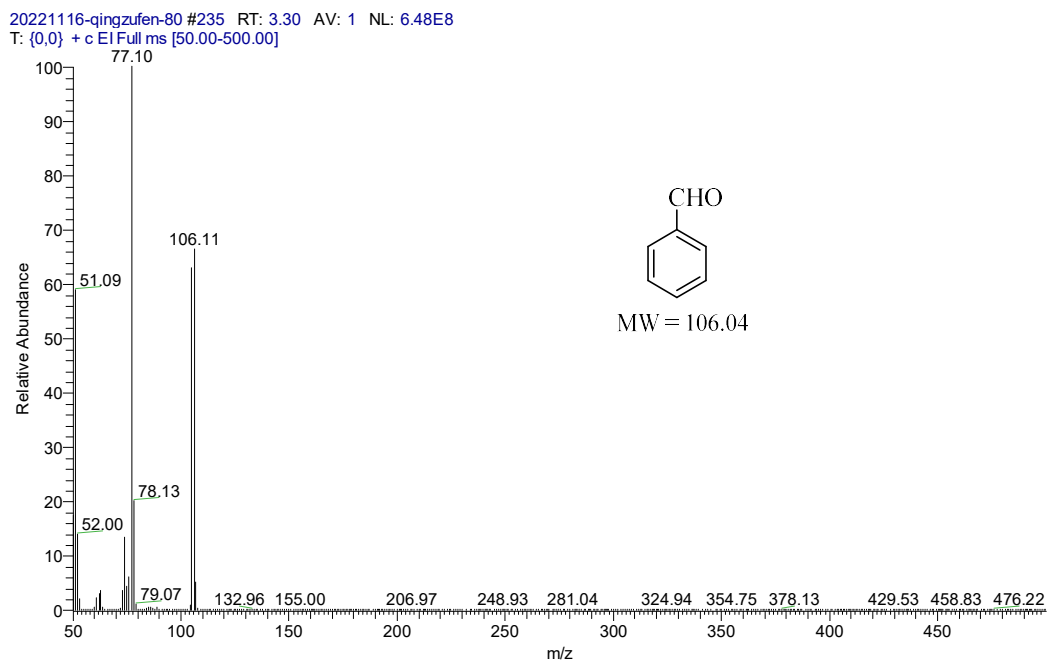

**Figure S5** MS spectrum of the peak at 3.32 min

## 5. Characterization data for all synthesized 3-organoselenyl chromones

**Note:** The synthesized 3-organoselenyl chromones including **3ag**, **3ah**, **3aj**, **3ak**, **3ap**, **3ea**, **3fa**, **3ga** and **3oa** in this paper are new compounds.

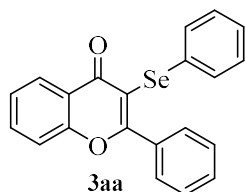

**2-Phenyl-3-phenylselenanyl-4H-chromen-4-one (3aa)** (CAS No.: 1332697-92-3): Flash column chromatography eluent (petroleum ether/ethyl acetate = 20:1); Yield: 89% (202 mg); Yellow solid; m.p. 130-132 °C (lit.<sup>[3]</sup> m.p.: 130-131 °C); <sup>1</sup>H NMR (CDCl<sub>3</sub>, 400 MHz): δ 8.27 (dd, *J* = 8.0, 1.7 Hz, 1H), 7.70-7.66 (m, 3H), 7.51-7.40 (m, 5H), 7.36-7.32 (m, 2H), 7.17-7.12 (m, 3H) ppm; <sup>13</sup>C NMR (CDCl<sub>3</sub>, 100 MHz): δ 175.99, 167.83, 156.00, 134.20, 134.04, 131.40, 131.04, 130.80, 129.29, 129.10, 128.04, 126.77, 126.70, 125.65, 122.43, 117.96, 114.12 ppm; <sup>77</sup>Se NMR (CDCl<sub>3</sub>, 95.5 MHz): δ 304.56 ppm. GC-MS (EI) m/z: 378 (M<sup>+</sup>, 60%), 376 (34), 178 (100).

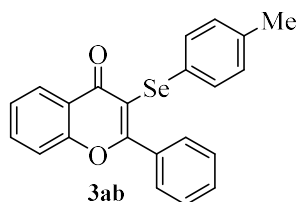

**2-Phenyl-3-(p-tolyl)selenanyl-4H-chromen-4-one (3ab)** (CAS No.: 1332697-96-7): Flash column chromatography eluent (petroleum ether/ethyl acetate = 20:1); Yield: 90% (212 mg); Yellow solid; m.p. 104-106 °C (lit.<sup>[4]</sup> m.p.: 104-106 °C). <sup>1</sup>H NMR (CDCl<sub>3</sub>, 400 MHz): δ 8.26 (dd, *J* = 8.0, 1.7 Hz, 1H), 7.71-7.63 (m, 3H), 7.53-7.39 (m, 5H), 7.28-7.25 (m, 2H), 6.98 (d, *J* = 8.0 Hz, 2H), 2.25 (s, 3H) ppm; <sup>13</sup>C NMR (CDCl<sub>3</sub>, 125 MHz): δ 176.04, 167.54, 155.98, 136.80, 134.29, 133.96, 131.62, 130.74, 129.89, 129.36, 128.01, 127.49, 126.69, 125.57, 122.47, 117.92, 114.50 ppm; <sup>77</sup>Se NMR (CDCl<sub>3</sub>, 95.5 MHz): δ 296.89 ppm. GC-MS (EI) m/z: 392 (M<sup>+</sup>, 57%), 390 (30), 105 (100).

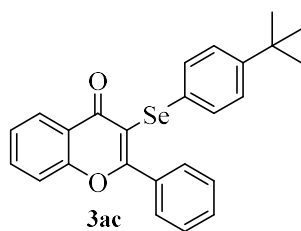

**3-(4-tert-Butyl)phenylselanyl-2-phenyl-4H-chromen-4-one (3ac)** (CAS No.: 2794102-70-6): Flash column chromatography eluent (petroleum ether/ethyl acetate = 20:1); Yield: 93% (241 mg); Yellow solid; m.p. 122-124 °C. <sup>1</sup>H NMR (CDCl<sub>3</sub>, 500 MHz): δ 8.24 (dd, *J* = 8.0, 1.7 Hz, 1H), 7.67-7.63 (m, 3H), 7.48-7.37 (m, 5H), 7.26-7.23 (m, 2H), 7.14 (dt, *J* = 8.5, 2.4 Hz, 2H), 1.22 (s, 9H) ppm; <sup>13</sup>C NMR (CDCl<sub>3</sub>, 125 MHz): δ 175.97, 167.35, 155.86, 149.80, 134.13, 133.80, 131.17, 130.51, 129.21, 127.84, 127.36, 126.56, 126.01, 125.42, 122.28, 117.77, 114.37, 34.30, 31.12 ppm; <sup>77</sup>Se NMR (CDCl<sub>3</sub>, 95.5 MHz): δ 294.21 ppm. GC-MS (EI) m/z: 434 (M<sup>+</sup>, 26%), 432 (12), 207 (100).

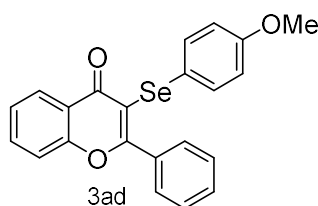

**3-(4-Methoxyphenyl)selanyl-2-phenyl-4H-chromen-4-one (3ad)** (CAS No.: 2794102-72-8): Flash column chromatography eluent (petroleum ether/ethyl acetate = 15:1); Yield: 71% (174 mg); Yellow oil. <sup>1</sup>H NMR (CDCl<sub>3</sub>, 500 MHz): δ 8.24 (dd, *J* = 8.0, 1.7 Hz, 1H), 7.68-7.62 (m, 3H), 7.52-7.37 (m, 5H), 7.32 (dt, *J* = 8.9, 3 Hz, 2H), 6.69 (dt, *J* = 3.9, 3.1 Hz, 2H), 3.70 (s, 3H) ppm; <sup>13</sup>C NMR (CDCl<sub>3</sub>, 125 MHz): δ 176.15, 167.11, 159.21, 155.94, 134.41, 134.31, 133.89, 130.66, 129.39, 128.01, 126.62, 125.49, 122.48, 121.02, 117.90, 115.29, 114.71, 55.22 ppm; <sup>77</sup>Se NMR (CDCl<sub>3</sub>, 95.5 MHz): δ 290.28 ppm. GC-MS (EI) m/z: 408 (M<sup>+</sup>, 21%), 406 (11), 165 (100).



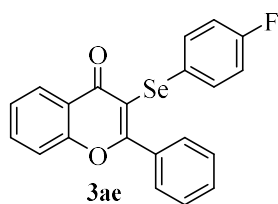

**3-(4-Fluorophenyl)selanyl-2-phenyl-4H-chromen-4-one (3ae)** (CAS No.: 1332697-93-4): Flash column chromatography eluent (petroleum ether/ethyl acetate = 20:1); Yield: 91% (216 mg); Yellow solid; m.p. 138-139 °C (lit.<sup>[3]</sup> m.p.: 138-139 °C). <sup>1</sup>H NMR (CDCl<sub>3</sub>, 400 MHz): δ 8.24 (dd, *J* = 8.0, 1.6 Hz, 1H), 7.70-7.64 (m, 3H), 7.53-7.40 (m, 5H), 7.32 (dd, *J* = 8.5, 5.5 Hz, 2H), 6.86-6.80 (m, 2H) ppm; <sup>13</sup>C NMR (CDCl<sub>3</sub>, 125 MHz): δ 175.97, 167.46, 162.19 (d, *J*<sub>CF</sub> = 245.0 Hz), 155.96, 134.11, 134.05, 134.06, 134.03, 133.96, 128.68 (d, *J*<sub>CF</sub> = 150.0 Hz), 126.61, 125.66, 125.53 (d, *J*<sub>CF</sub> = 2.5 Hz), 122.40, 117.95, 116.14 (d, *J*<sub>CF</sub> = 21.3 Hz), 114.71 ppm; <sup>77</sup>Se NMR (CDCl<sub>3</sub>, 95.5 MHz): δ 299.48 (d, *J* = 3.8 Hz) ppm; <sup>19</sup>F NMR (CDCl<sub>3</sub>, 376.3 MHz) δ -104.93 ppm. GC-MS (EI) m/z: 396 (M<sup>+</sup>, 24%), 394 (12), 105 (100).

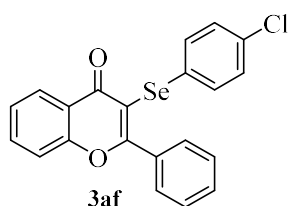

**3-(4-Chlorophenyl)selanyl-2-phenyl-4H-chromen-4-one (3af)** (CAS No.: 1332697-94-5): Flash column chromatography eluent (petroleum ether/ethyl acetate = 15:1); Yield: 70% (173 mg); Yellow solid; m.p. 180-182 °C (lit.<sup>[3]</sup> m.p.: 180-181 °C). <sup>1</sup>H NMR (CDCl<sub>3</sub>, 400 MHz): δ 8.17 (dd, *J* = 8.0, 1.7 Hz, 1H), 7.64-7.56 (m, 3H), 7.46-7.34 (m, 5H), 7.17 (dt, *J* = 8.5, 2.7 Hz, 2H), 7.02 (dt, *J* = 8.5, 2.7 Hz, 2H) ppm; <sup>13</sup>C NMR (CDCl<sub>3</sub>, 100 MHz): δ 174.84, 166.81, 154.94, 133.10, 132.99, 131.92, 131.49, 129.89, 128.40, 128.19, 128.14, 127.07, 125.66, 124.72, 121.32, 116.93, 11.95 ppm; <sup>77</sup>Se NMR (CDCl<sub>3</sub>, 95.5 MHz): δ 304.67 ppm. GC-MS (EI) m/z: 412 (M<sup>+</sup>, 14%), 414 (M+2, 6), 410 (6), 105 (100).

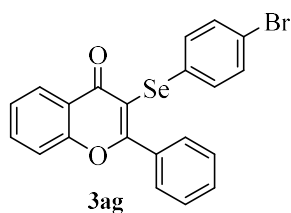

**3-(4-Bromophenyl)selanyl-2-phenyl-4H-chromen-4-one (3ag):** Flash column chromatography eluent (petroleum ether/ethyl acetate = 15:1); Yield: 65% (178 mg); Yellow solid; m.p. 177-180 °C. <sup>1</sup>H NMR (CDCl<sub>3</sub>, 400 MHz): δ 8.16 (dd, *J* = 8.0, 1.7 Hz, 1H), 7.64-7.55 (m, 3H), 7.45-7.34 (m, 5H), 7.17 (dt, *J* = 8.6, 2.6 Hz, 2H), 7.10 (dt, *J* = 8.6, 2.4 Hz, 2H) ppm; <sup>13</sup>C NMR (CDCl<sub>3</sub>, 100 MHz): δ 174.80, 166.87, 154.93, 133.11, 132.97, 131.65, 131.05, 129.91, 129.16, 128.18, 127.07, 125.65, 124.73, 121.31, 119.92, 116.93, 112.79 ppm; <sup>77</sup>Se NMR (CDCl<sub>3</sub>, 95.5 MHz): δ 305.24 ppm. HRMS (+ESI) *m/z*: [M + H<sup>+</sup>] calculated for C<sub>21</sub>H<sub>14</sub>BrO<sub>2</sub>Se<sup>+</sup> 456.9337, found 456.9340.

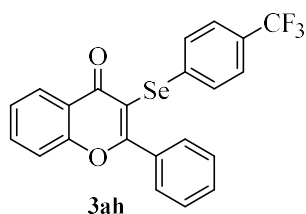

**2-Phenyl-3-(4-(trifluoromethyl)phenyl)selanyl-4H-chromen-4-one (3ah):** Flash column chromatography eluent (petroleum ether/ethyl acetate = 15:1); Yield: 79% (210 mg); Yellow solid; m.p. 195-198 °C. <sup>1</sup>H NMR (CDCl<sub>3</sub>, 500 MHz): δ 8.26 (dd, *J* = 8.0, 1.7 Hz, 1H), 7.74-7.66 (m, 3H), 7.53-7.44 (m, 5H), 7.39 (s, 4H) ppm; <sup>13</sup>C NMR (CDCl<sub>3</sub>, 125 MHz): δ 175.66, 168.40, 156.02, 136.73, 134.27, 133.89, 131.06, 130.08, 129.14, 128.60 (q, *J*<sub>CF</sub> = 32.5 Hz), 128.15, 126.71, 125.89, 125.80 (q, *J*<sub>CF</sub> = 3.8 Hz), 124.10 (q, *J*<sub>CF</sub> = 270.0 Hz), 122.32, 118.01, 113.02 ppm; <sup>77</sup>Se NMR (CDCl<sub>3</sub>, 95.5 MHz): δ 316.54 ppm; <sup>19</sup>F NMR (376.3 MHz, CDCl<sub>3</sub>) δ -62.55 ppm. HRMS (+ESI) *m/z*: [M + H<sup>+</sup>] calculated for C<sub>22</sub>H<sub>14</sub>F<sub>3</sub>O<sub>2</sub>Se<sup>+</sup> 447.0106, found 447.0110.

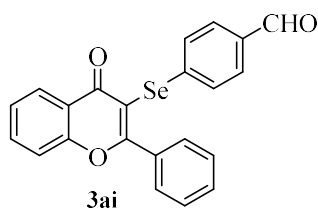

**3-(4-Formylphenyl)selanyl-2-phenyl-4H-chromen-4-one (3ai)** (CAS No.: 2794102-65-9): Flash column chromatography eluent (petroleum ether/ethyl acetate = 10:1); Yield: 70% (171 mg); Yellow solid; m.p. 169-172 °C. <sup>1</sup>H NMR (CDCl<sub>3</sub>, 400 MHz): δ 9.88 (s, 1H), 8.27 (dd, *J* = 8.0, 1.7 Hz, 1H), 7.77-7.73 (m, 1H), 7.69-7.64 (m, 4H), 7.54 (d, *J* = 8.2 Hz, 1H), 7.52-7.40 (m, 6H) ppm; <sup>13</sup>C NMR (CDCl<sub>3</sub>, 100 MHz): δ 191.46, 175.59, 168.71, 156.04, 141.35, 134.41, 134.38, 133.82, 131.19, 130.16, 129.38, 129.12, 128.20, 126.79, 126.00, 122.30, 118.05, 112.47 ppm; <sup>77</sup>Se NMR (CDCl<sub>3</sub>, 95.5 MHz): δ 325.52 ppm. GC-MS (EI) *m/z*: 406 (M<sup>+</sup>, 56%), 404 (30), 105 (100).

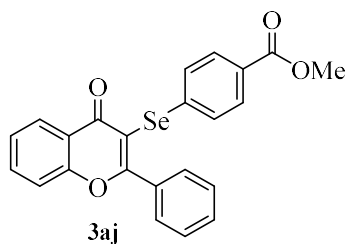

**3-((4-Methoxycarbonyl)phenyl)selanyl-2-phenyl-4H-chromen-4-one (3aj)**: Flash column chromatography eluent (petroleum ether/ethyl acetate = 5:1); Yield: 61% (159 mg); Yellow solid; m.p. 168-171 °C. <sup>1</sup>H NMR (CDCl<sub>3</sub>, 500 MHz): δ 8.20 (dd, *J* = 8.0, 1.7 Hz, 1H), 7.77 (dt, *J* = 8.5, 2.1 Hz, 2H), 7.68-7.64 (m, 3H), 7.47 (d, *J* = 7.6 Hz, 1H), 7.45-4.37 (m, 4H), 7.30 (dt, *J* = 8.5, 2.2 Hz, 2H), 3.80 (s, 3H) ppm; <sup>13</sup>C NMR (CDCl<sub>3</sub>, 125 MHz): δ 175.27, 168.14, 166.37, 155.67, 138.49, 133.97, 133.58, 130.75, 129.76, 128.96, 128.90, 128.85, 127.81, 127.73, 126.32, 125.56, 121.98, 117.73, 112.51, 51.72 ppm; <sup>77</sup>Se NMR (CDCl<sub>3</sub>, 95.5 MHz): δ 318.14 ppm. HRMS (+ESI) *m/z*: [M + H<sup>+</sup>] calculated for C<sub>23</sub>H<sub>17</sub>O<sub>4</sub>Se<sup>+</sup> 437.0287, found 437.0290.

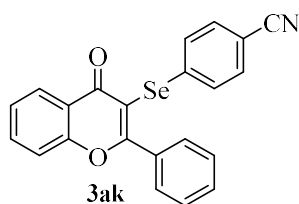

**3-(4-Cyanophenyl)selenanyl-2-phenyl-4H-chromen-4-one (3ak):** Flash column chromatography eluent (petroleum ether/ethyl acetate = 5:1); Yield: 52% (125 mg); Yellow solid; m.p. 178-181 °C. <sup>1</sup>H NMR (CDCl<sub>3</sub>, 500 MHz): δ 8.25 (dd, *J* = 8.0, 1.6 Hz, 1H), 7.76-7.73 (m, 1H), 7.67-7.65 (m, 2H), 7.55-7.44 (m, 5H), 7.41 (dt, *J* = 8.6, 1.7 Hz, 2H), 7.35 (dt, *J* = 8.6, 1.7 Hz, 2H) ppm; <sup>13</sup>C NMR (CDCl<sub>3</sub>, 125 MHz): δ 175.39, 168.64, 155.93, 139.18, 134.35, 133.63, 132.26, 131.16, 129.74, 129.02, 128.15, 126.63, 125.97, 122.17, 118.68, 117.97, 112.34, 109.65 ppm; <sup>77</sup>Se NMR (CDCl<sub>3</sub>, 95.5 MHz): δ 328.60 ppm. HRMS (+ESI) *m/z*: [M + H<sup>+</sup>] calculated for C<sub>22</sub>H<sub>14</sub>NO<sub>2</sub>Se<sup>+</sup> 404.0184, found 404.0186.

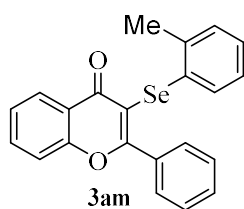

**2-Phenyl-3-(o-tolyl)selenanyl-4H-chromen-4-one (3am)** (CAS No.: 1332697-97-8): Flash column chromatography eluent (petroleum ether/ethyl acetate = 20:1); Yield: 76% (179 mg); Yellow oil. <sup>1</sup>H NMR (CDCl<sub>3</sub>, 400 MHz): δ 8.28 (dd, *J* = 8.0, 1.7 Hz, 1H), 7.73-7.66 (m, 3H), 7.52-7.41 (m, 5H), 7.15 (d, *J* = 7.3 Hz, 1H), 7.10-7.04 (m, 2H), 6.98-6.94 (m, 1H), 2.32 (s, 3H) ppm; <sup>13</sup>C NMR (CDCl<sub>3</sub>, 100 MHz): δ 176.04, 168.01, 156.04, 137.73, 134.17, 134.08, 132.30, 130.84, 130.08, 129.97, 129.17, 128.04, 126.77, 126.65, 126.58, 125.70, 122.33, 117.98, 113.43, 21.81 ppm; <sup>77</sup>Se NMR (CDCl<sub>3</sub>, 95.5 MHz): δ 270.62 ppm. GC-MS (EI) *m/z*: 392 (M<sup>+</sup>, 4%), 390 (2), 91 (100).

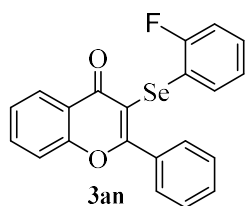

**3-(2-Fluorophenyl)selanyl-2-phenyl-4H-chromen-4-one (3an)** (CAS No.: 2794102-62-6): Flash column chromatography eluent (petroleum ether/ethyl acetate = 20:1); Yield: 68% (162 mg); Yellow oil.  $^1\text{H}$  NMR ( $\text{CDCl}_3$ , 500 MHz):  $\delta$  8.24 (dd,  $J = 8.0, 1.7$  Hz, 1H), 7.70-7.66 (m, 3H), 7.50-7.46 (m, 2H), 7.45-7.40 (m, 3H), 7.25-7.22 (m, 1H), 7.14-7.09 (m, 1H), 6.94-6.90 (m, 2H) ppm;  $^{13}\text{C}$  NMR ( $\text{CDCl}_3$ , 125 MHz):  $\delta$  175.77, 167.66, 160.79 (d,  $J_{\text{CF}} = 241.3$  Hz), 156.00, 134.13, 133.91, 132.30 (d,  $J_{\text{CF}} = 2.5$  Hz), 130.91, 129.15, 128.58 (d,  $J_{\text{CF}} = 7.5$  Hz), 128.10, 126.60, 125.73, 124.79 (d,  $J_{\text{CF}} = 2.5$  Hz), 122.20, 117.98, 117.97 (d,  $J_{\text{CF}} = 22.5$  Hz), 115.37 (d,  $J_{\text{CF}} = 22.5$  Hz), 112.31 ppm;  $^{77}\text{Se}$  NMR ( $\text{CDCl}_3$ , 95.5 MHz):  $\delta$  250.21 (d,  $J = 16.2$  Hz) ppm;  $^{19}\text{F}$  NMR ( $\text{CDCl}_3$ , 376.3 MHz)  $\delta$  -114.60 ppm. GC-MS (EI)  $m/z$ : 396 ( $\text{M}^+$ , 18%), 394 (10), 196 (100).

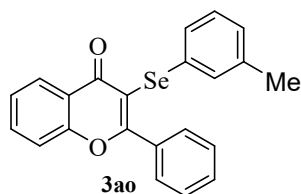

**2-Phenyl-3-(m-tolyl)selanyl-4H-chromen-4-one (3ao)** (CAS No.: 2794102-68-2): Flash column chromatography eluent (petroleum ether/ethyl acetate = 20:1); Yield: 74% (174 mg); Yellow oil.  $^1\text{H}$  NMR ( $\text{CDCl}_3$ , 500 MHz):  $\delta$  8.27 (dd,  $J = 8.0, 1.7$  Hz, 1H), 7.71-7.66 (m, 3H), 7.51-7.40 (m, 5H), 7.15-7.12 (m, 2H), 7.04 (t,  $J = 7.6$  Hz, 1H), 6.95 (d,  $J = 8.0$  Hz, 1H), 2.23 (s, 3H) ppm;  $^{13}\text{C}$  NMR ( $\text{CDCl}_3$ , 125 MHz):  $\delta$  176.02, 167.64, 156.00, 138.76, 134.22, 134.00, 131.71, 131.10, 130.73, 129.31, 128.91, 128.08, 128.01, 127.70, 126.72, 125.61, 122.43, 117.96, 114.22, 22.72 ppm;  $^{77}\text{Se}$  NMR ( $\text{CDCl}_3$ , 95.5 MHz):  $\delta$  302.91 ppm. GC-MS (EI)  $m/z$ : 392 ( $\text{M}^+$ , 50%), 390 (26), 165 (100).

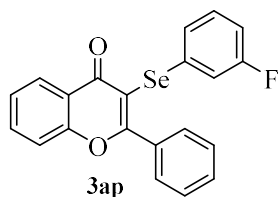

**3-(3-Fluorophenyl)selanyl-2-phenyl-4H-chromen-4-one (3ap):** Flash column chromatography eluent (petroleum ether/ethyl acetate = 20:1); Yield: 51% (121 mg); Yellow oil.  $^1\text{H}$  NMR ( $\text{CDCl}_3$ , 500 MHz):  $\delta$  8.24 (dd,  $J = 8.0, 1.7$  Hz, 1H), 7.69-7.65 (m, 3H), 7.50-7.39 (m, 5H), 7.12-7.07 (m, 2H), 7.02-6.99 (m, 1H), 6.84-6.78 (m, 1H) ppm;  $^{13}\text{C}$  NMR ( $\text{CDCl}_3$ , 125 MHz):  $\delta$  175.73, 168.16, 162.72 (d,  $J_{\text{CF}} = 247.5$  Hz), 155.98, 134.21, 133.96, 133.33 (d,  $J_{\text{CF}} = 7.5$  Hz), 130.99, 130.31 (d,  $J_{\text{CF}} = 7.5$  Hz), 129.23, 128.12, 126.64, 126.18 (d,  $J_{\text{CF}} = 2.5$  Hz), 125.80, 122.34, 118.02, 117.44 (d,  $J_{\text{CF}} = 22.5$  Hz), 113.68 (d,  $J_{\text{CF}} = 21.3$  Hz), 113.49 ppm;  $^{77}\text{Se}$  NMR ( $\text{CDCl}_3$ , 95.5 MHz):  $\delta$  315.62 ppm;  $^{19}\text{F}$  NMR ( $\text{CDCl}_3$ , 376.3 MHz)  $\delta$  -111.70 ppm. HRMS (+ESI)  $m/z$ :  $[\text{M} + \text{H}^+]$  calculated for  $\text{C}_{21}\text{H}_{14}\text{FO}_2\text{Se}^+$  397.0138, found 397.0139.

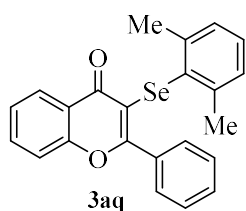

**3-(2,6-Dimethylphenyl)selanyl-2-phenyl-4H-chromen-4-one (3aq)** (CAS No.: 2794102-74-0): Flash column chromatography eluent (petroleum ether/ethyl acetate = 20:1); Yield: 86% (209 mg); Yellow solid; m.p. 149-153 °C.  $^1\text{H}$  NMR ( $\text{CDCl}_3$ , 500 MHz):  $\delta$  8.21 (dd,  $J = 8.1, 1.7$  Hz, 1H), 7.65-7.62 (m, 1H), 7.56-7.53 (m, 2H), 7.48-7.36 (m, 5H), 7.00-6.97 (m, 1H), 6.90 (d,  $J = 7.5$  Hz, 2H), 2.35 (s, 6H) ppm;  $^{13}\text{C}$  NMR ( $\text{CDCl}_3$ , 125 MHz):  $\delta$  179.95, 164.47, 155.87, 142.26, 133.94, 133.68, 131.30, 130.49, 128.85, 128.04, 127.92, 127.59, 126.50, 125.30, 121.93, 117.82, 115.52, 24.17 ppm;  $^{77}\text{Se}$  NMR ( $\text{CDCl}_3$ , 95.5 MHz):  $\delta$  217.88 ppm. GC-MS (EI)  $m/z$ : 406 ( $\text{M}^+$ , 2%), 404 (1), 105 (100).

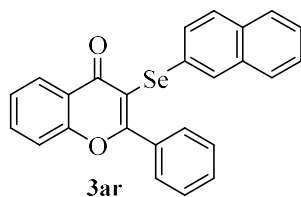

**3-(Naphthalen-2-yl)selanyl-2-phenyl-4H-chromen-4-one (3ar)** (CAS No.: 2890224-90-3): Flash column chromatography eluent (petroleum ether/ethyl acetate = 20:1); Yield: 87% (223 mg); Yellow solid; m.p. 109-112 °C (lit.<sup>[6]</sup> m.p.: 94-95 °C). <sup>1</sup>H NMR (CDCl<sub>3</sub>, 500 MHz): δ 8.29 (dd, *J* = 8.0, 1.7 Hz, 1H), 7.79 (d, *J* = 7.8 Hz, 1H), 7.75-7.62 (m, 6H), 7.50 (d, *J* = 8.5 Hz, 1H), 7.48-7.38 (m, 7H) ppm; <sup>13</sup>C NMR (CDCl<sub>3</sub>, 125 MHz): δ 180.85, 172.66, 160.81, 138.93, 138.82, 138.69, 136.97, 135.58, 134.57, 134.06, 133.63, 133.55, 133.28, 132.80, 132.49, 132.07, 131.53, 131.07, 130.61, 130.45, 127.23, 122.74, 118.91 ppm; <sup>77</sup>Se NMR (CDCl<sub>3</sub>, 95.5 MHz): δ 307.64 ppm. GC-MS (EI) m/z: 428 (M<sup>+</sup>, 26%), 426 (13), 105 (100).

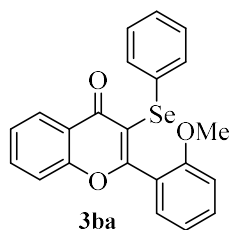

**2-(2-Methoxy)phenyl-3-phenylselanyl-4H-chromen-4-one (3ba)** (CAS No.: 1332698-04-0): Flash column chromatography eluent (petroleum ether/ethyl acetate = 15:1); Yield: 75% (183 mg); Yellow oil. <sup>1</sup>H NMR (CDCl<sub>3</sub>, 400 MHz): δ 8.27 (dd, *J* = 8.0, 1.7 Hz, 1H), 7.68-7.63 (m, 1H), 7.49-7.32 (m, 6H), 7.16-7.11 (m, 3H), 7.05 (td, *J* = 7.5, 1.0 Hz, 1H), 6.96 (d, *J* = 8.5 Hz, 1H), 3.71 (s, 3.71 Hz, 3H) ppm; <sup>13</sup>C NMR (CDCl<sub>3</sub>, 100 MHz): δ 175.65, 166.28, 156.83, 156.42, 133.84, 132.06, 131.38, 131.19, 129.89, 128.86, 126.66, 126.62, 125.47, 123.76, 122.73, 120.27, 118.11, 116.51, 111.10, 55.43 ppm; <sup>77</sup>Se NMR (CDCl<sub>3</sub>, 95.5 MHz): δ 308.26 ppm. GC-MS (EI) m/z: 408 (M<sup>+</sup>, 20%), 406 (10), 77 (100).

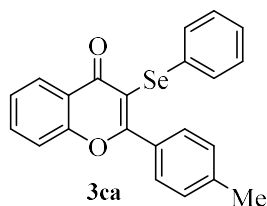

**3-Phenylselanyl-2-p-tolyl-4H-chromen-4-one (3ca)** (CAS No.: 1332698-00-6): Flash column chromatography eluent (petroleum ether/ethyl acetate = 20:1); Yield: 90% (211 mg); Yellow solid; m.p. 108-111 °C (lit.<sup>[3]</sup> m.p.: 99-100 °C). <sup>1</sup>H NMR (CDCl<sub>3</sub>, 500 MHz): δ 8.26 (dd, *J* = 8.1, 1.7 Hz, 1H), 7.67-7.64 (m, 1H), 7.61 (dt, *J* = 8.2, 2.1 Hz, 2H), 7.47 (dd, *J* = 8.5, 1.0 Hz, 1H), 7.41-7.34 (m, 3H), 7.25 (d, *J* = 7.6 Hz, 2H), 7.19-7.12 (m, 3H), 2.42 (s, 3H) ppm; <sup>13</sup>C NMR (CDCl<sub>3</sub>, 125 MHz): δ 175.99, 168.10, 155.97, 141.31, 133.99, 131.60, 131.37, 130.82, 129.33, 129.10, 128.73, 126.69, 126.66, 125.58, 122.41, 117.95, 113.58, 21.62 ppm; <sup>77</sup>Se NMR (CDCl<sub>3</sub>, 95.5 MHz): δ 304.50 ppm. GC-MS (EI) m/z: 392 (M<sup>+</sup>, 21%), 390 (11), 119 (100).

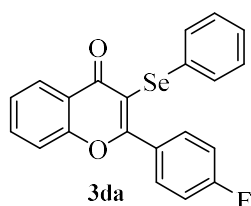

**2-(4-Fluoro)phenyl-3-phenylselanyl-4H-chromen-4-one (3da)** (CAS No.: 1332698-06-2): Flash column chromatography eluent (petroleum ether/ethyl acetate = 20:1); Yield: 84% (200 mg); Yellow solid; m.p. 112-114 °C (lit.<sup>[3]</sup> m.p.: 112-113 °C). <sup>1</sup>H NMR (CDCl<sub>3</sub>, 500 MHz): δ 8.25 (dd, *J* = 8.0, 1.7 Hz, 1H), 7.71-7.66 (m, 3H), 7.47 (dd, *J* = 8.5, 1.0 Hz, 1H), 7.43-7.39 (m, 1H), 7.33-7.28 (m, 2H), 7.16-7.08 (m, 5H) ppm; <sup>13</sup>C NMR (CDCl<sub>3</sub>, 125 MHz): δ 175.93, 166.58, 163.96 (d, *J*<sub>CF</sub> = 250 Hz), 155.89, 134.10, 131.64, 131.57, 131.24, 131.01, 130.27 (d, *J*<sub>CF</sub> = 3.8 Hz), 129.15, 126.78 (d, *J*<sub>CF</sub> = 21.3 Hz), 125.72, 122.33, 117.90, 115.20 (d, *J*<sub>CF</sub> = 22.5 Hz), 114.26 ppm; <sup>77</sup>Se NMR (CDCl<sub>3</sub>, 95.5 MHz): δ 305.23 ppm; <sup>19</sup>F NMR (CDCl<sub>3</sub>, 376.3 MHz) δ -108.10 ppm. GC-MS (EI) m/z: 396 (M<sup>+</sup>, 26%), 394 (16), 77 (100).



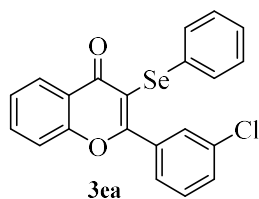

**2-(3-Chloro)phenyl-3-phenylselanyl-4H-chromen-4-one (3ea):** Flash column chromatography eluent (petroleum ether/ethyl acetate = 15:1); Yield: 70% (173 mg); Yellow oil.  $^1\text{H}$  NMR ( $\text{CDCl}_3$ , 400 MHz):  $\delta$  8.26 (dd,  $J = 8.0, 1.6$  Hz, 1H), 7.72-7.68 (m, 1H), 7.62 (t,  $J = 1.9$  Hz, 1H), 7.55 (dt,  $J = 7.7, 1.4$  Hz, 1H), 7.49-7.42 (m, 3H), 7.37-7.30 (m, 3H), 7.18-7.12 (m, 3H) ppm;  $^{13}\text{C}$  NMR ( $\text{CDCl}_3$ , 100 MHz):  $\delta$  175.96, 165.78, 155.92, 135.67, 134.21, 134.04, 131.50, 130.97, 130.73, 129.37, 129.24, 129.18, 127.57, 127.07, 126.76, 125.84, 122.34, 117.95, 115.02 ppm;  $^{77}\text{Se}$  NMR ( $\text{CDCl}_3$ , 95.5 MHz):  $\delta$  305.94 ppm. HRMS (+ESI)  $m/z$ :  $[\text{M} + \text{H}^+]$  calculated for  $\text{C}_{21}\text{H}_{14}\text{ClO}_2\text{Se}^+$  412.9842, found 412.9839.

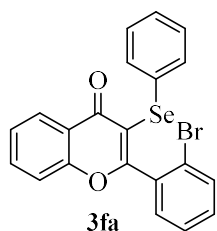

**2-(2-Bromo)phenyl-3-phenylselanyl-4H-chromen-4-one (3fa):** Flash column chromatography eluent (petroleum ether/ethyl acetate = 15:1); Yield: 83% (227 mg); Yellow oil.  $^1\text{H}$  NMR ( $\text{CDCl}_3$ , 400 MHz):  $\delta$  8.28 (dd,  $J = 8.0, 1.7$  Hz, 1H), 7.70-7.62 (m, 2H), 7.47-7.31 (m, 7H), 7.17-7.11 (m, 3H) ppm;  $^{13}\text{C}$  NMR ( $\text{CDCl}_3$ , 100 MHz):  $\delta$  175.74, 166.79, 156.18, 135.58, 134.21, 132.91, 132.10, 131.62, 130.74, 130.33, 129.05, 127.19, 127.15, 126.67, 125.81, 122.75, 122.44, 118.12, 116.31 ppm;  $^{77}\text{Se}$  NMR ( $\text{CDCl}_3$ , 95.5 MHz):  $\delta$  303.88 ppm. HRMS (ESI $^+$ )  $m/z$ :  $[\text{M} + \text{H}^+]$  calculated for  $\text{C}_{21}\text{H}_{14}\text{BrO}_2\text{Se}^+$  456.9337, found 456.9340.

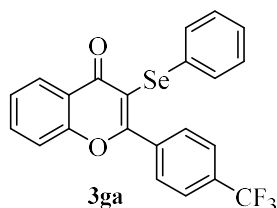

**3-Phenylselanyl-2-(4-trifluoromethyl)phenyl-4H-chromen-4-one (3ga):** Flash column chromatography eluent (petroleum ether/ethyl acetate = 15:1); Yield: 63% (168 mg); Yellow solid; m.p. 138-142 °C. <sup>1</sup>H NMR (CDCl<sub>3</sub>, 400 MHz): δ 8.25 (dd, *J* = 8.0, 1.7 Hz, 1H), 7.77-7.66 (m, 5H), 7.48-7.41 (m, 2H), 7.30-7.25 (m, 2H), 7.15-7.09 (m, 3H) ppm; <sup>13</sup>C NMR (CDCl<sub>3</sub>, 100 MHz): δ 175.84, 165.80, 155.97, 137.45, 134.31, 132.28 (q, *J*<sub>CF</sub> = 32.0 Hz), 131.34, 130.92, 129.75, 129.22, 127.06, 126.73, 125.93, 125.06 (q, *J*<sub>CF</sub> = 3.9 Hz), 122.34, 117.98, 115.25 ppm; <sup>77</sup>Se NMR (CDCl<sub>3</sub>, 95.5 MHz): δ 305.87 ppm; <sup>19</sup>F NMR (CDCl<sub>3</sub>, 376.3 MHz) δ -305.87 ppm. HRMS (+ESI) *m/z*: [M + H<sup>+</sup>] calculated for C<sub>22</sub>H<sub>14</sub>F<sub>3</sub>O<sub>2</sub>Se<sup>+</sup> 447.0106, found 447.0108.

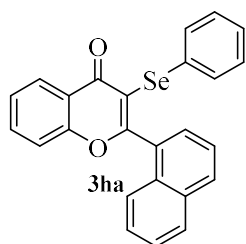

**2-(Naphthalen-1-yl)-3-phenylselanyl-4H-chromen-4-one (3ha)** (CAS No.: 1332698-07-3): Flash column chromatography eluent (petroleum ether/ethyl acetate = 15:1); Yield: 73% (187 mg); Yellow solid; m.p. 103-105°C (lit.<sup>[3]</sup> m.p.: 103-105 °C). <sup>1</sup>H NMR (CDCl<sub>3</sub>, 400 MHz): δ 8.32 (dd, *J* = 8.0, 1.7 Hz, 1H), 7.95 (dd, *J* = 7.8, 1.8 Hz, 1H), 7.88 (d, *J* = 8.2 Hz, 1H), 7.67-7.62 (m, 2H), 7.53-7.38 (m, 6H), 7.22-7.19 (m, 2H), 7.05-7.97 (m, 3H) ppm; <sup>13</sup>C NMR (CDCl<sub>3</sub>, 100 MHz): δ 175.87, 167.48, 156.33, 134.14, 133.31, 132.27, 131.84, 130.80, 130.52, 130.48, 128.86, 128.62, 127.65, 127.21, 127.02, 126.77, 126.51, 125.78, 124.83, 124.78, 122.79, 118.14, 117.39 ppm; <sup>77</sup>Se NMR (CDCl<sub>3</sub>, 95.5 MHz): δ 309.21 ppm. GC-MS (EI) *m/z*: 428 (M<sup>+</sup>, 23%), 426 (11), 77 (100).

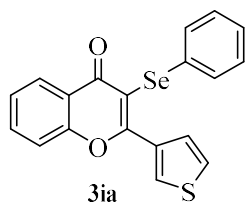

**3-Phenylselanyl-2-(thiophen-3-yl)-4H-chromen-4-one (3ia)** (CAS No.: 2489435-17-6): Flash column chromatography eluent (petroleum ether/ethyl acetate = 15:1); Yield: 81% (186 mg); Yellow solid; m.p. 118-121 °C (lit.<sup>[4]</sup> m.p.: 103-105 °C). <sup>1</sup>H NMR (CDCl<sub>3</sub>, 500 MHz): δ 8.22 (dd, *J* = 8.0, 1.7 Hz, 1H), 8.18 (dd, *J* = 3.1, 1.4 Hz, 1H), 7.72 (dd, *J* = 5.1, 1.3 Hz, 1H), 7.68-7.64 (m, 1H), 7.47 (d, *J* = 8.5 Hz, 1 H), 7.41-7.31 (m, 4H), 7.18-7.11 (m, 3H) ppm; <sup>13</sup>C NMR (CDCl<sub>3</sub>, 125 MHz): δ 176.05, 162.62, 155.67, 134.58, 134.03, 131.41, 130.96, 130.35, 129.25, 128.48, 126.70, 126.68, 125.59, 125.33, 122.25, 117.79, 112.61 ppm; <sup>77</sup>Se NMR (CDCl<sub>3</sub>, 95.5 MHz): δ 296.72 ppm. GC-MS (EI) m/z: 384 (M<sup>+</sup>, 19%), 382 (10), 184 (100).

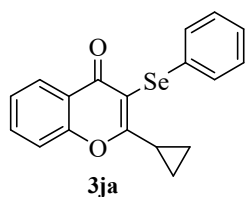

**2-Cyclopropyl-3-phenylselanyl-4H-chromen-4-one (3ja)** (CAS No.: 2489435-16-5): Flash column chromatography eluent (petroleum ether/ethyl acetate = 15:1); Yield: 57% (117 mg); Yellow solid; m.p. 105-108 °C (lit.<sup>[4]</sup> m.p.: 104-106 °C). <sup>1</sup>H NMR (CDCl<sub>3</sub>, 500 MHz): δ 8.17 (dd, *J* = 8.0, 1.8 Hz, 1H), 7.59-7.56 (m, 1H), 7.44-7.42 (m, 2H), 7.34-7.27 (m, 2H), 7.19-7.12 (m, 3H), 3.05-2.99 (m, 1H), 1.28 (dt, *J* = 7.7, 4.5 Hz, 2H), 1.08 (dt, *J* = 11.2, 4.1 Hz, 2H) ppm; <sup>13</sup>C NMR (CDCl<sub>3</sub>, 125 MHz): δ 174.80, 172.77, 155.04, 133.52, 131.36, 130.58, 129.12, 126.61, 126.58, 125.30, 122.61, 117.27, 112.54, 16.12, 10.06 ppm; <sup>77</sup>Se NMR (CDCl<sub>3</sub>, 95.5 MHz): δ 264.32 ppm. GC-MS (EI) m/z: 342 (M<sup>+</sup>, 28%), 340 (14), 327 (100).

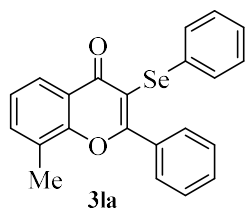

**8-Methyl-2-phenyl-3-phenylselanyl-4H-chromen-4-one (3la)** (CAS No.: 2489435-19-8): Flash column chromatography eluent (petroleum ether/ethyl acetate = 15:1); Yield: 69% (162 mg); Yellow solid; m.p. 126-128 °C (lit.<sup>[4]</sup> m.p.: 126-128 °C). <sup>1</sup>H NMR (CDCl<sub>3</sub>, 500 MHz): δ 8.11 (dd, *J* = 8.1, 1.7 Hz, 1H), 7.75-7.73 (m, 2H), 7.52-7.44 (m, 4H), 7.36-7.29 (m, 3H), 7.17-7.11 (m, 3H), 2.48 (s, 3H) ppm; <sup>13</sup>C NMR (CDCl<sub>3</sub>, 125 MHz): δ 176.34, 167.35, 154.48, 134.92, 134.31, 131.51, 130.89, 130.81, 129.40, 129.10, 128.07, 127.44, 126.70, 125.22, 124.26, 122.31, 113.80, 15.69 ppm; <sup>77</sup>Se NMR (CDCl<sub>3</sub>, 95.5 MHz): δ 303.08 ppm. GC-MS (EI) *m/z*: 392 (M<sup>+</sup>, 13%), 390 (6), 105 (100).

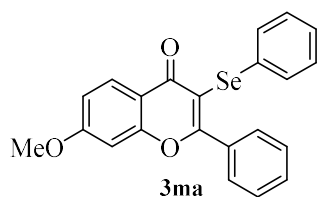

**7-Methoxy-2-phenyl-3-phenylselanyl-4H-chromen-4-one (3ma)** (CAS No.: 2794102-84-2): Flash column chromatography eluent (petroleum ether/ethyl acetate = 15:1); Yield: 62% (152 mg); Yellow oil. <sup>1</sup>H NMR (CDCl<sub>3</sub>, 500 MHz): δ 8.16 (d, *J* = 8.9 Hz, 1H), 7.67-7.65 (m, 2H), 7.50-7.41 (m, 3H), 7.34-7.29 (m, 2H), 7.16-7.11 (m, 3H), 6.99 (dd, *J* = 8.9, 2.4 Hz, 1H), 6.87 (d, *J* = 2.4 Hz, 1H), 3.88 (s, 3H) ppm; <sup>13</sup>C NMR (CDCl<sub>3</sub>, 125 MHz): δ 175.28, 167.44, 164.34, 157.72, 134.24, 131.56, 130.88, 130.67, 129.23, 129.06, 128.14, 128.00, 126.65, 116.31, 114.99, 114.00, 100.07, 55.91 ppm; <sup>77</sup>Se NMR (CDCl<sub>3</sub>, 95.5 MHz): δ 301.65 ppm. GC-MS (EI) *m/z*: 408 (M<sup>+</sup>, 17%), 406 (8), 178 (100).

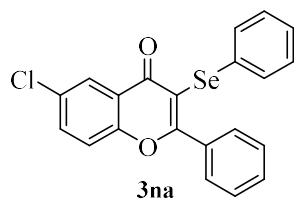

**6-Chloro-2-phenyl-3-phenylselanyl-4H-chromen-4-one (3na)** (CAS No.: 1332698-13-1): Flash column chromatography eluent (petroleum ether/ethyl acetate = 15:1); Yield: 62% (154 mg); Yellow solid; m.p. 128-130 °C (lit.<sup>[4]</sup> m.p.: 128-130 °C). <sup>1</sup>H NMR (CDCl<sub>3</sub>, 500 MHz): δ 8.20 (d, *J* = 2.6 Hz, 1H), 7.68-7.66 (m, 2H), 7.61 (dd, *J* = 9.0, 2.7 Hz, 1H), 7.52-7.49 (m, 1H), 7.47-7.43 (m, 3H), 7.33-7.29 (m, 2H), 7.16-7.12 (m, 3H) ppm; <sup>13</sup>C NMR (CDCl<sub>3</sub>, 125 MHz): δ 174.94, 167.81, 154.32, 134.19, 133.84, 131.46, 131.27, 131.00, 130.98, 129.29, 129.12, 128.08, 126.96, 126.02, 123.29, 119.75, 114.30 ppm; <sup>77</sup>Se NMR (CDCl<sub>3</sub>, 95.5 MHz): δ 307.59 ppm. GC-MS (EI) m/z: 412 (M<sup>+</sup>, 20%), 414 (M+2, 6), 410 (10), 178 (100).

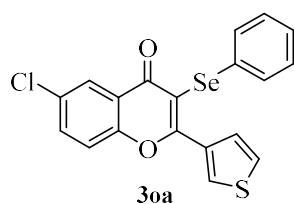

**6-Chloro-3-phenylselanyl-2-(thiophen-3-yl)-4H-chromen-4-one (3oa)**: Flash column chromatography eluent (petroleum ether/ethyl acetate = 15:1); Yield: 54% (136 mg); Yellow solid; m.p. 156-159 °C. <sup>1</sup>H NMR (CDCl<sub>3</sub>, 400 MHz): δ 8.19 (dd, *J* = 3.0, 1.3 Hz, 1H), 8.17 (d, *J* = 2.6 Hz, 1H), 7.71 (dd, *J* = 5.1, 1.3 Hz, 1H), 7.61 (dd, *J* = 8.9, 2.6 Hz, 1H), 7.45 (d, *J* = 8.9 Hz, 1H), 7.38-7.32 (m, 3H), 7.20-7.12 (m, 3H) ppm; <sup>13</sup>C NMR (CDCl<sub>3</sub>, 100 MHz): δ 175.06, 162.67, 154.01, 134.24, 134.23, 131.42, 131.33, 131.29, 131.02, 130.54, 130.48, 130.41, 129.31, 128.41, 126.90, 126.06, 125.49, 123.11, 119.59, 112.68 ppm; <sup>77</sup>Se NMR (CDCl<sub>3</sub>, 95.5 MHz): δ 298.97 ppm. HRMS (+ESI) m/z: [M + H<sup>+</sup>] calculated for C<sub>19</sub>H<sub>12</sub>ClO<sub>2</sub>SSe<sup>+</sup> 418.9407, found 418.9410.

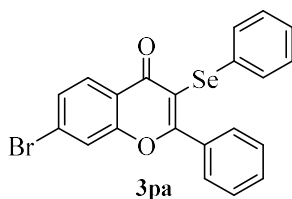

**7-Bromo-2-phenyl-3-phenylselanyl-4H-chromen-4-one (3pa)** (CAS No.: 2489435-22-3): Flash column chromatography eluent (petroleum ether/ethyl acetate = 15:1); Yield: 61% (167 mg); Yellow solid; m.p. 84-86 °C (lit.<sup>[5]</sup> m.p.: 84-85 °C). <sup>1</sup>H NMR (CDCl<sub>3</sub>, 500 MHz): δ 8.10 (d, *J* = 8.6 Hz, 1H), 7.69-7.35 (m, 3H), 7.54 (dd, *J* = 8.5, 1.8 Hz, 1H), 7.52-7.49 (m, 1H), 7.46-7.43 (m, 2H), 7.33-7.28 (m, 2H), 7.17-7.12 (m, 3H) ppm; <sup>13</sup>C NMR (CDCl<sub>3</sub>, 125 MHz): δ 175.46, 167.66, 156.01, 133.76, 131.24, 130.99, 129.29, 129.26, 129.11, 128.26, 128.15, 128.09, 126.95, 121.23, 121.08, 114.63 ppm; <sup>77</sup>Se NMR (CDCl<sub>3</sub>, 95.5 MHz): δ 307.59 ppm. GC-MS (EI) *m/z*: 456 (M<sup>+</sup>, 12%), 458 (M+2, 9), 454 (6), 105 (100).

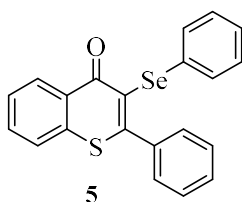

**2-Phenyl-3-phenylselanyl-4H-thiophene-4-one (5)** (CAS No.: 2552737-73-0): Flash column chromatography eluent (petroleum ether/ethyl acetate = 20:1); Yield: 29% (69 mg); Yellow solid; m.p. 118-120 °C (lit.<sup>[6]</sup> m.p.: 112-113 °C). <sup>1</sup>H NMR (CDCl<sub>3</sub>, 400 MHz): δ (dd, *J* = 8.6, 1.6 Hz, 1H), 7.62-7.51 (m, 3H), 7.41-7.30 (m, 5H), 7.24-7.18 (m, 2H), 7.12-7.04 (m, 3H) ppm; <sup>13</sup>C NMR (CDCl<sub>3</sub>, 100 MHz): δ 178.13, 156.08, 138.11, 137.21, 132.01, 131.99, 131.73, 129.79, 129.71, 129.67, 128.90, 128.54, 128.36, 128.14, 126.70, 125.61 ppm; <sup>77</sup>Se NMR (CDCl<sub>3</sub>, 95.5 MHz): δ 360.33 ppm. GC-MS (EI) *m/z*: 394 (M<sup>+</sup>, 40%), 392 (22), 178 (100).

## 6. References:

1. W. Yin, H. He, Y. Zhang, D. Luo and H. He, *Synthesis* 2014, **46**, 2617-2621.
2. C. Zhou, A. Dubrovsky and R. Larock, *J. Org. Chem.* 2006, **71**, 1626-1632.
3. G. Zeni, B. Godoi and C. A. Bruning, *Adv. Synth. Catal.* 2011, **353**, 2042-2050.
4. Y. F. Du, K. Zhao, Z. K. Ai, J. X. Xiao and Y. D. Li, *Org. Chem. Front.* 2020, **7**, 3935-3940.
5. H. B. Zhang, E. Tang, J. R. Lai, F. D. Yin and Q. S. Guo, *Org. Biomol. Chem.* 2022, **20**, 5104-5114.
6. R. F. Schumacher, B. Godoi, T. Barcellos, T. Anjos and E. L. Gutterres, *New J. Chem.* 2023, **47**, 1076-1080.

## 6. $^1\text{H}$ , $^{13}\text{C}$ , $^{77}\text{Se}$ and $^{19}\text{F}$ NMR spectra of products

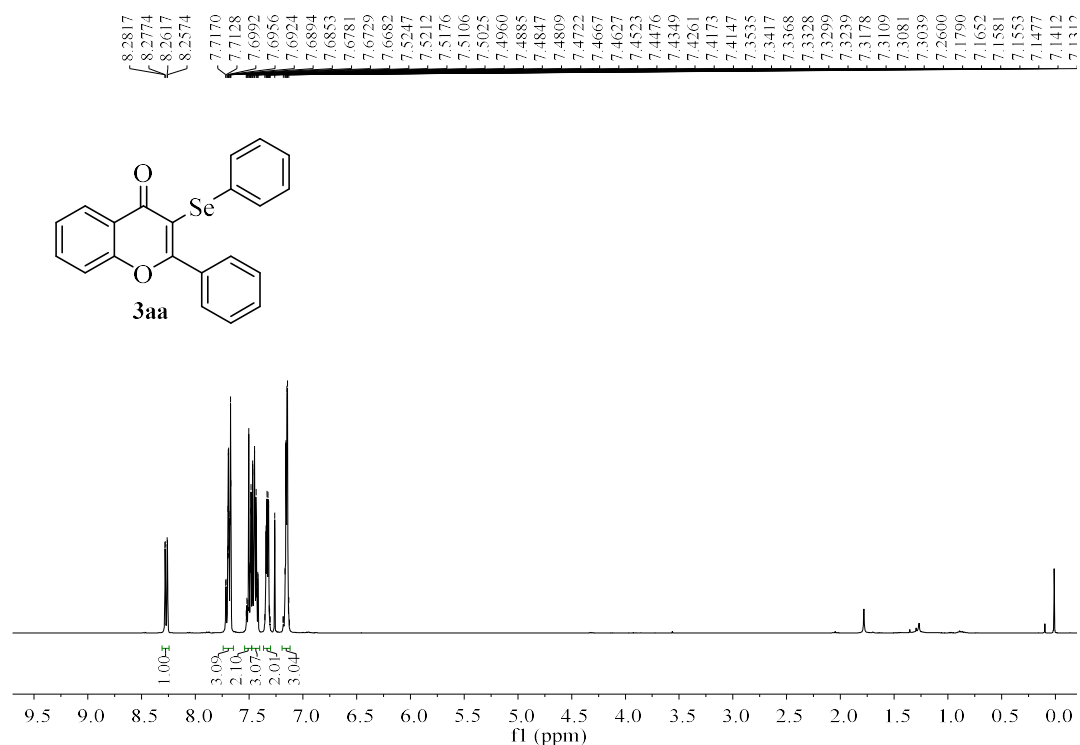

Figure S6  $^1\text{H}$  NMR (400 MHz) spectrum of **3aa** in  $\text{CDCl}_3$

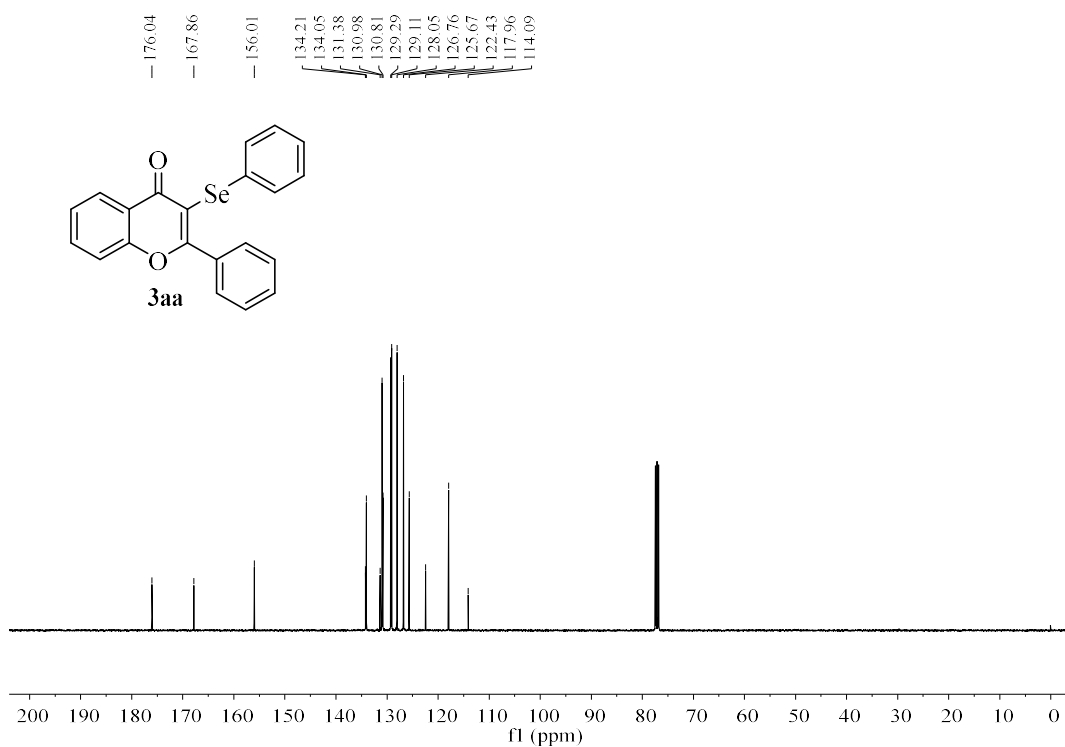

Figure S7  $^{13}\text{C}$  NMR (100 MHz) spectrum of **3aa** in  $\text{CDCl}_3$



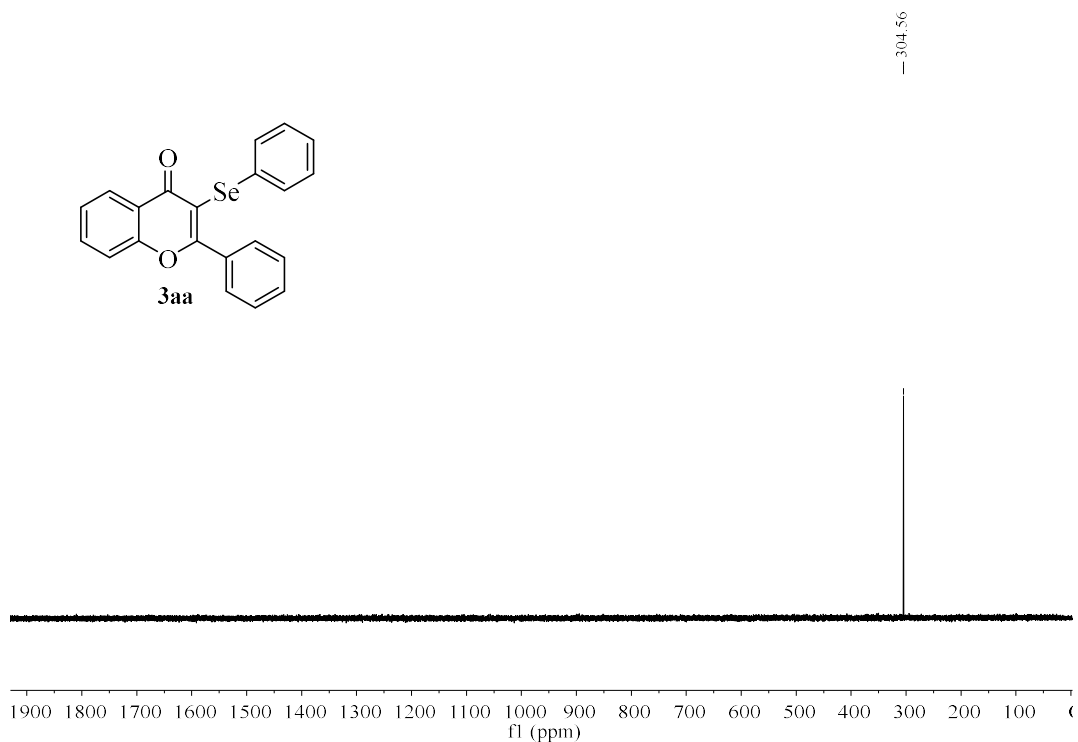

**Figure S8**  $^{77}\text{Se}$  NMR (95.5 MHz) spectrum of **3aa** in  $\text{CDCl}_3$

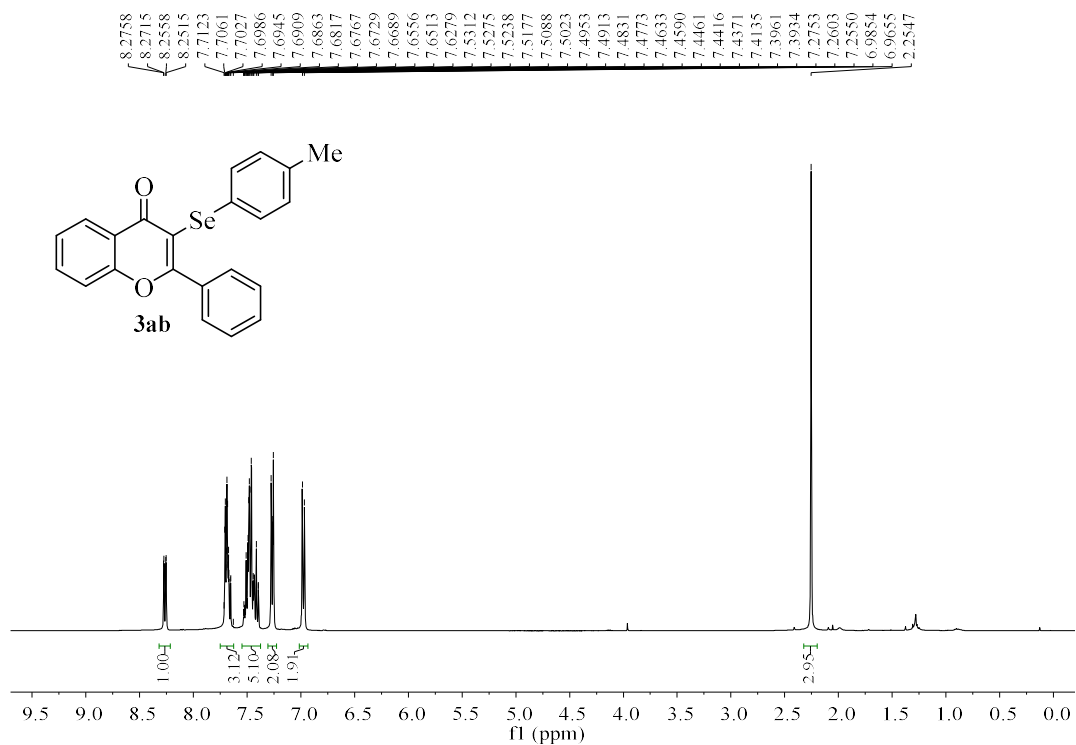

**Figure S9**  $^1\text{H}$  NMR (400 MHz) spectrum of **3ab** in  $\text{CDCl}_3$

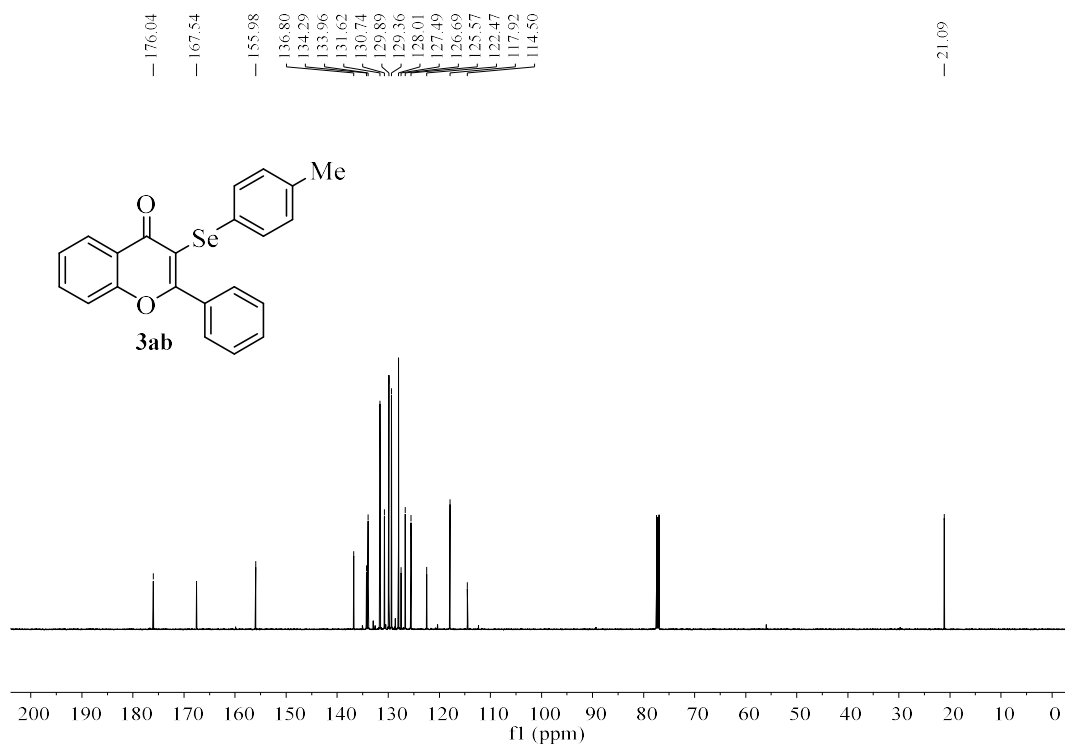

**Figure S10** <sup>13</sup>C NMR (125 MHz) spectrum of **3ab** in CDCl<sub>3</sub>

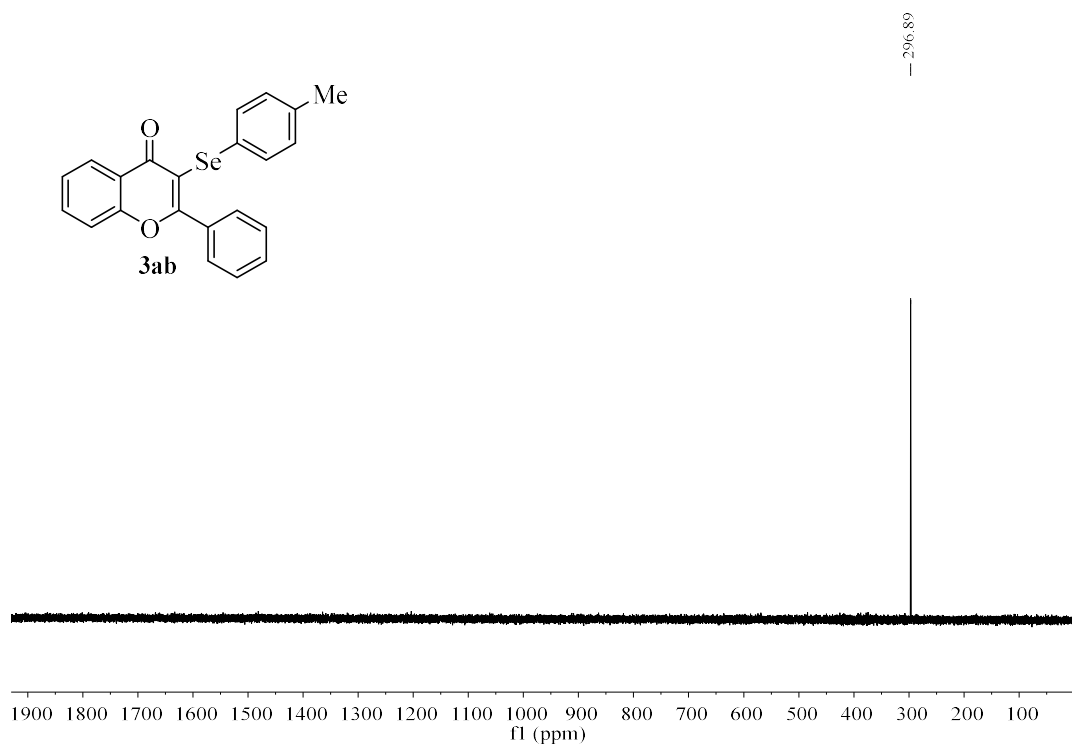

**Figure S11** <sup>77</sup>Se NMR (95.5 MHz) spectrum of **3ab** in CDCl<sub>3</sub>

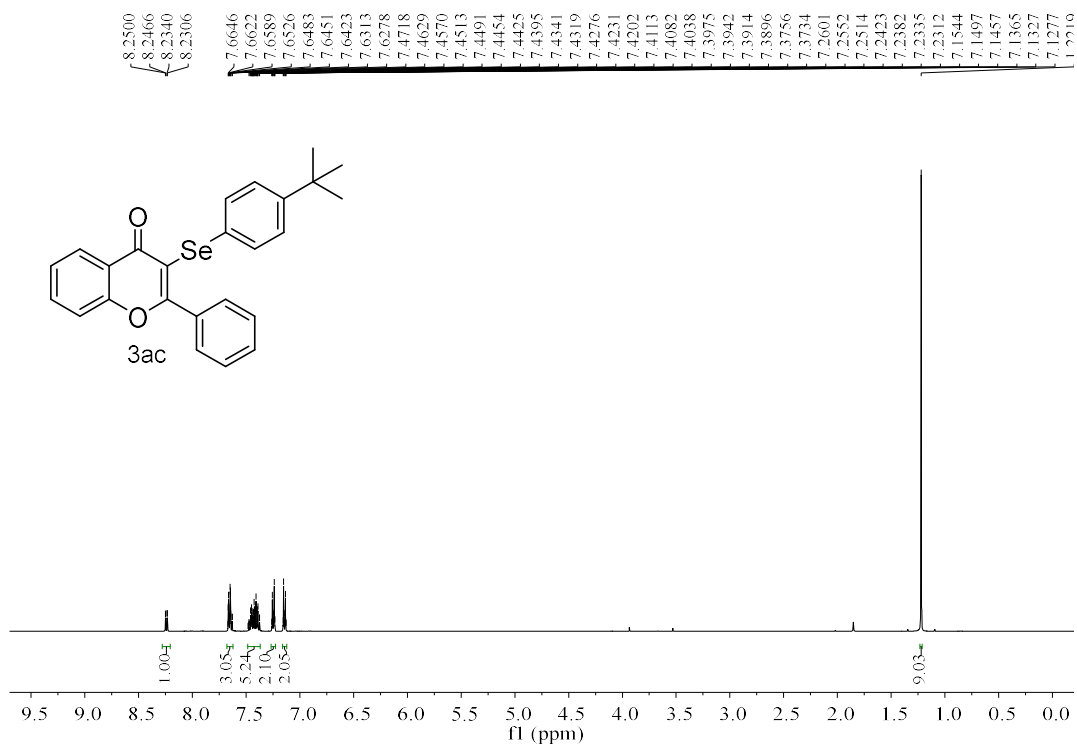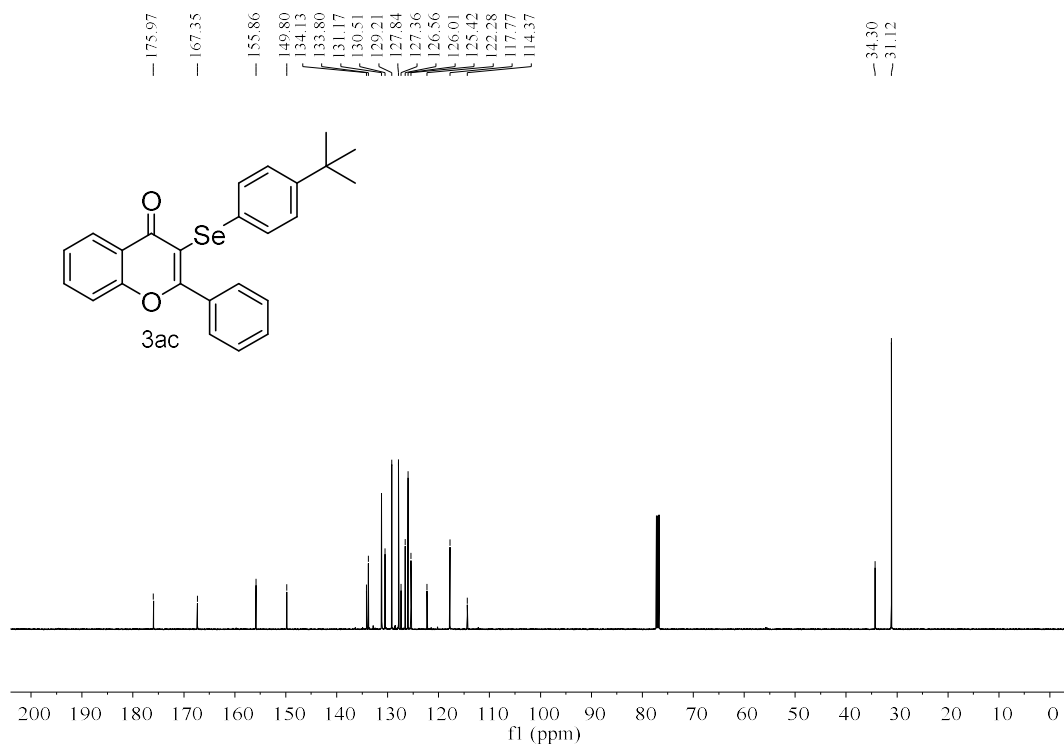

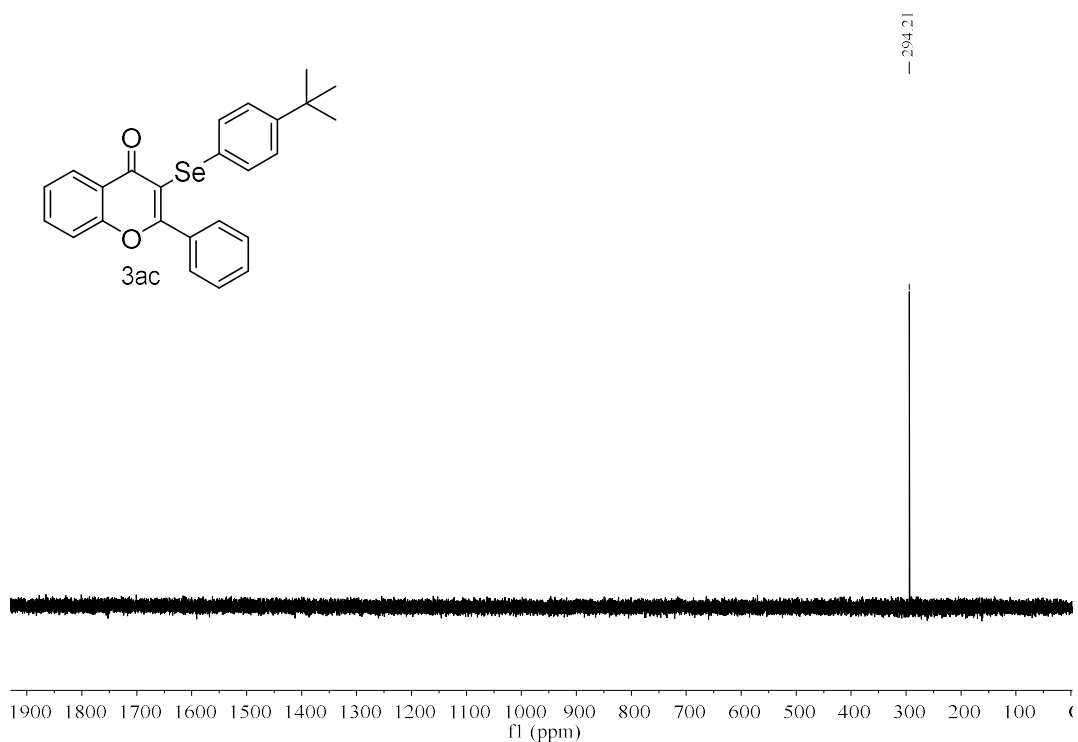

**Figure S14** <sup>77</sup>Se NMR (95.5 MHz) spectrum of **3ac** in CDCl<sub>3</sub>

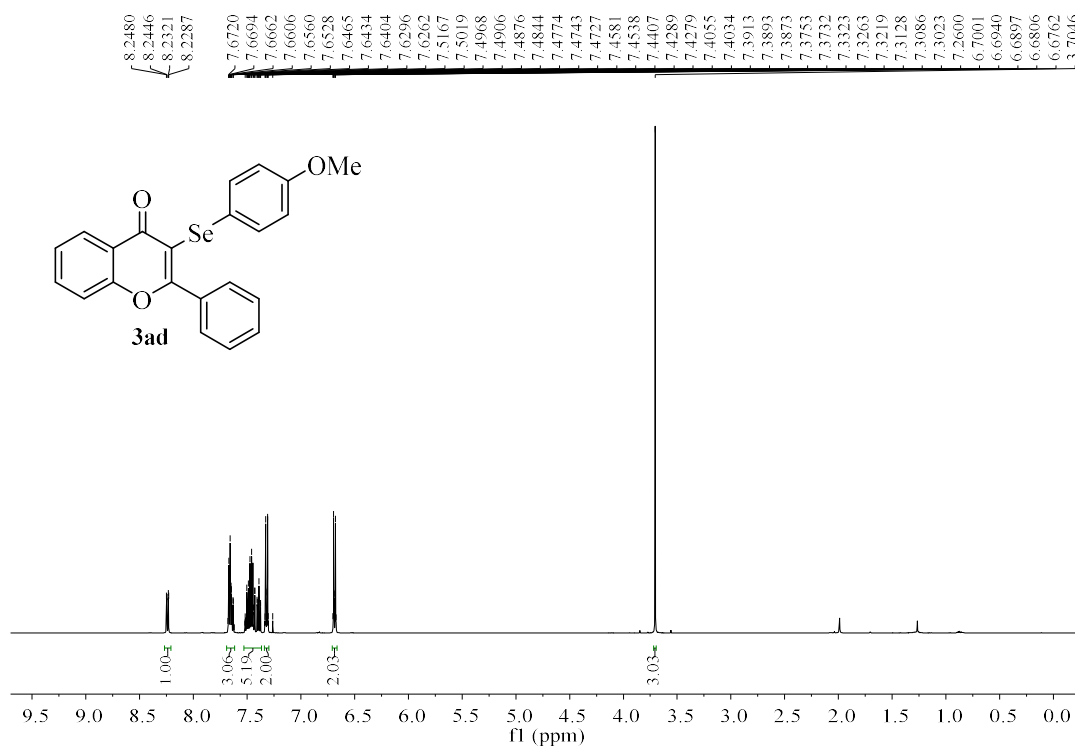

**Figure S15** <sup>1</sup>H NMR (500 MHz) spectrum of **3ad** in CDCl<sub>3</sub>

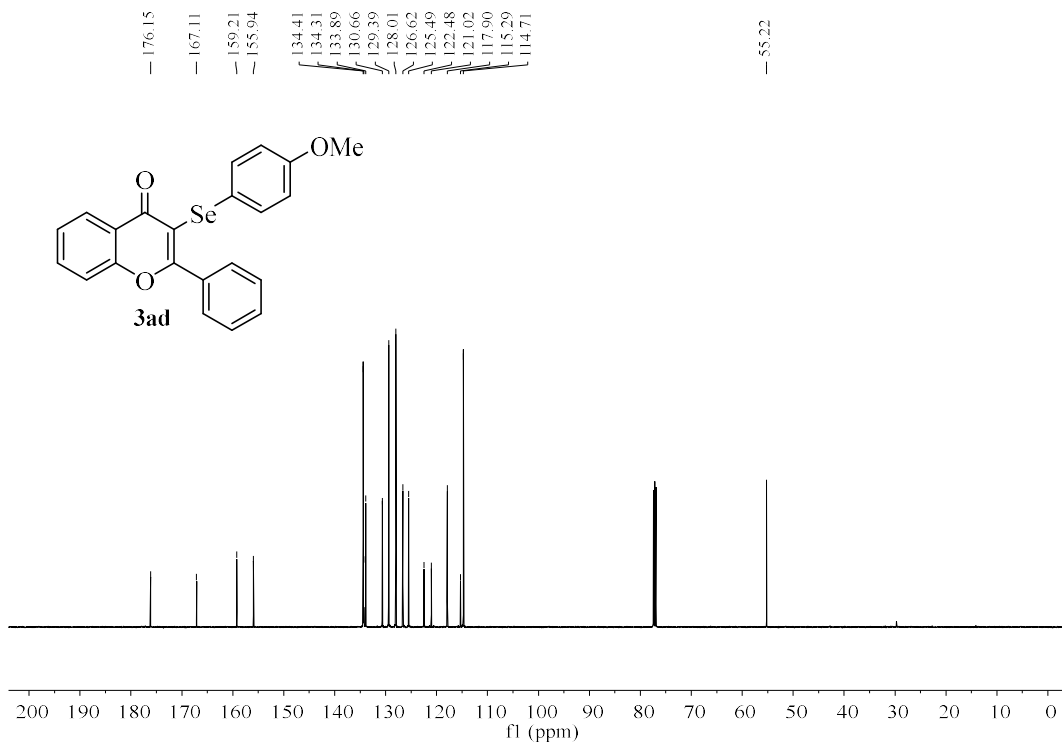

**Figure S16**  $^{13}\text{C}$  NMR (125 MHz) spectrum of **3ad** in  $\text{CDCl}_3$

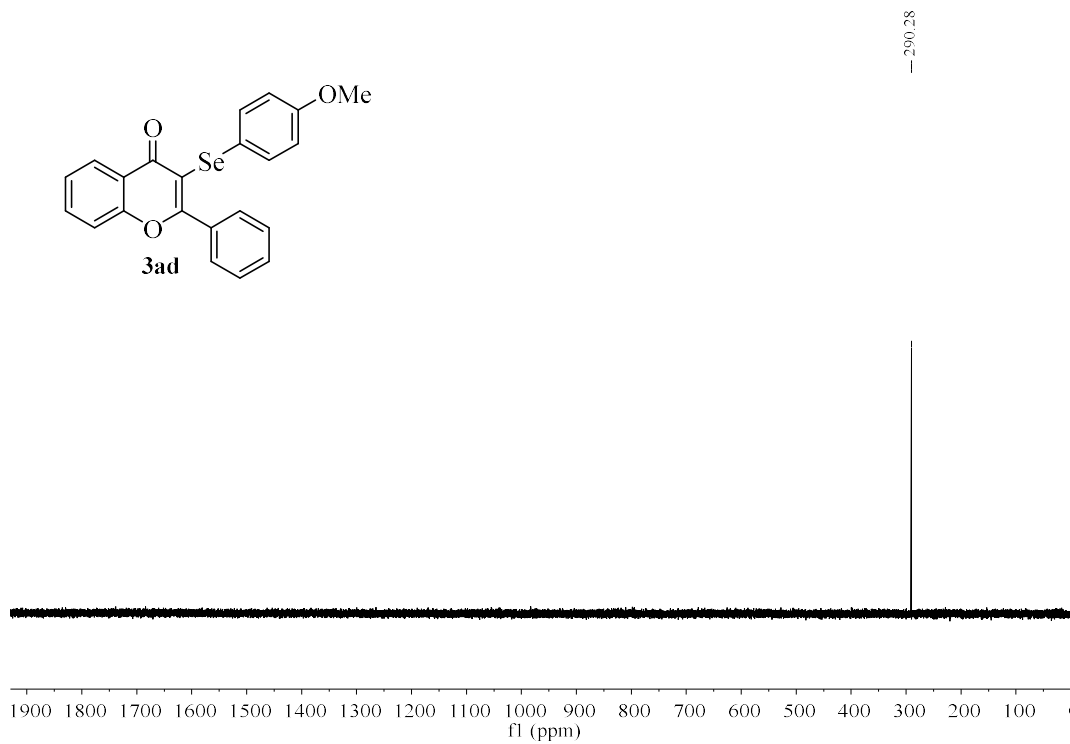

**Figure S17**  $^{77}\text{Se}$  NMR (95.5 MHz) spectrum of **3ad** in  $\text{CDCl}_3$

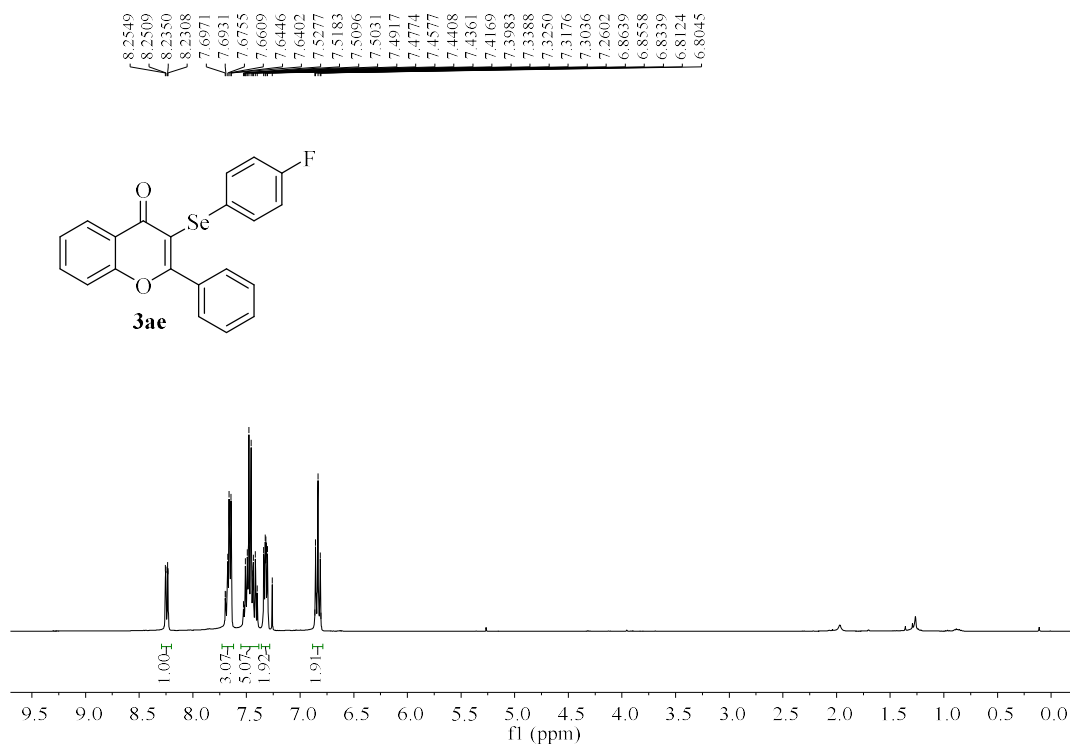

**Figure S18**  $^1\text{H}$  NMR (400 MHz) spectrum of **3ae** in  $\text{CDCl}_3$

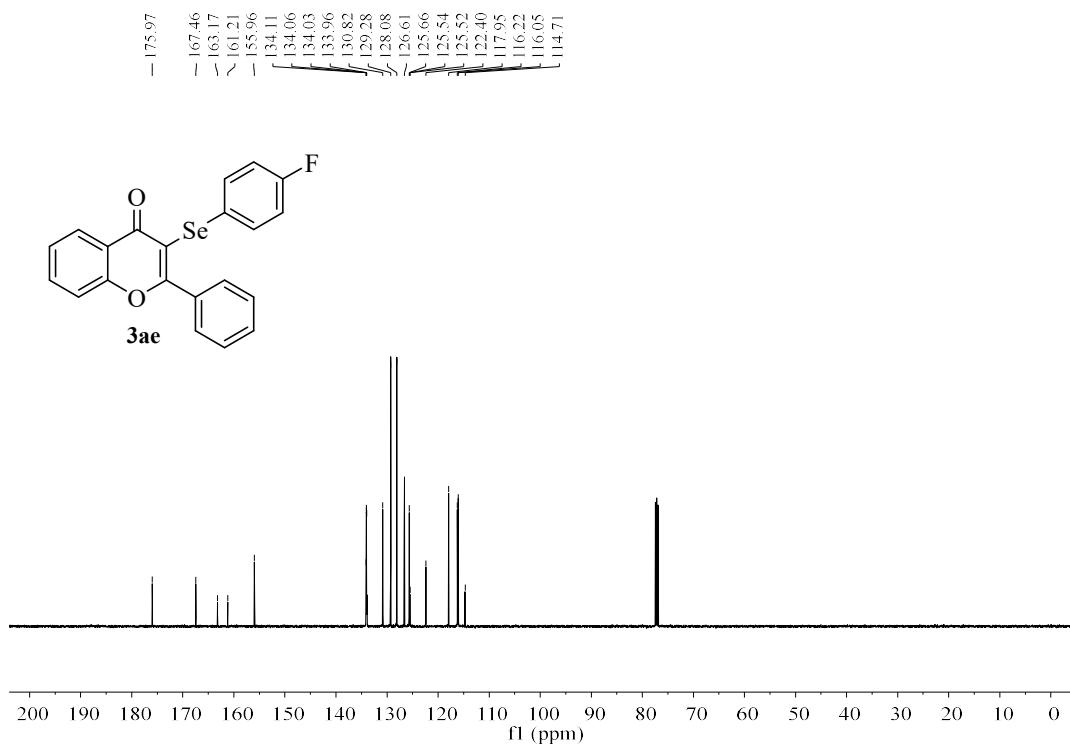

**Figure S19**  $^{13}\text{C}$  NMR (125 MHz) spectrum of **3ae** in  $\text{CDCl}_3$

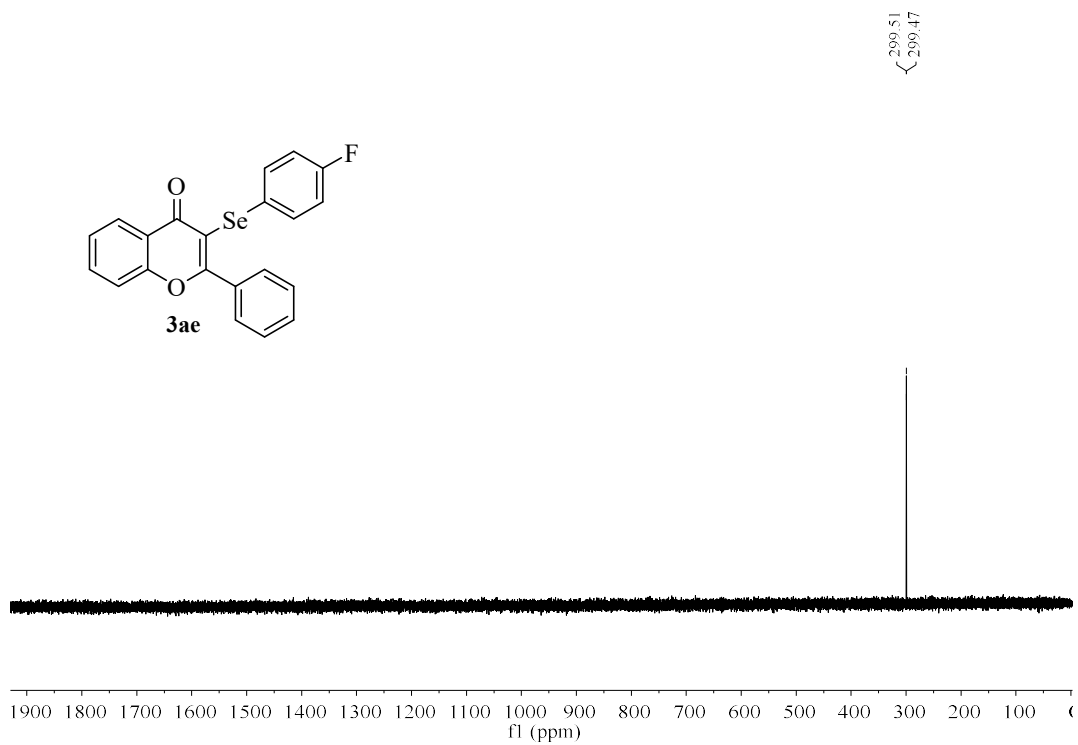

**Figure S20**  $^{77}\text{Se}$  NMR (95.5 MHz) spectrum of **3ae** in  $\text{CDCl}_3$

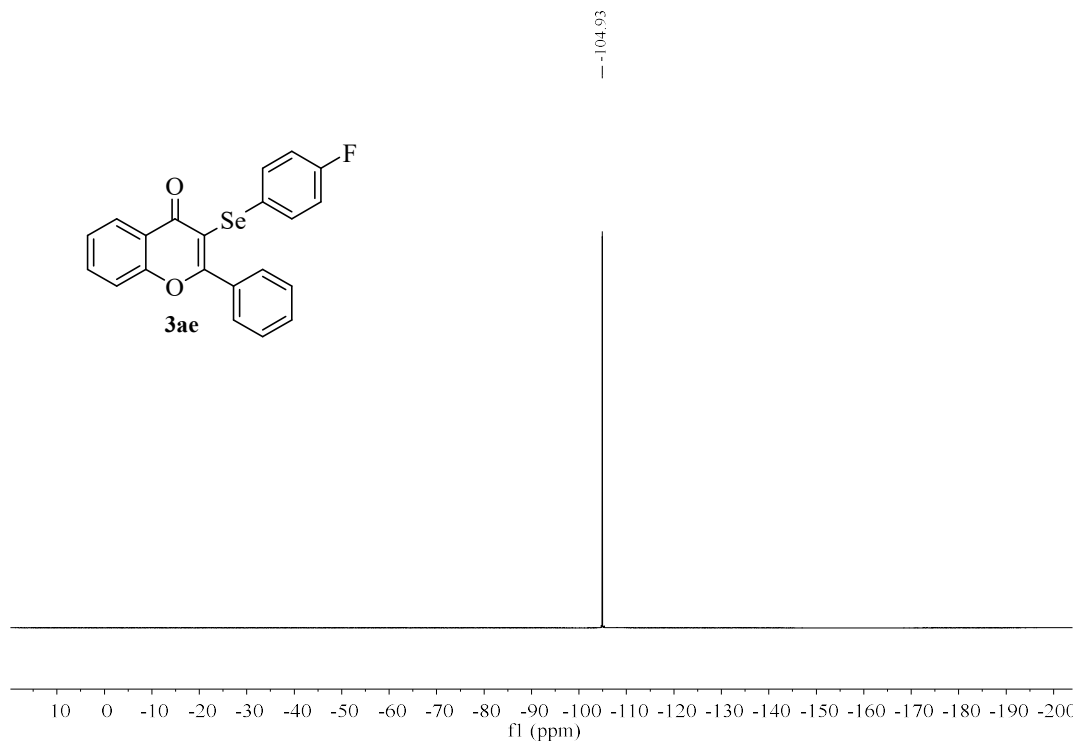

**Figure S21**  $^{19}\text{F}$  NMR (376.3 MHz) spectrum of **3ae** in  $\text{CDCl}_3$

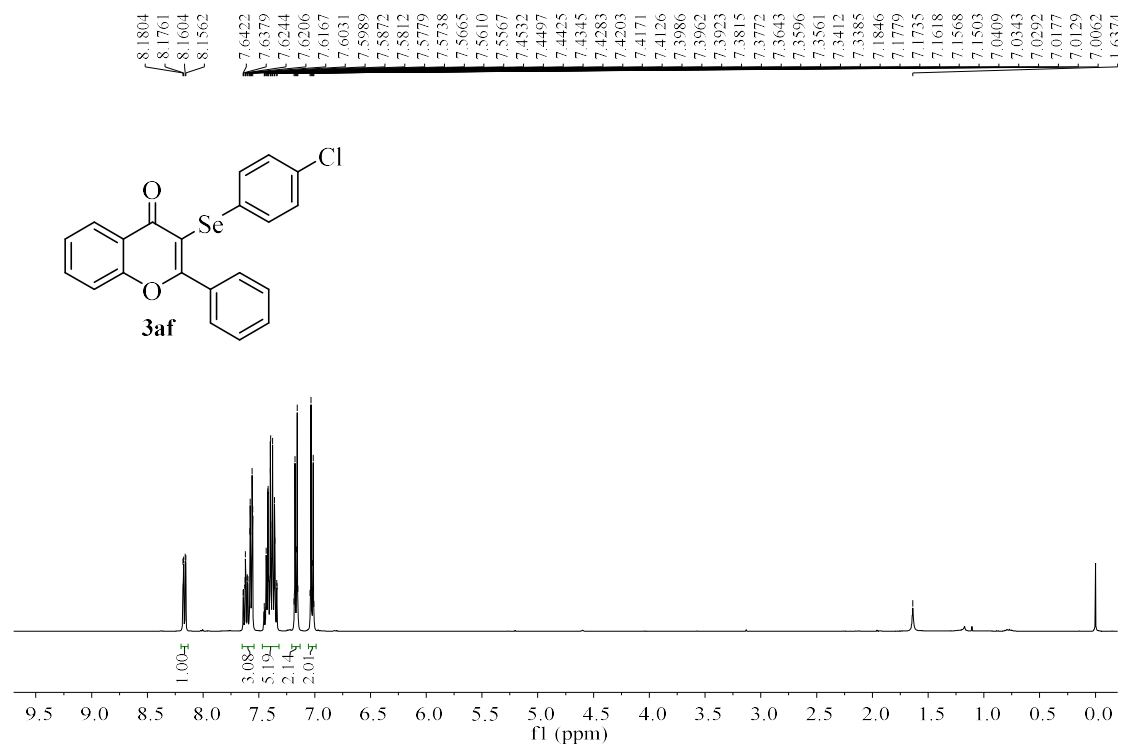

**Figure S22** <sup>1</sup>H NMR (400 MHz) spectrum of **3af** in CDCl<sub>3</sub>

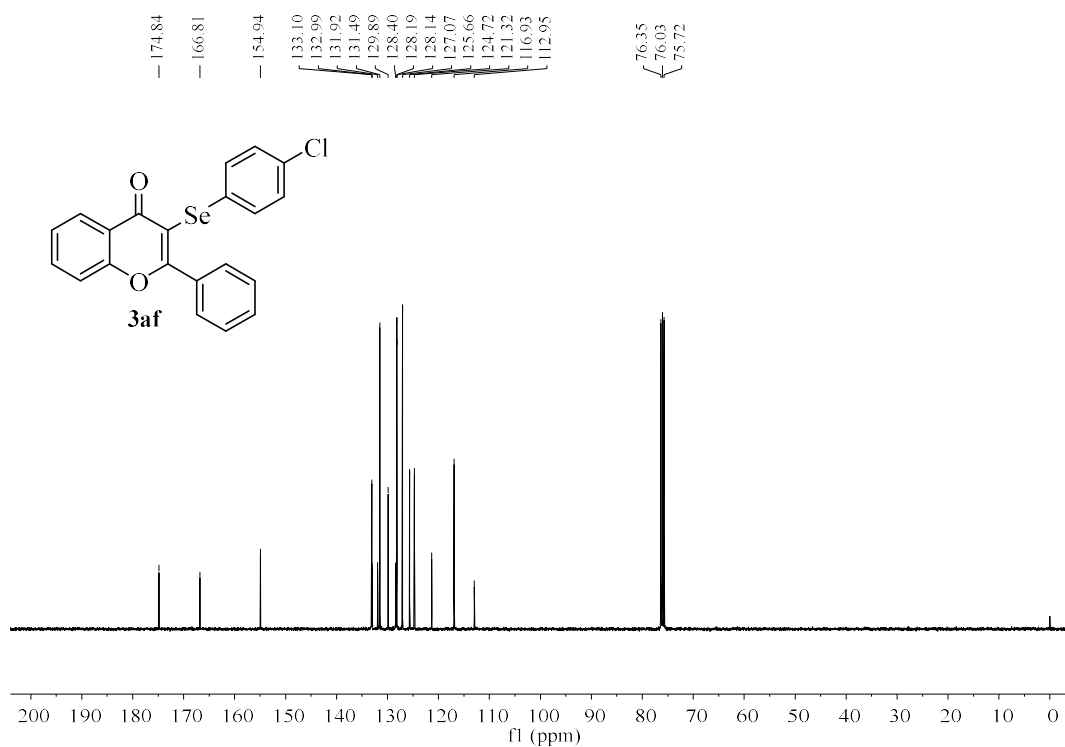

**Figure S23** <sup>13</sup>C NMR (100 MHz) spectrum of **3af** in CDCl<sub>3</sub>



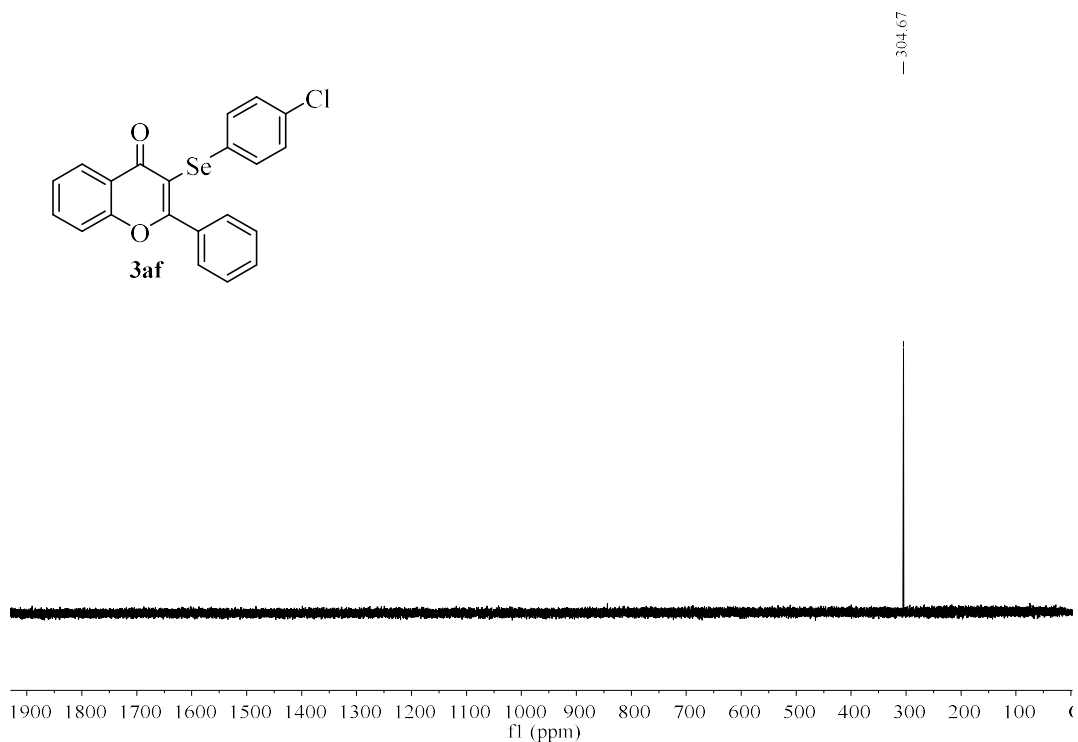

**Figure S24**  $^{77}\text{Se}$  NMR (95.5 MHz) spectrum of **3af** in  $\text{CDCl}_3$

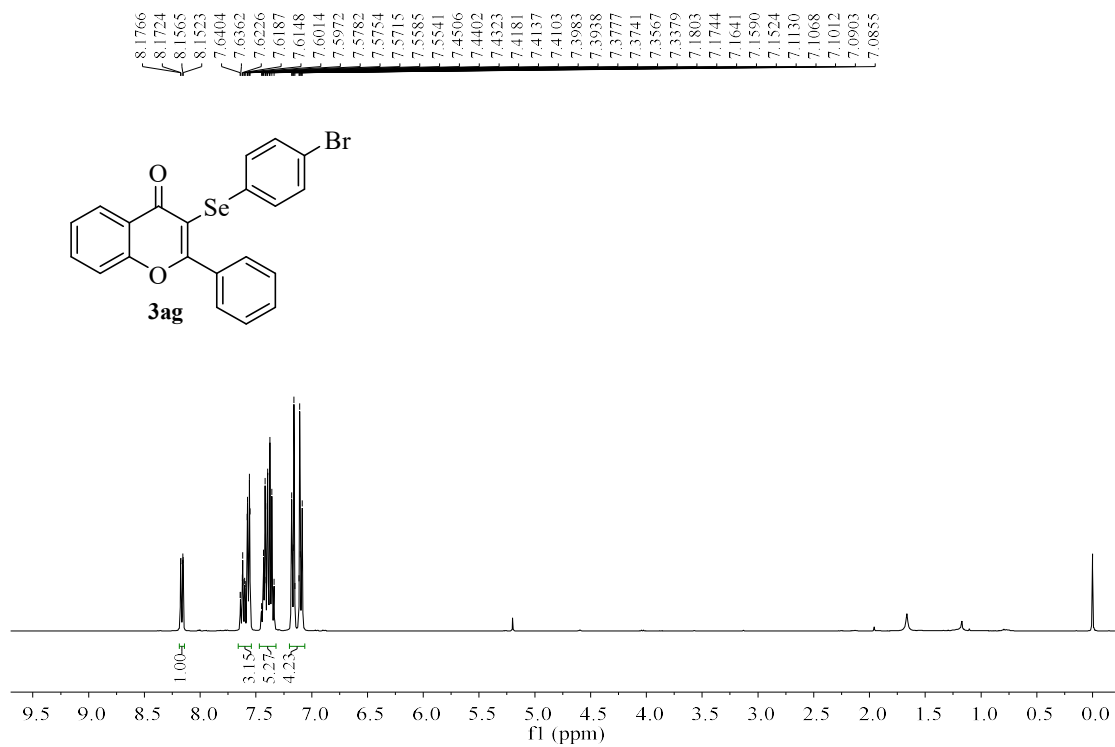

**Figure S25**  $^1\text{H}$  NMR (400 MHz) spectrum of **3ag** in  $\text{CDCl}_3$

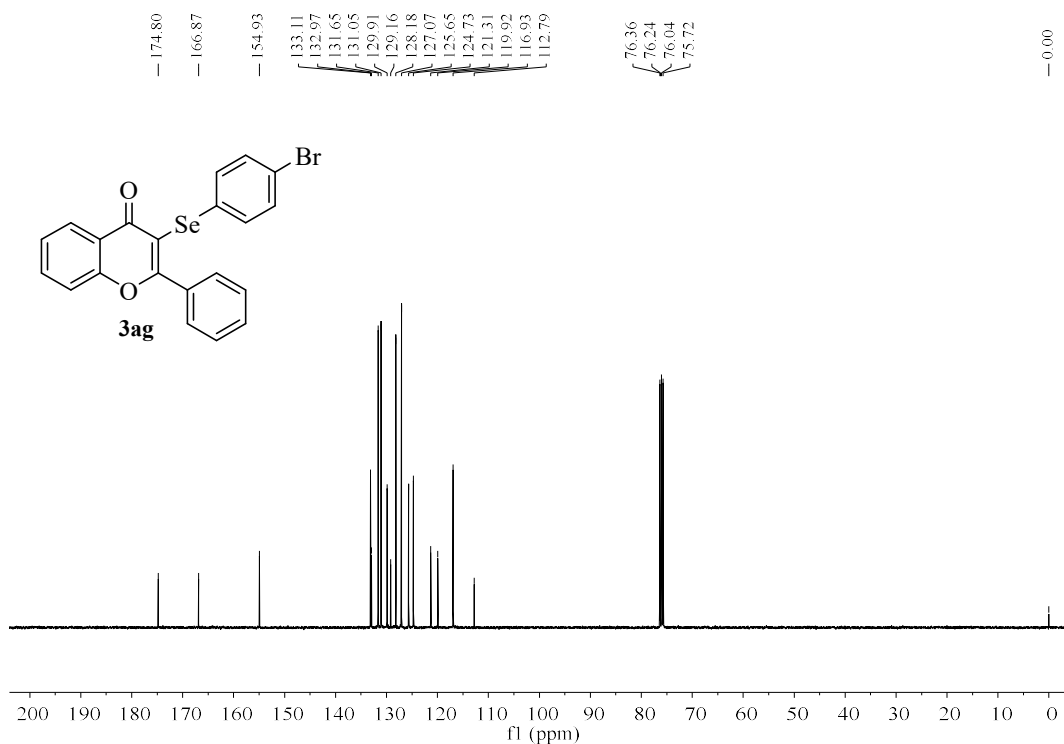

**Figure S26** <sup>13</sup>C NMR (100 MHz) spectrum of **3ag** in CDCl<sub>3</sub>

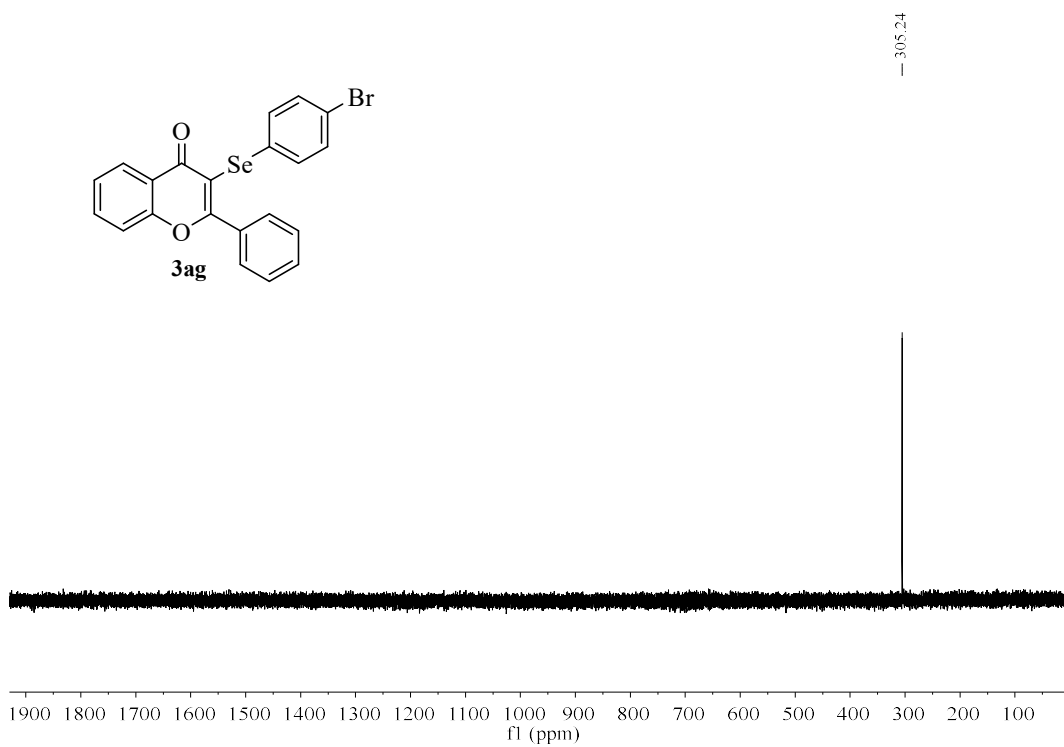

**Figure S27** <sup>77</sup>Se NMR (95.5 MHz) spectrum of **3ag** in CDCl<sub>3</sub>

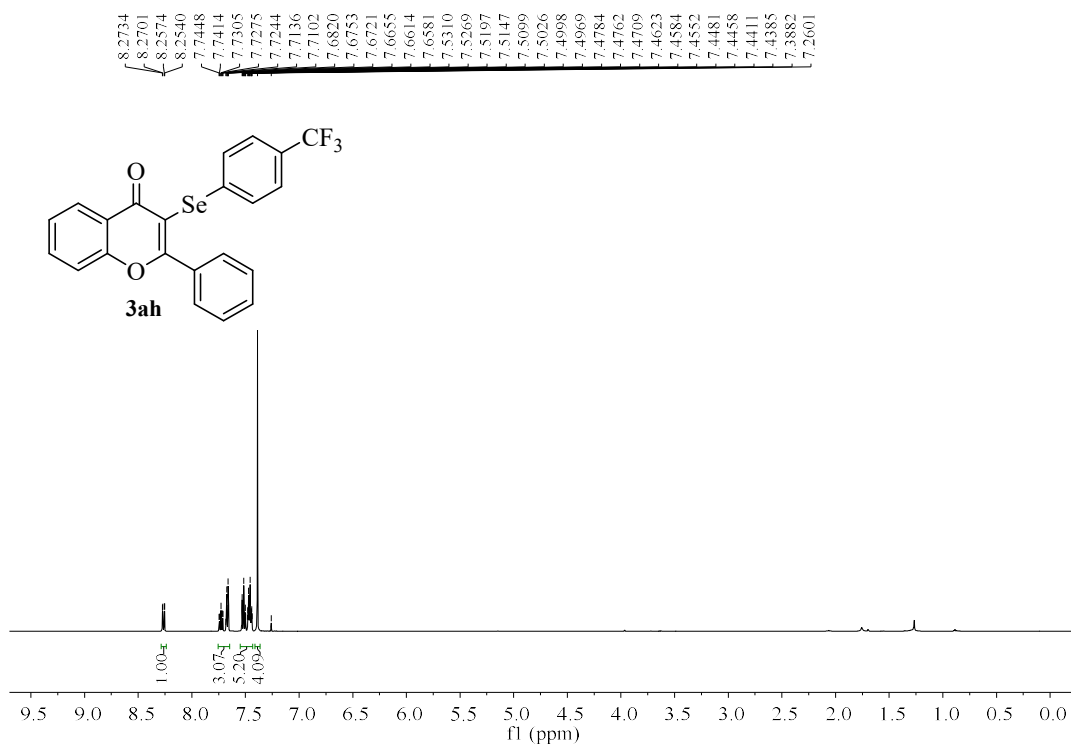

**Figure S28** <sup>1</sup>H NMR (500 MHz) spectrum of **3ah** in CDCl<sub>3</sub>

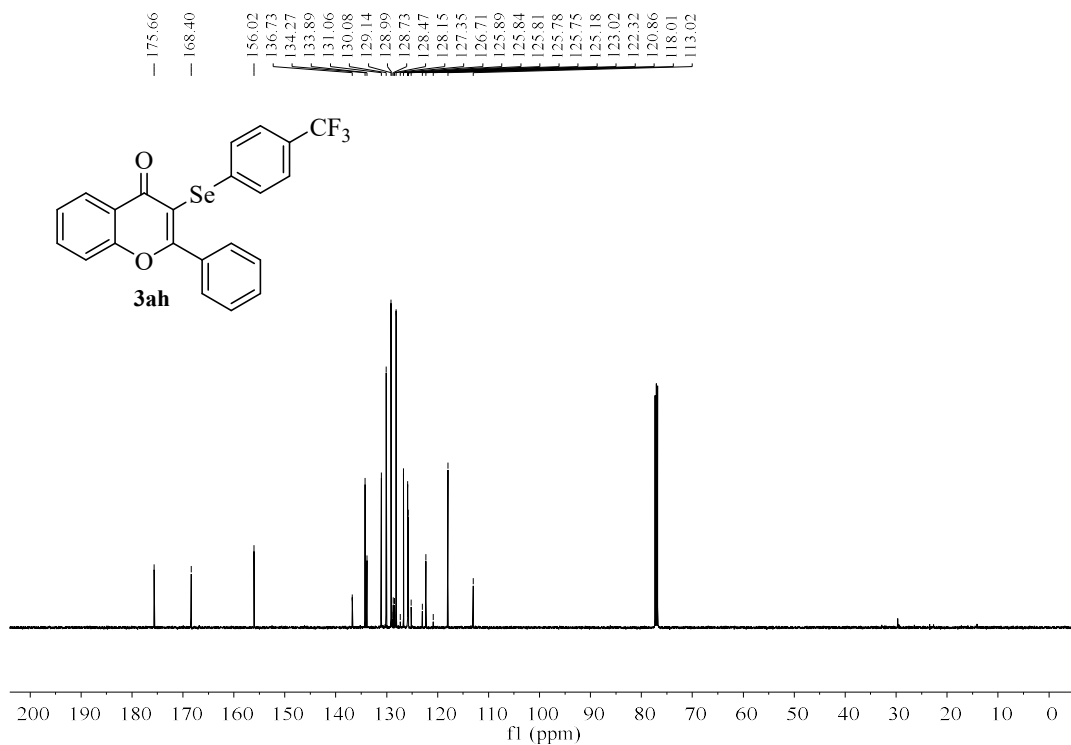

**Figure S29** <sup>13</sup>C NMR (125 MHz) spectrum of **3ah** in CDCl<sub>3</sub>

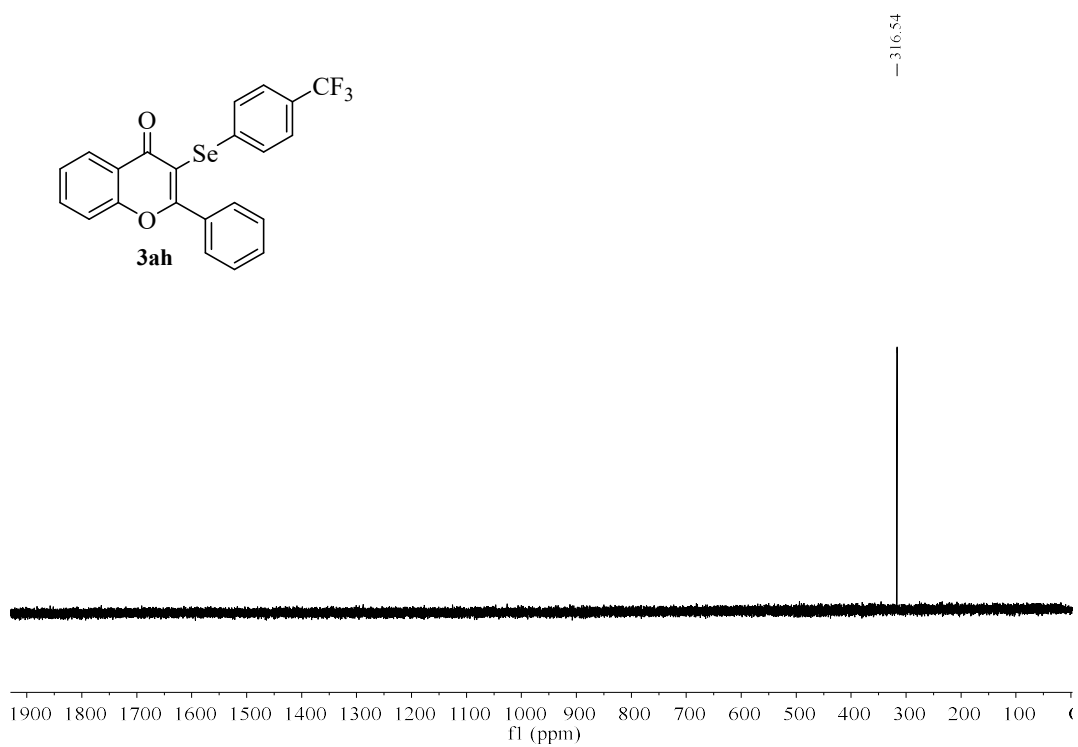

**Figure S30**  $^{77}\text{Se}$  NMR (95.5 MHz) spectrum of **3ah** in  $\text{CDCl}_3$

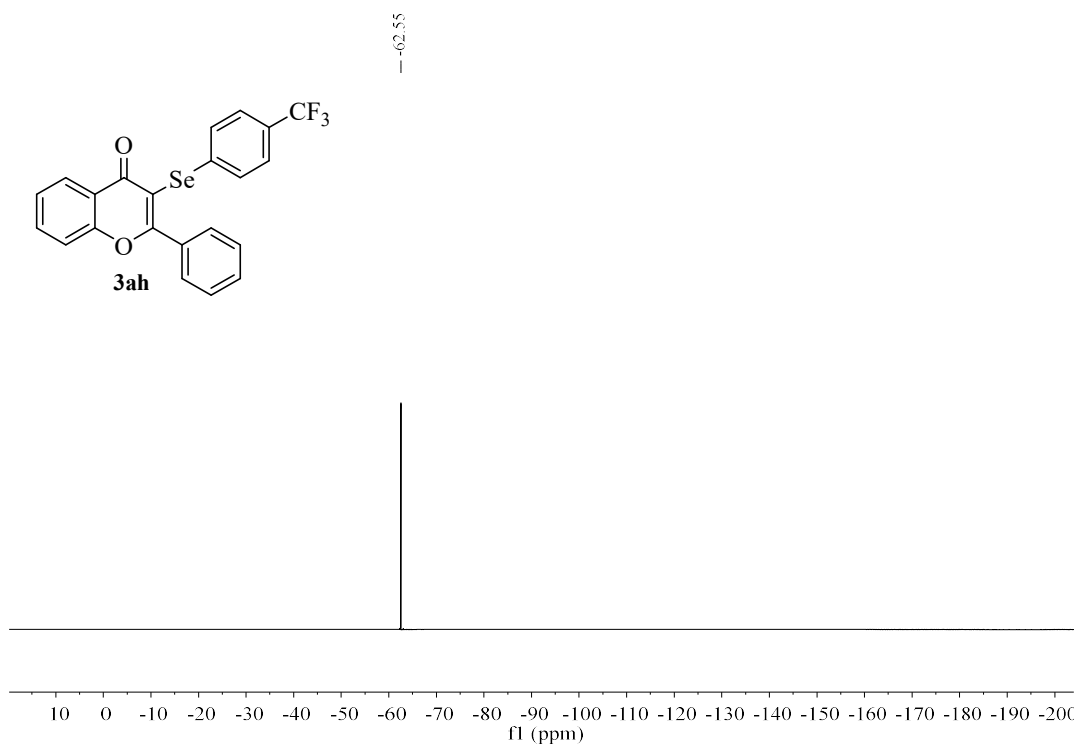

**Figure S31**  $^{19}\text{F}$  NMR (376.3 MHz) spectrum of **3ah** in  $\text{CDCl}_3$

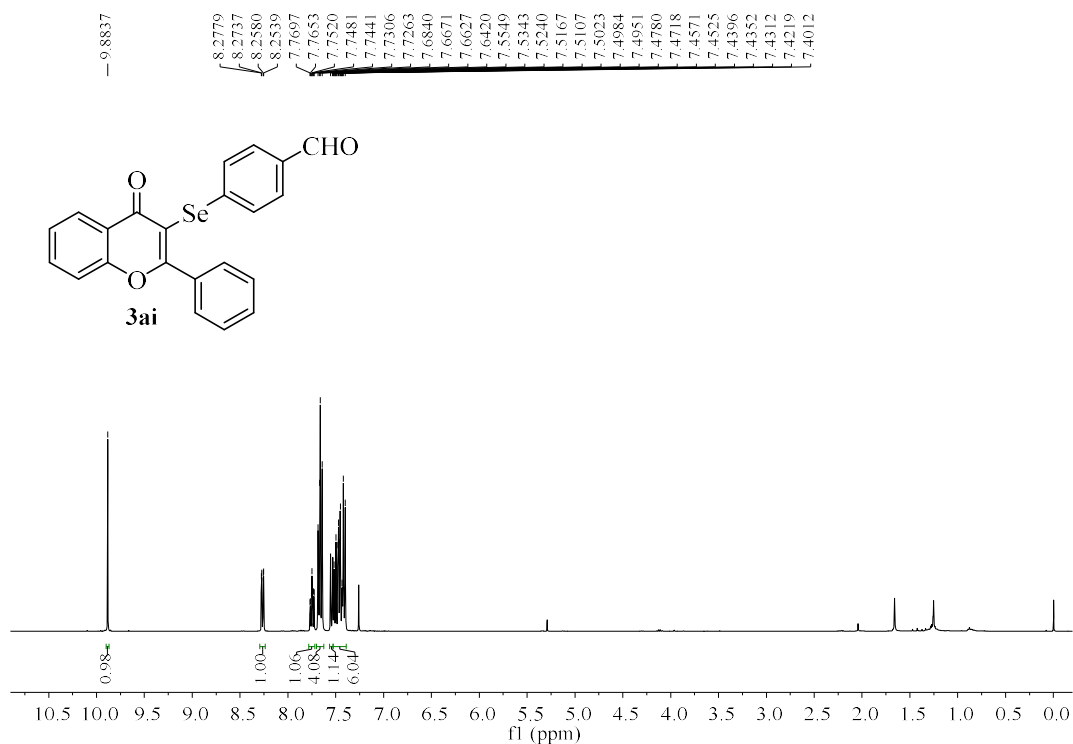

**Figure S32** <sup>1</sup>H NMR (400 MHz) spectrum of **3ai** in CDCl<sub>3</sub>

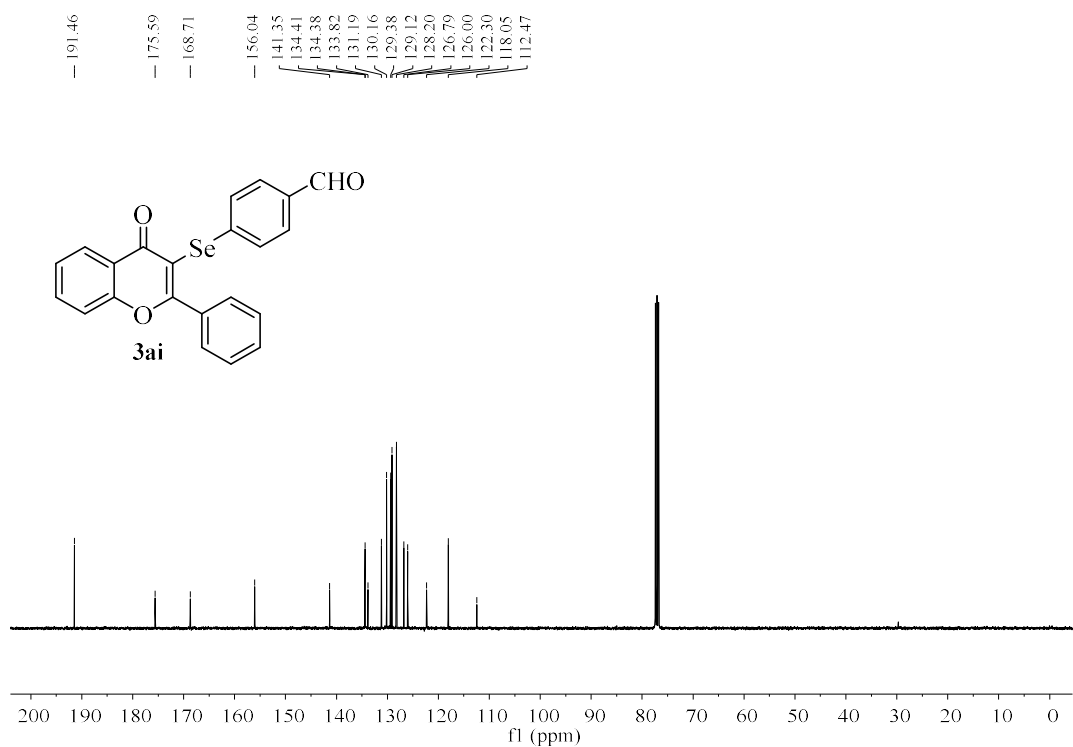

**Figure S33** <sup>13</sup>C NMR (100 MHz) spectrum of **3ai** in CDCl<sub>3</sub>

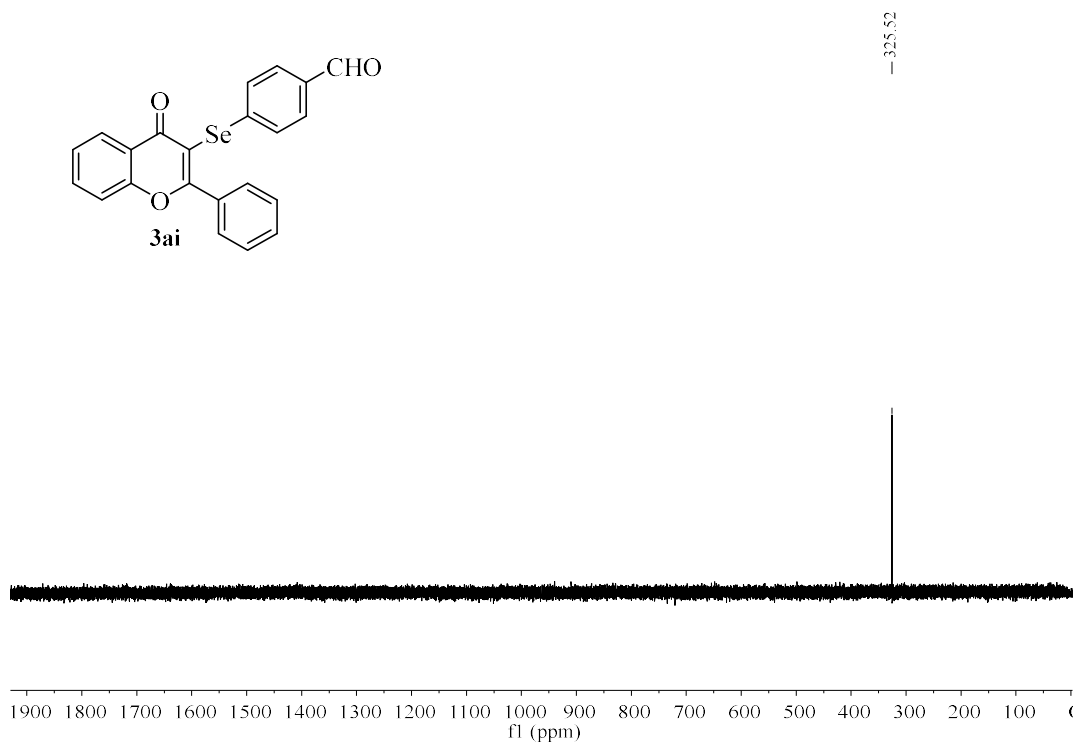

**Figure S34**  $^{77}\text{Se}$  NMR (95.5 MHz) spectrum of **3ai** in  $\text{CDCl}_3$

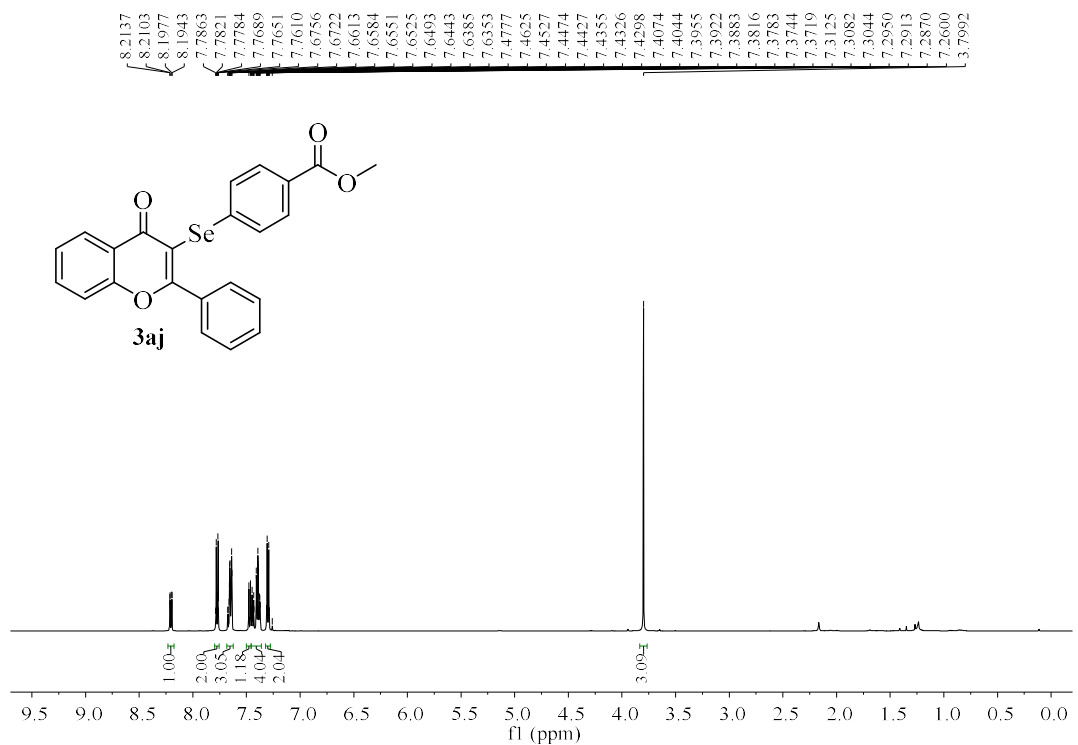

**Figure S35**  $^1\text{H}$  NMR (500 MHz) spectrum of **3aj** in  $\text{CDCl}_3$

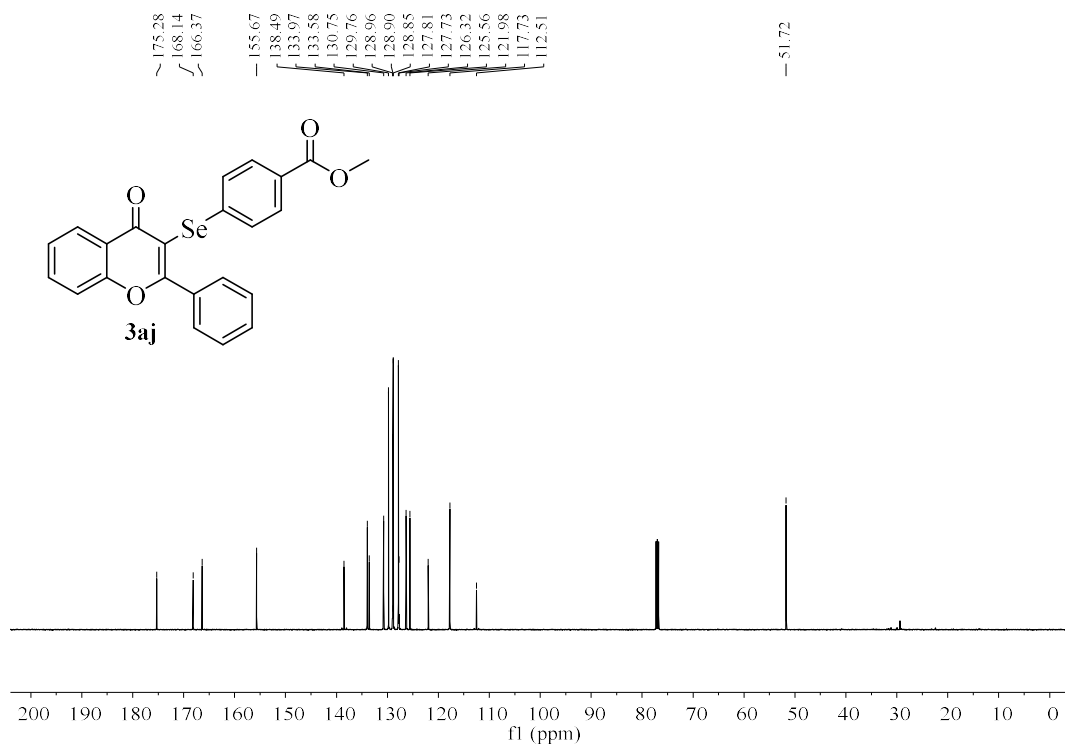

**Figure S36** <sup>13</sup>C NMR (125 MHz) spectrum of **3aj** in CDCl<sub>3</sub>

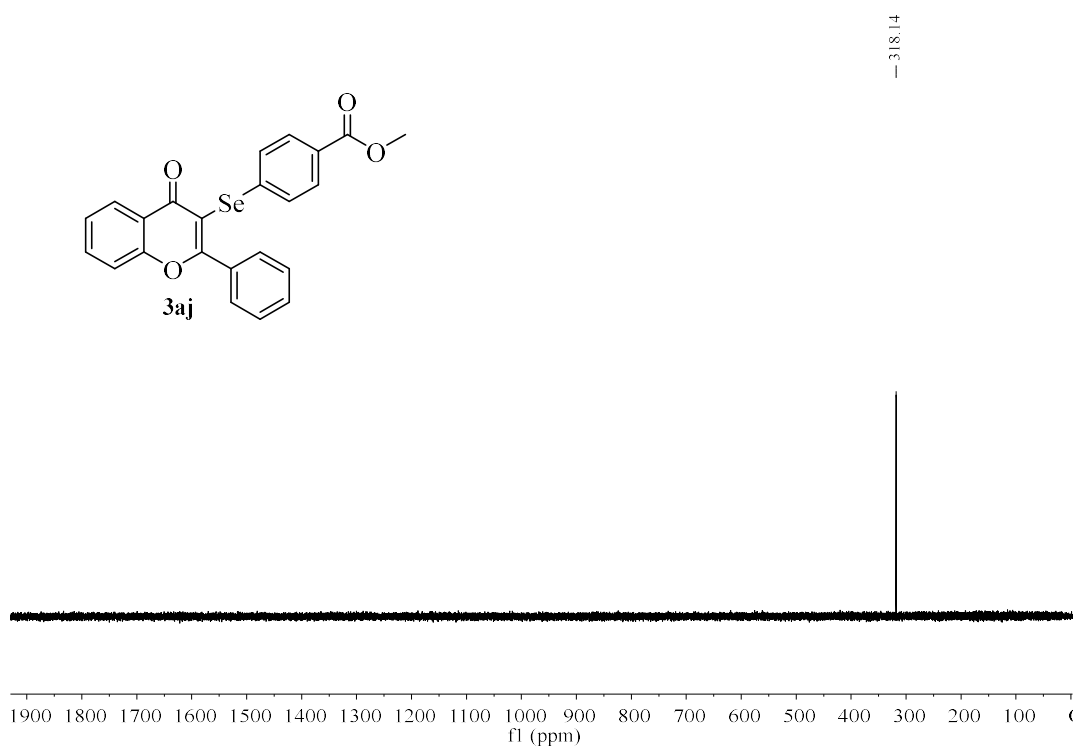

**Figure S37** <sup>77</sup>Se NMR (95.5 MHz) spectrum of **3aj** in CDCl<sub>3</sub>

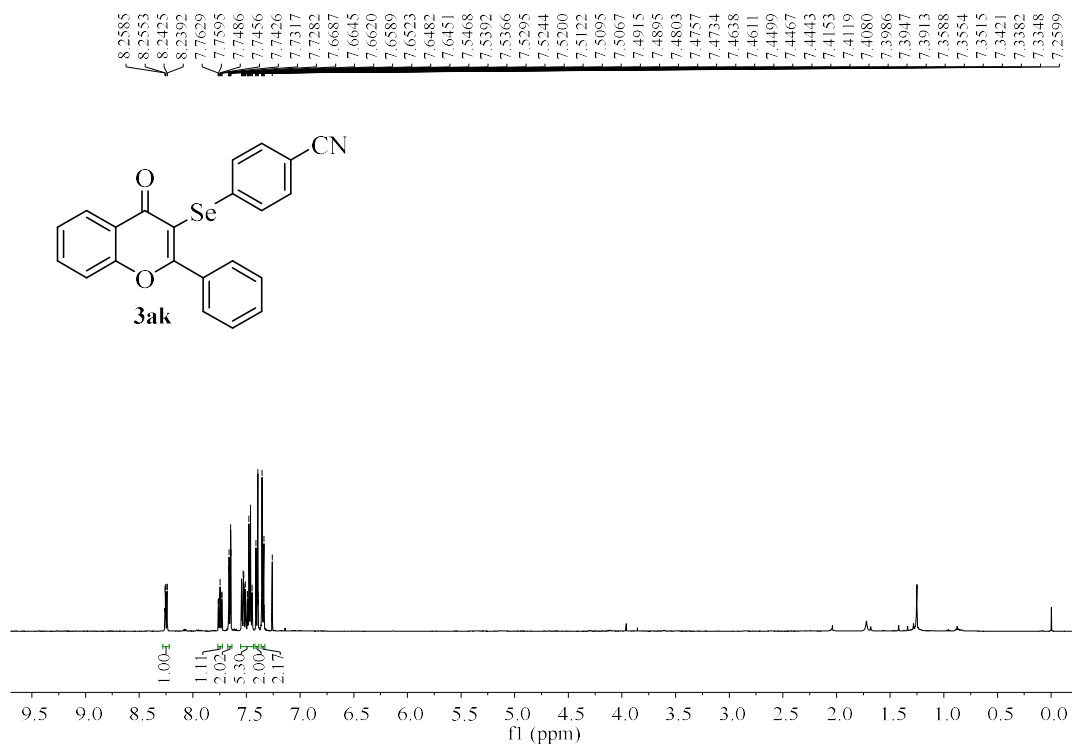

Figure S38 <sup>1</sup>H NMR (500 MHz) spectrum of **3ak** in CDCl<sub>3</sub>

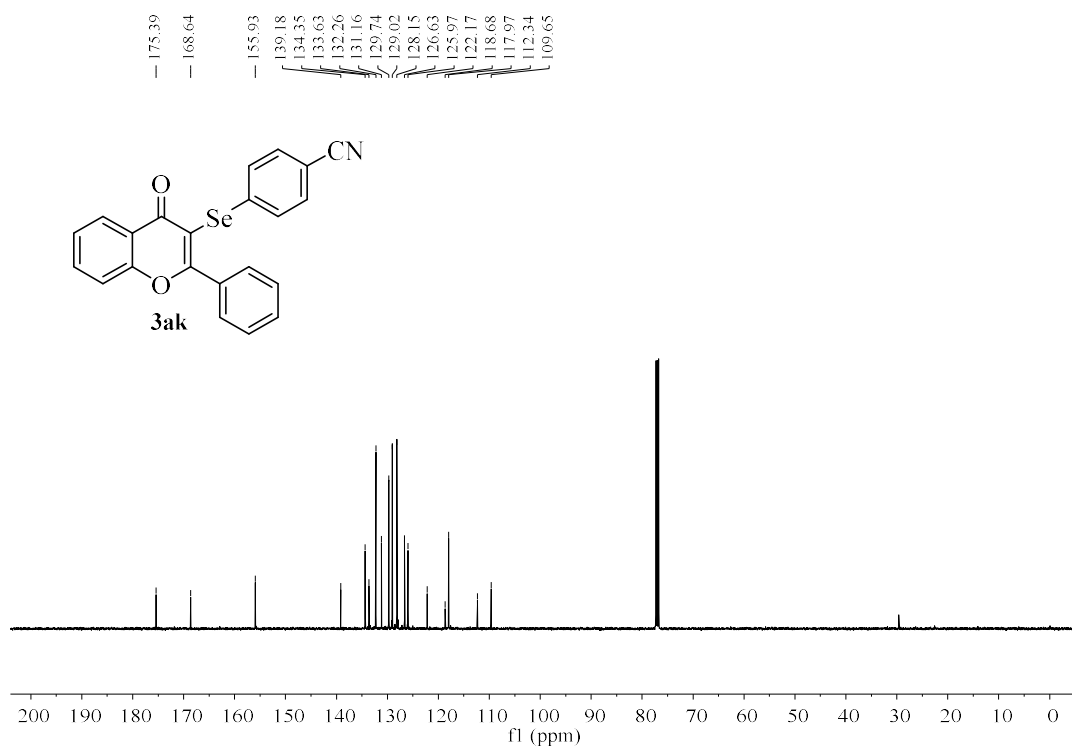

Figure S39 <sup>13</sup>C NMR (125 MHz) spectrum of **3ak** in CDCl<sub>3</sub>



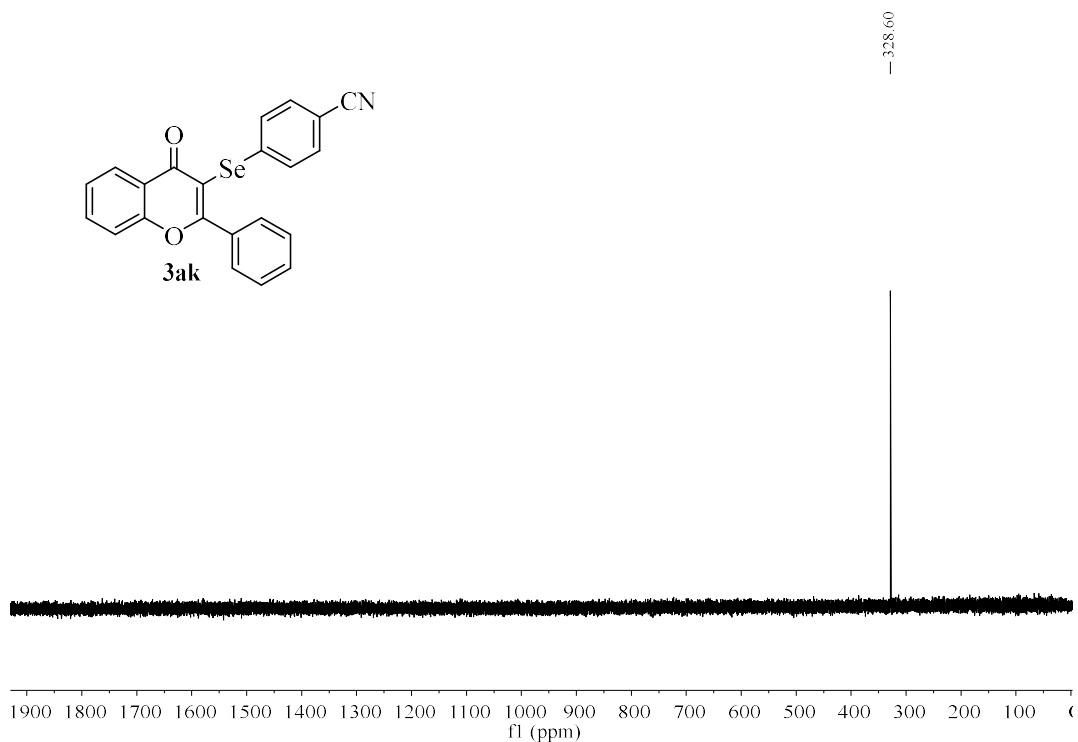

Figure S40 <sup>77</sup>Se NMR (95.5 MHz) spectrum of **3ak** in CDCl<sub>3</sub>

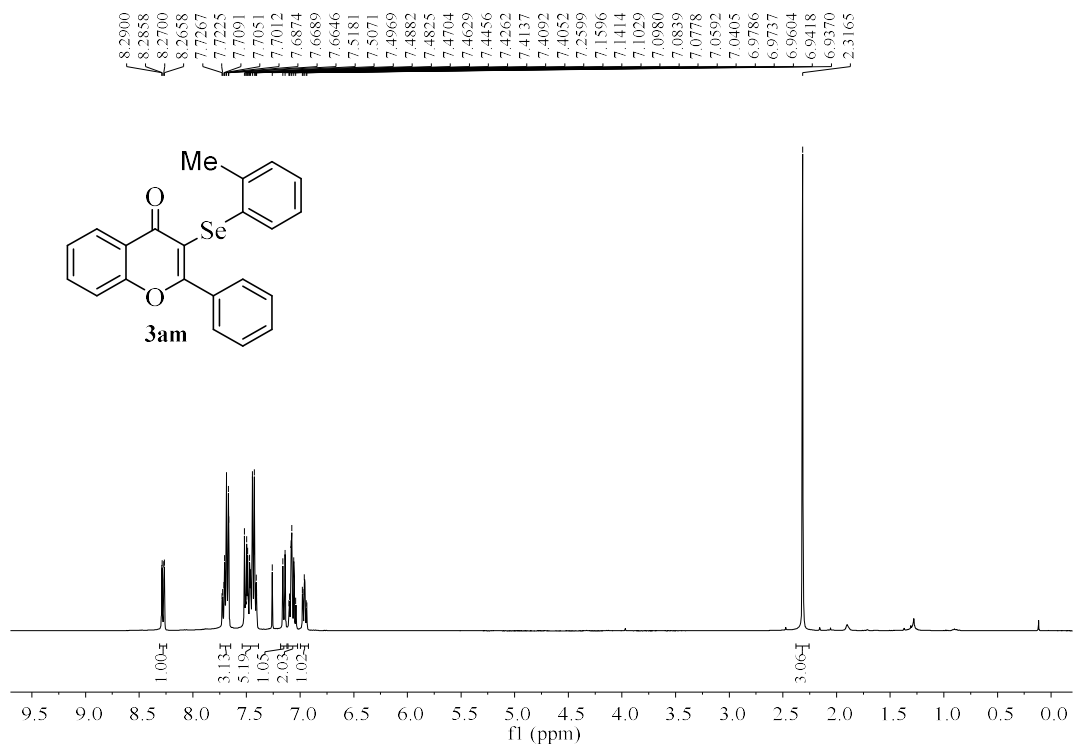

Figure S41 <sup>1</sup>H NMR (400 MHz) spectrum of **3am** in CDCl<sub>3</sub>

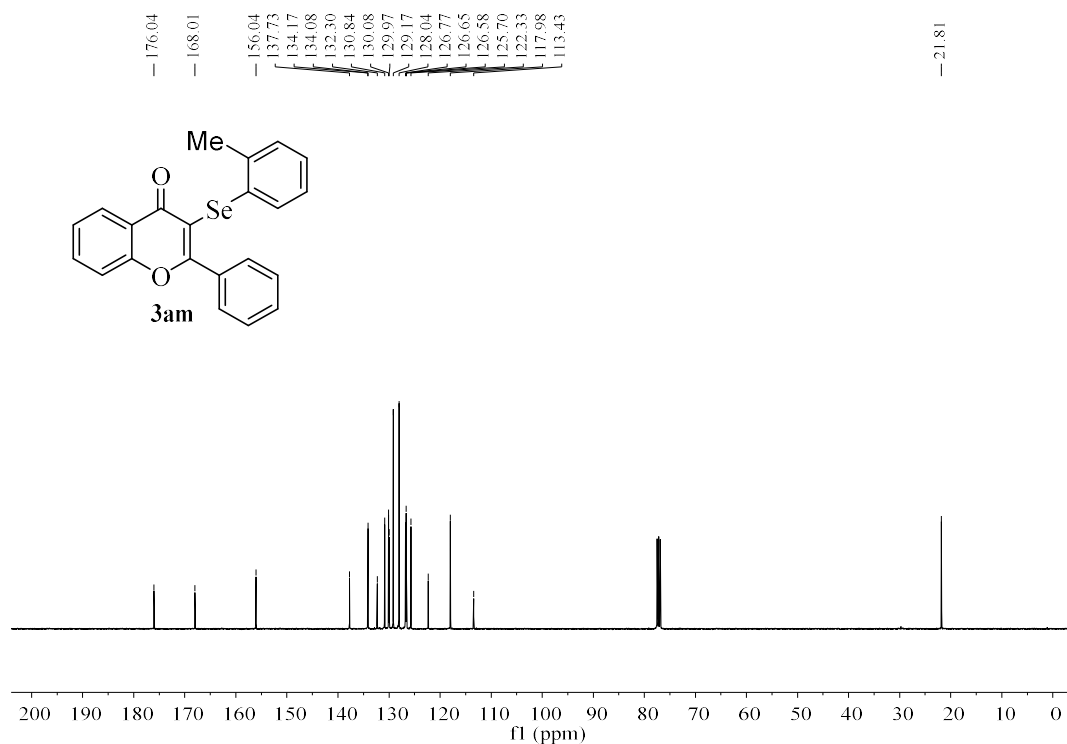

**Figure S42**  $^{13}\text{C}$  NMR (100 MHz) spectrum of **3am** in  $\text{CDCl}_3$

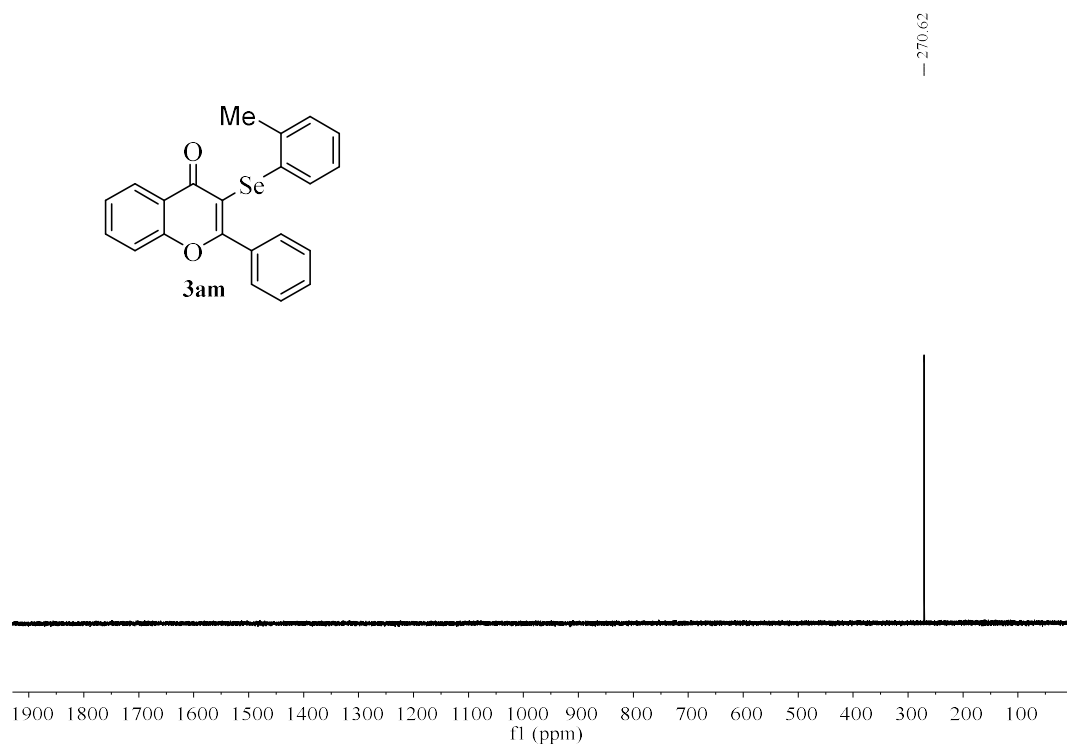

**Figure S43**  $^{77}\text{Se}$  NMR (95.5 MHz) spectrum of **3am** in  $\text{CDCl}_3$

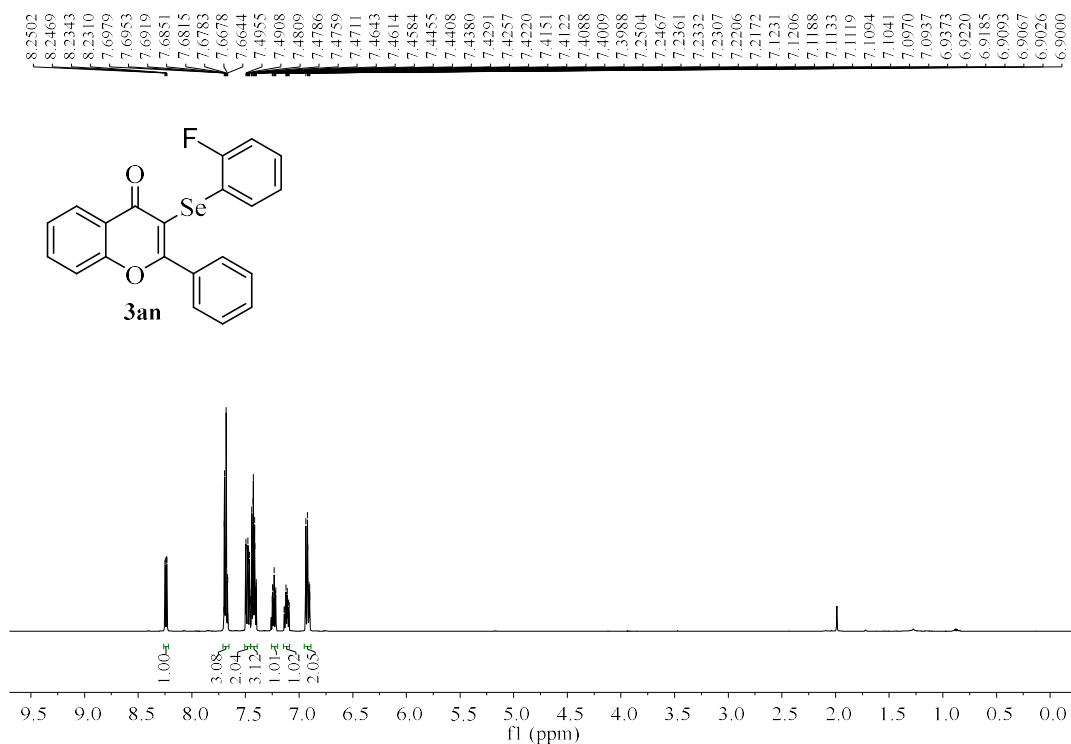

**Figure S44**  $^1\text{H}$  NMR (500 MHz) spectrum of **3an** in  $\text{CDCl}_3$

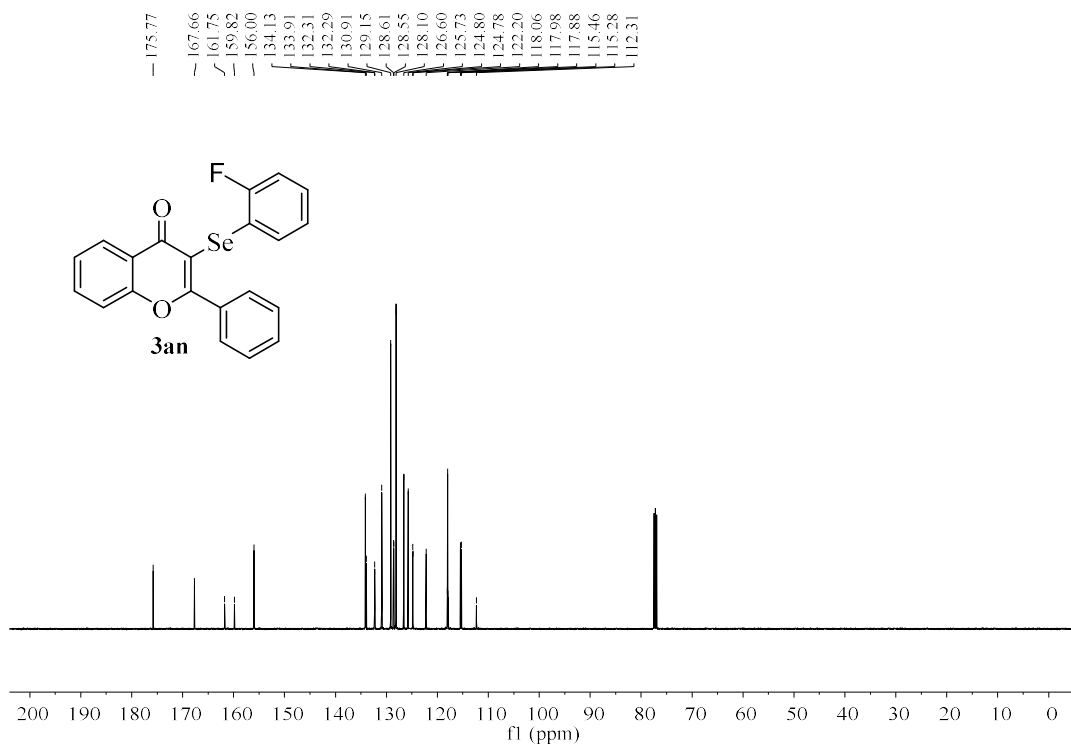

**Figure S45**  $^{13}\text{C}$  NMR (125 MHz) spectrum of **3an** in  $\text{CDCl}_3$

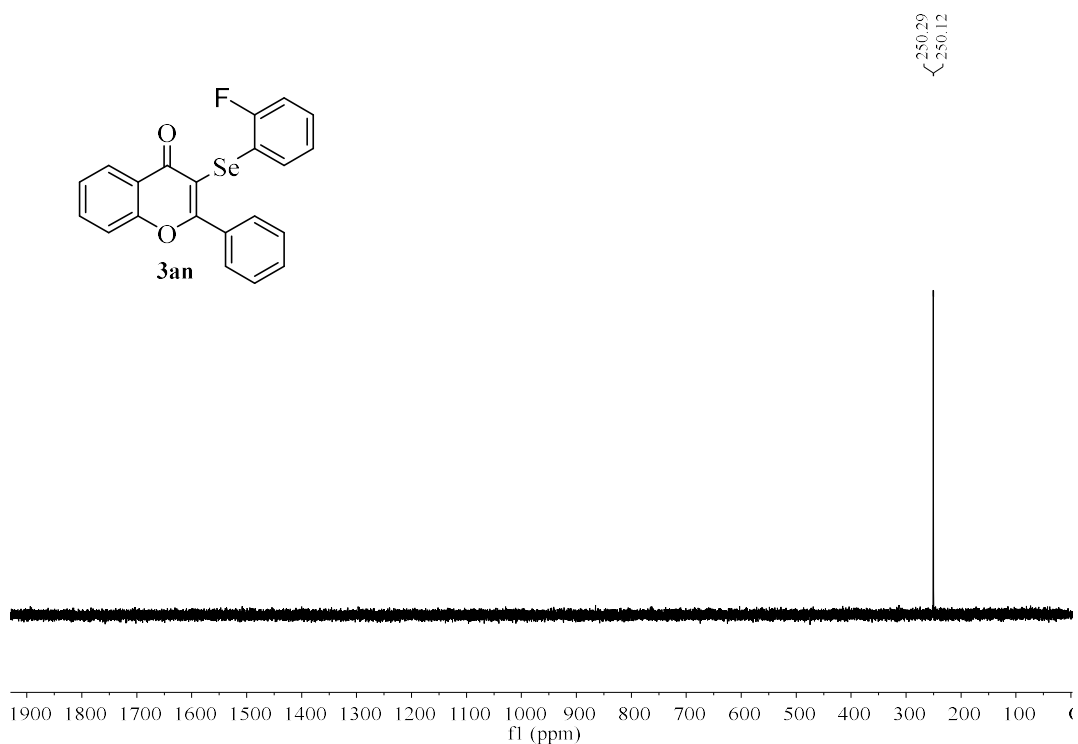

Figure S46 <sup>77</sup>Se NMR (95.5 MHz) spectrum of **3an** in CDCl<sub>3</sub>

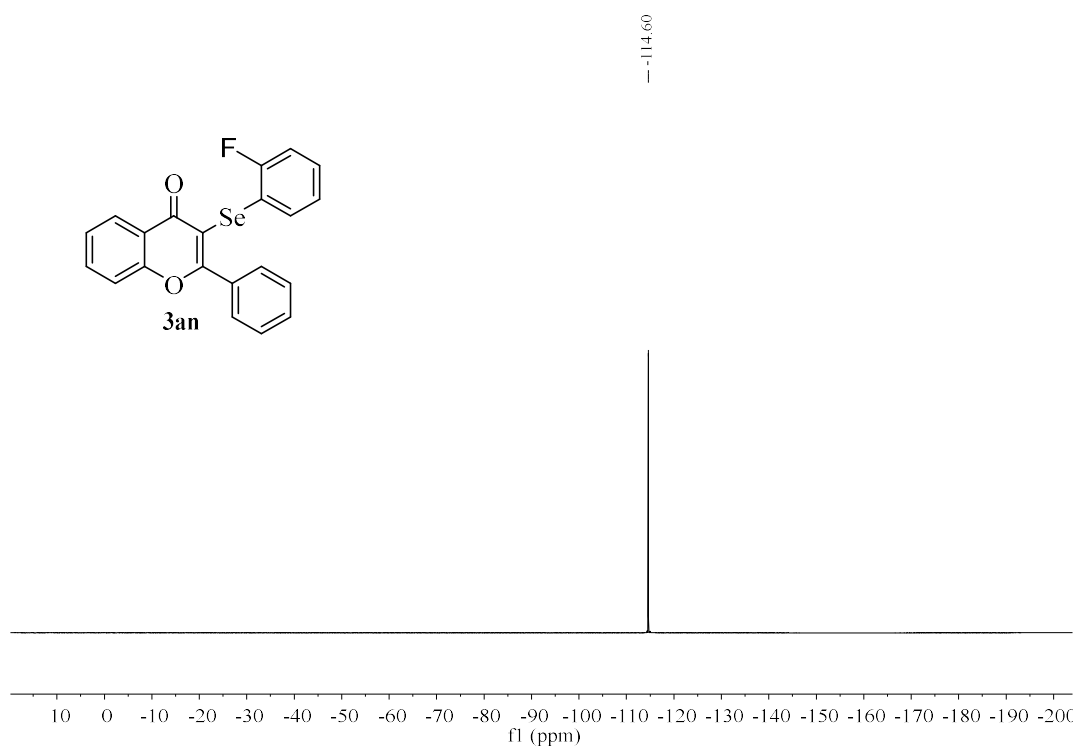

Figure S47 <sup>19</sup>F NMR (376.3 MHz) spectrum of **3an** in CDCl<sub>3</sub>

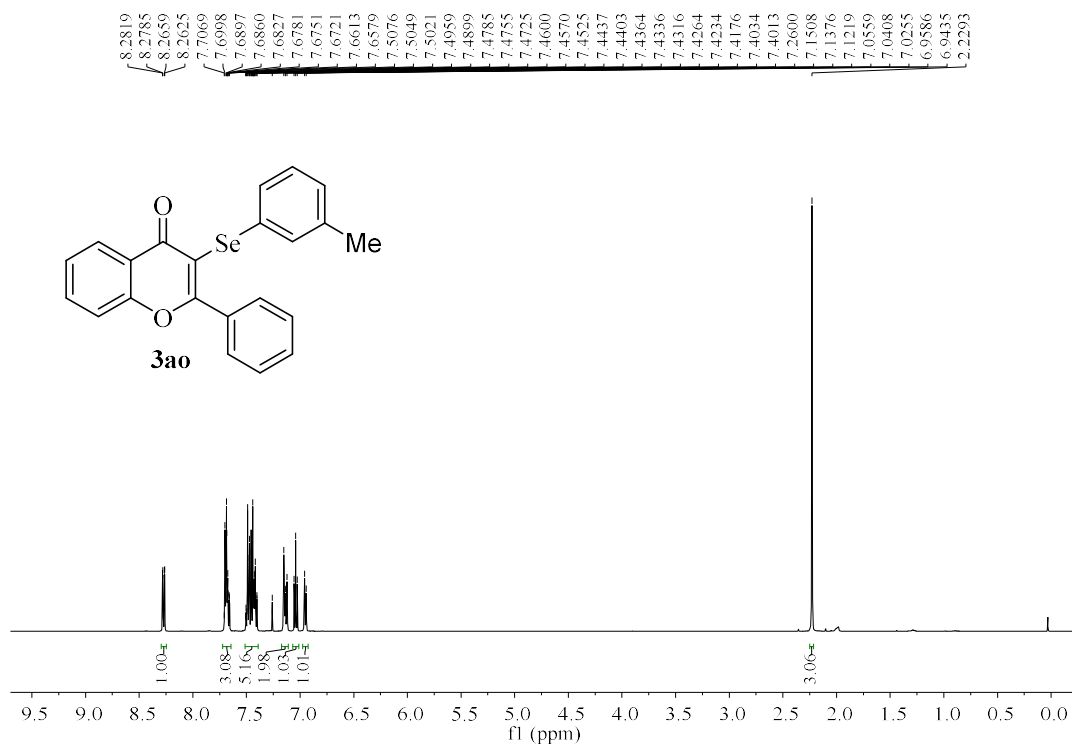

**Figure S48** <sup>1</sup>H NMR (500 MHz) spectrum of **3ao** in CDCl<sub>3</sub>

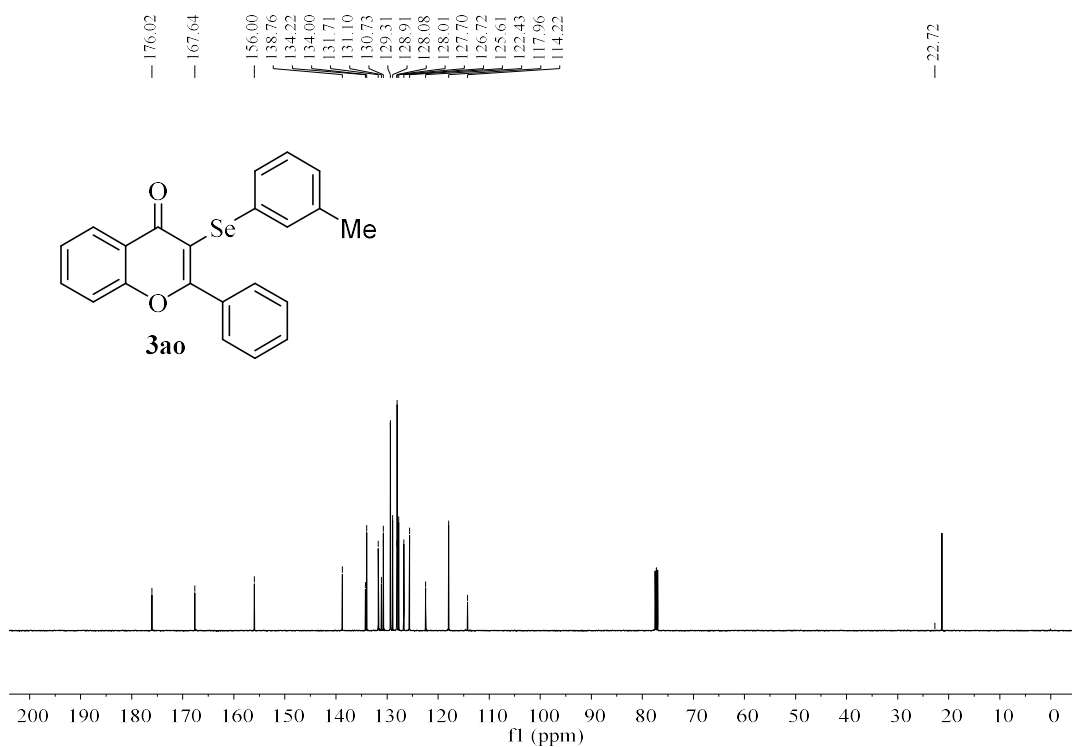

**Figure S49** <sup>13</sup>C NMR (125 MHz) spectrum of **3ao** in CDCl<sub>3</sub>

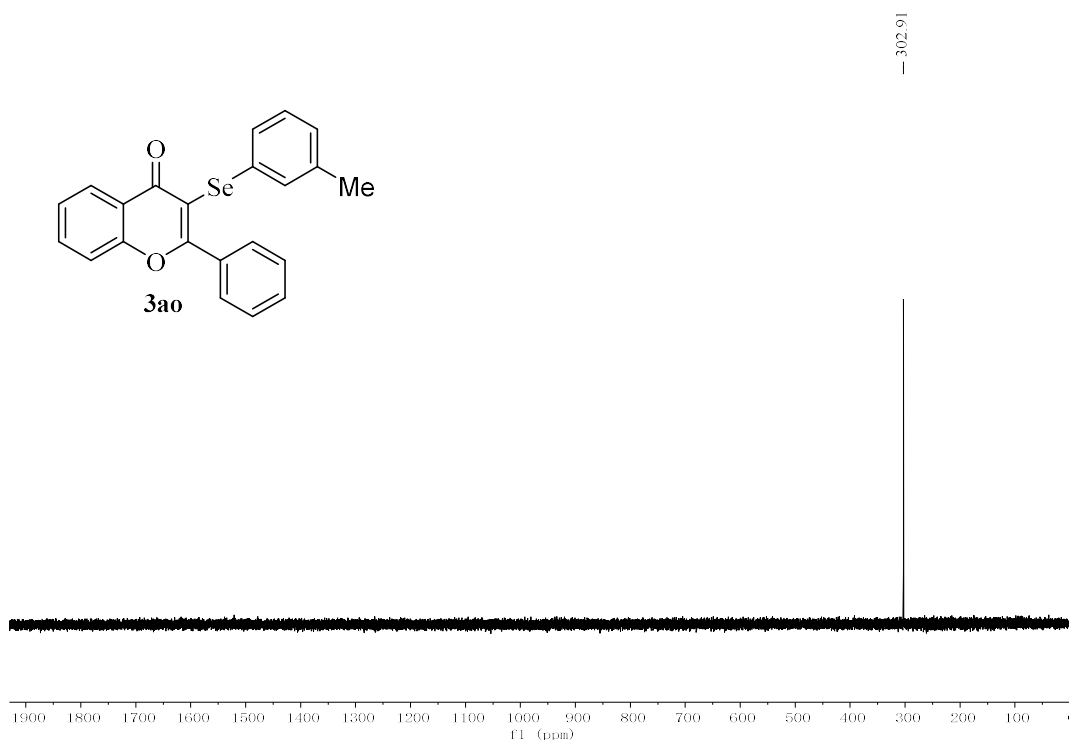

Figure S50 <sup>77</sup>Se NMR (95.5 MHz) spectrum of **3ao** in CDCl<sub>3</sub>

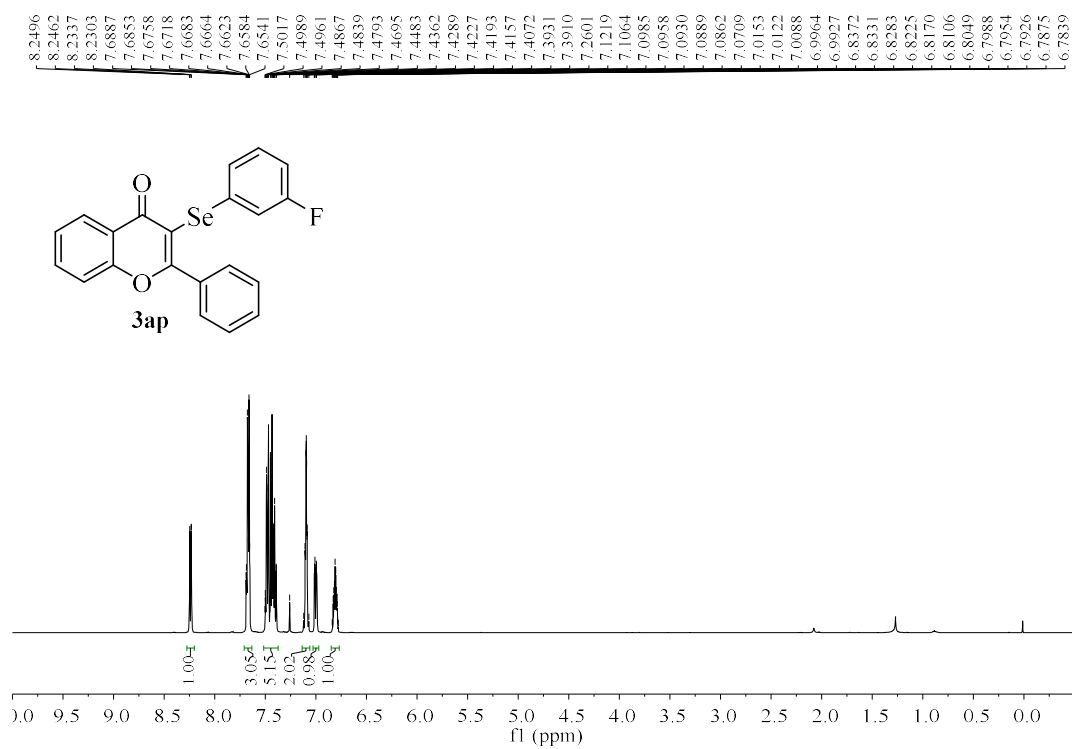

Figure S51 <sup>1</sup>H NMR (500 MHz) spectrum of **3ap** in CDCl<sub>3</sub>

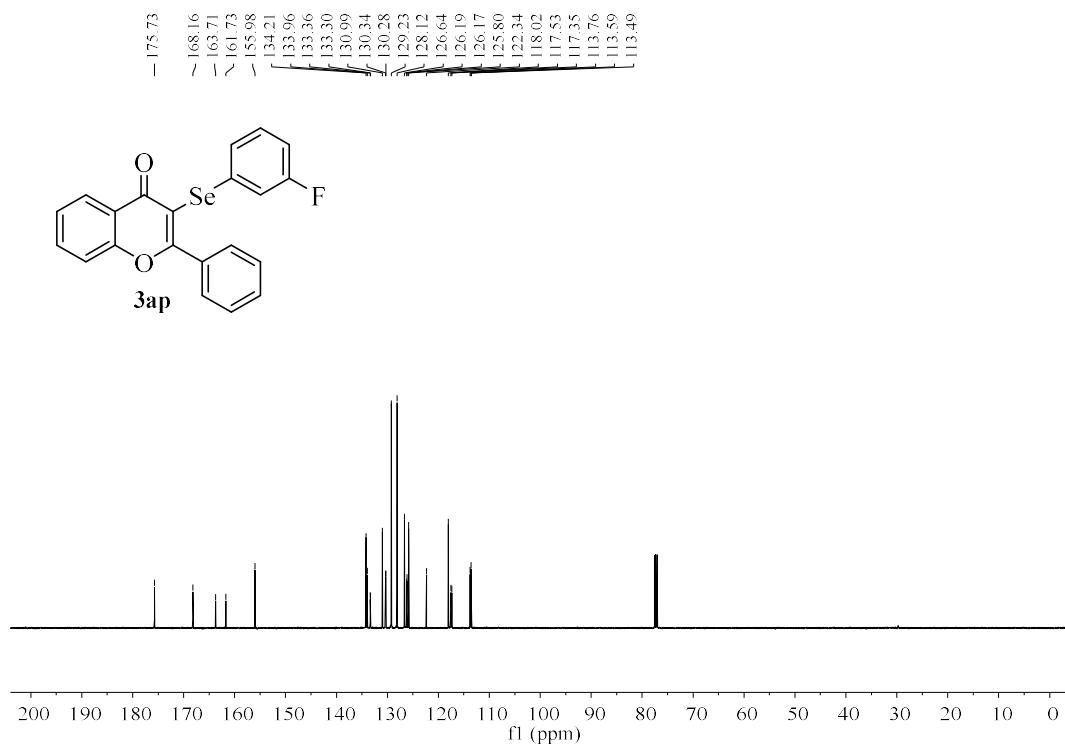

**Figure S52**  $^{13}\text{C}$  NMR (125 MHz) spectrum of **3ap** in  $\text{CDCl}_3$

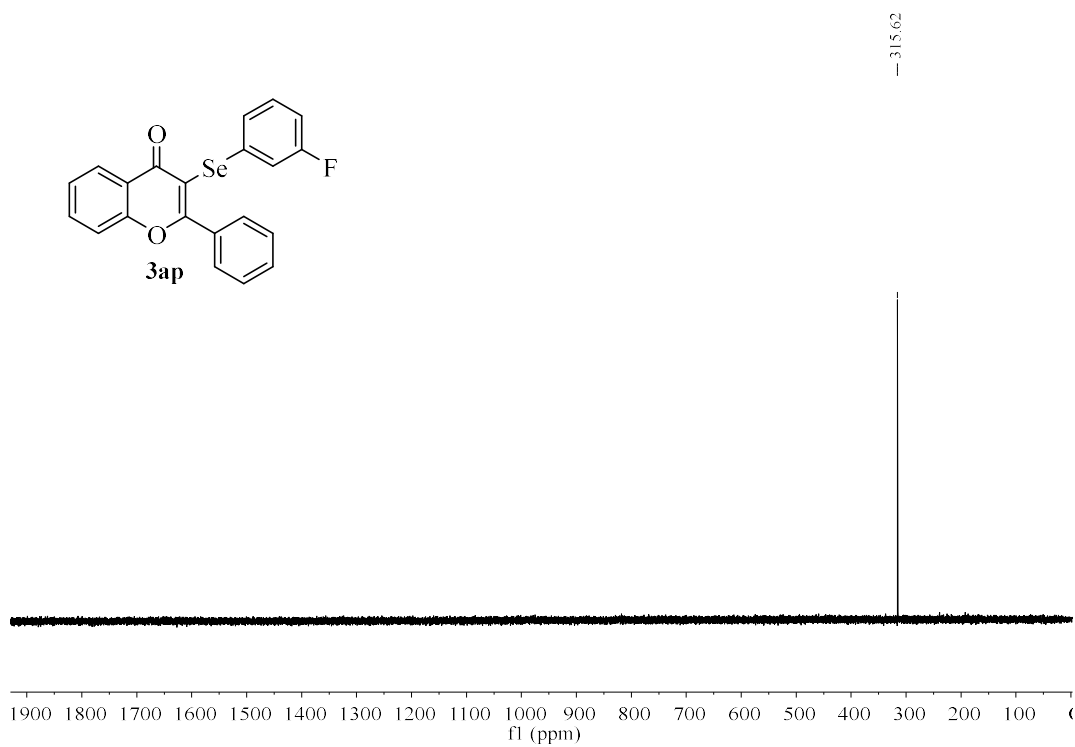

**Figure S53**  $^{77}\text{Se}$  NMR (95.5 MHz) spectrum of **3ap** in  $\text{CDCl}_3$

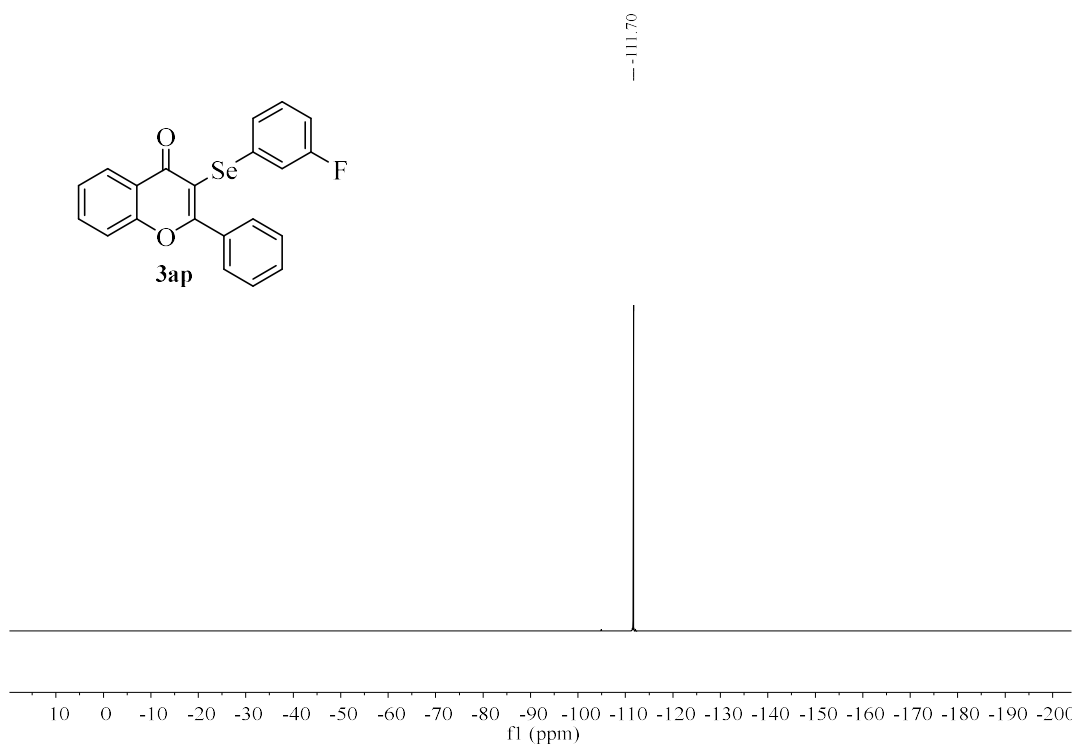

**Figure S54**  $^{19}\text{F}$  NMR (376.3 MHz) spectrum of **3ap** in  $\text{CDCl}_3$

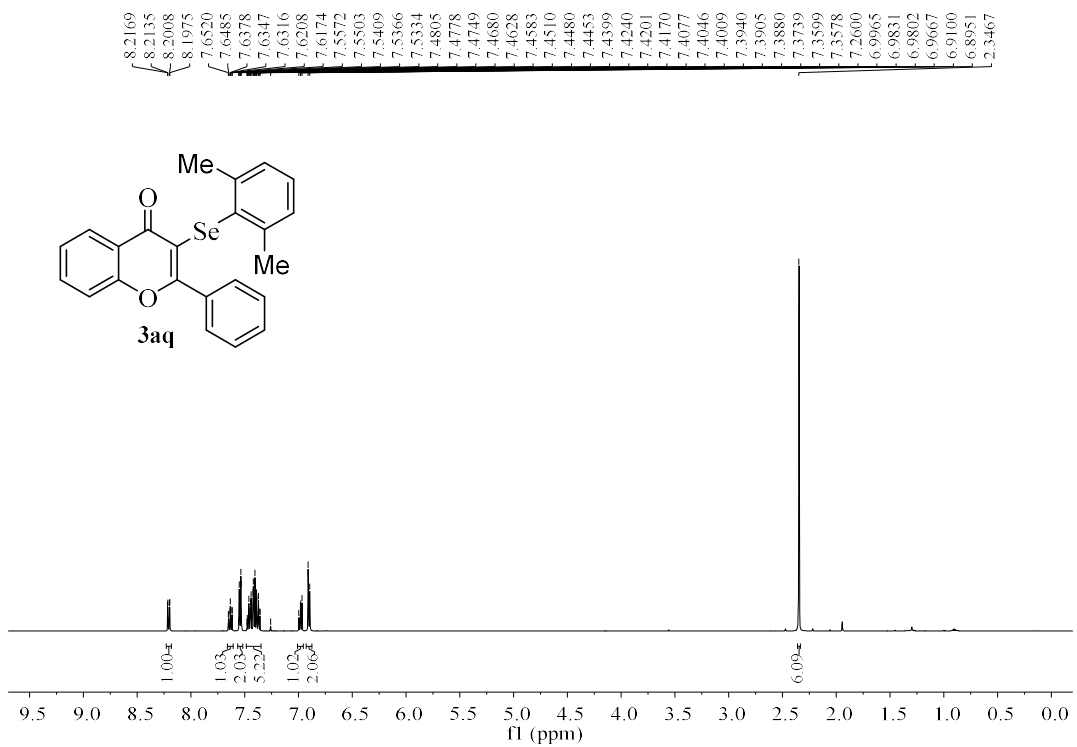

**Figure S55**  $^1\text{H}$  NMR (500 MHz) spectrum of **3aq** in  $\text{CDCl}_3$



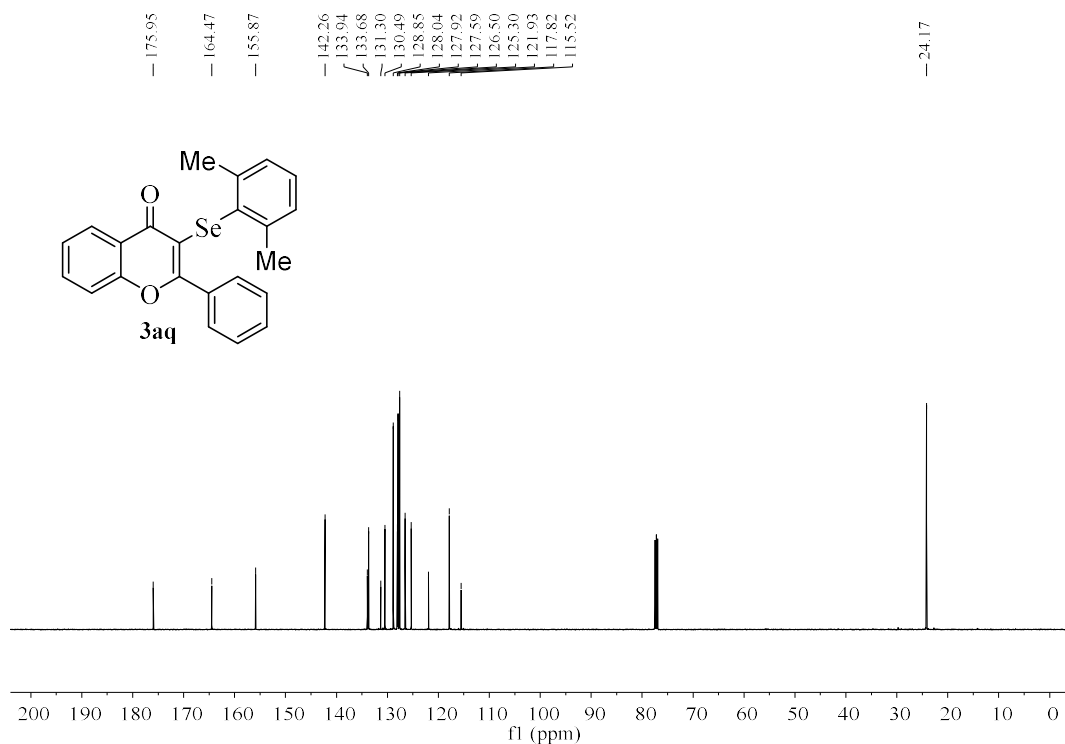

**Figure S56**  $^{13}\text{C}$  NMR (125 MHz) spectrum of **3aq** in  $\text{CDCl}_3$

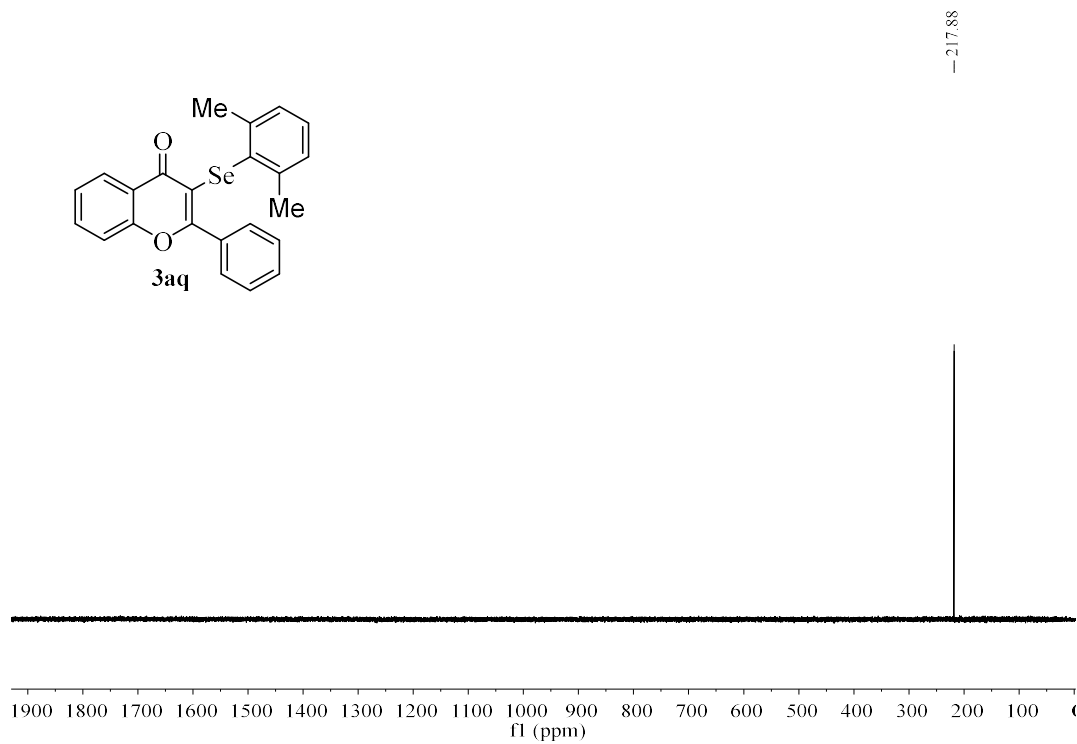

**Figure S57**  $^{77}\text{Se}$  NMR (95.5 MHz) spectrum of **3aq** in  $\text{CDCl}_3$

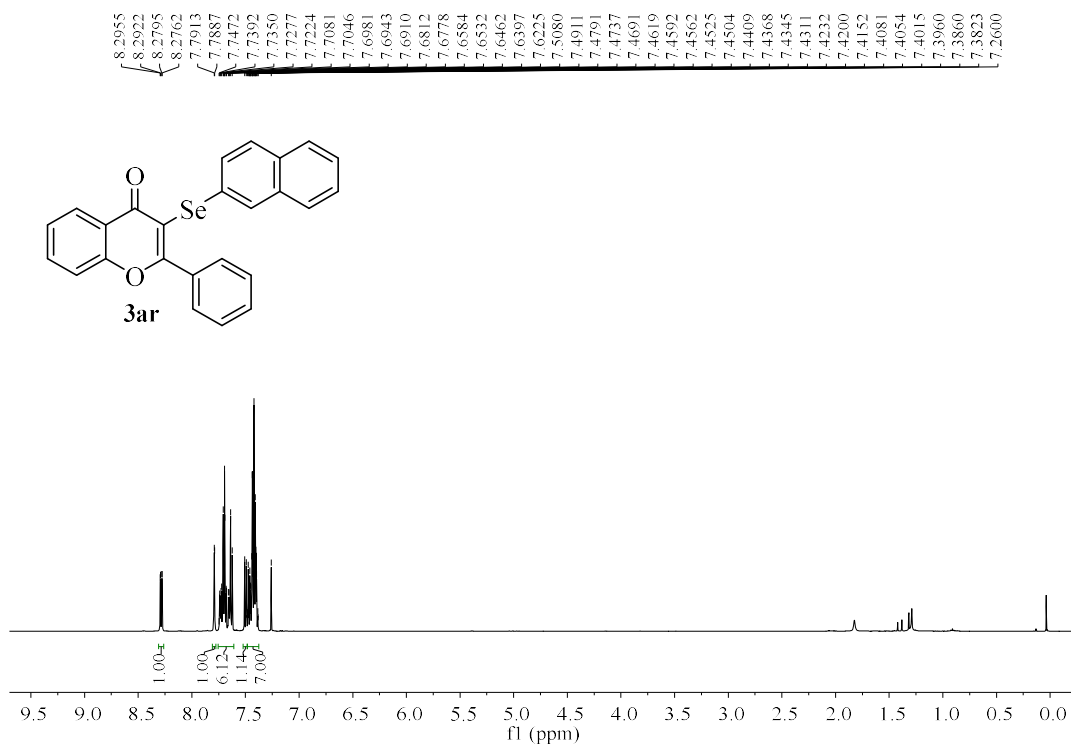

**Figure S58**  $^1\text{H}$  NMR (500 MHz) spectrum of **3ar** in  $\text{CDCl}_3$

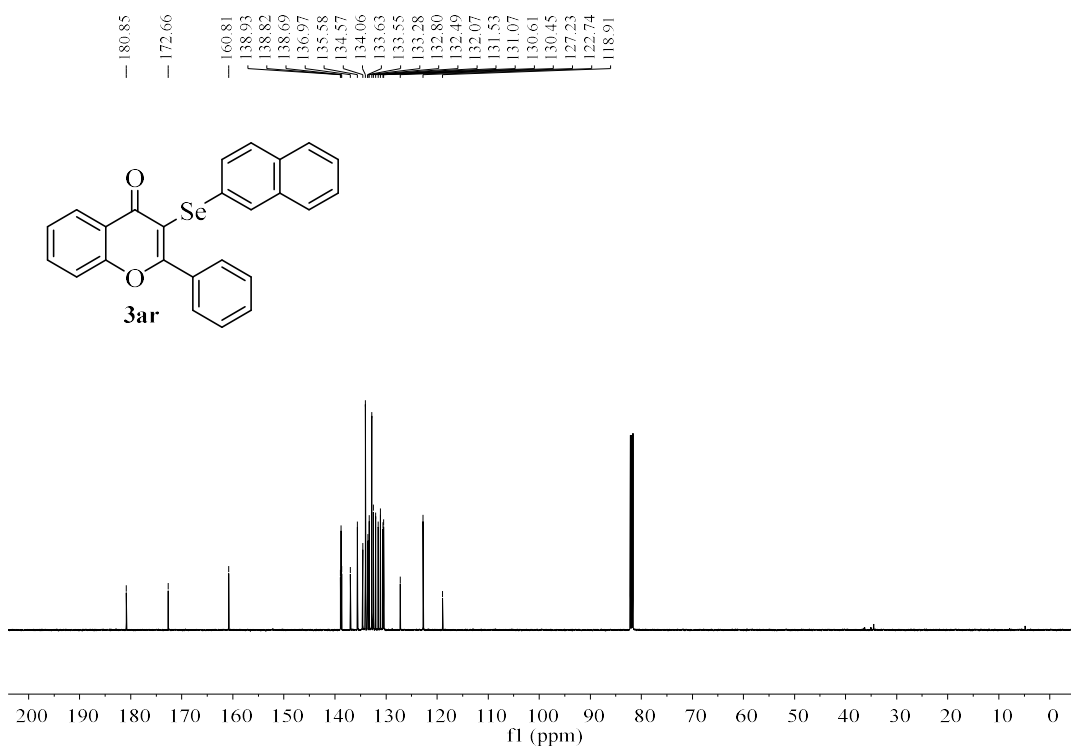

**Figure S59**  $^{13}\text{C}$  NMR (125 MHz) spectrum of **3ar** in  $\text{CDCl}_3$

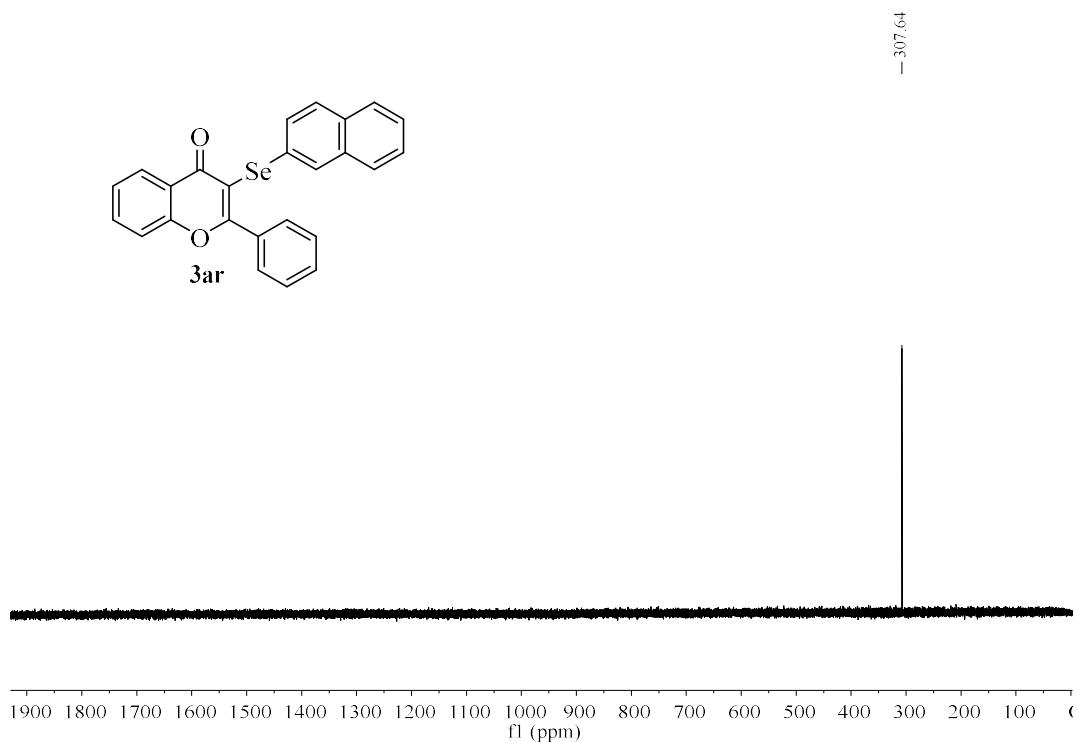

**Figure S60**  $^{77}\text{Se}$  NMR (95.5 MHz) spectrum of **3ar** in  $\text{CDCl}_3$

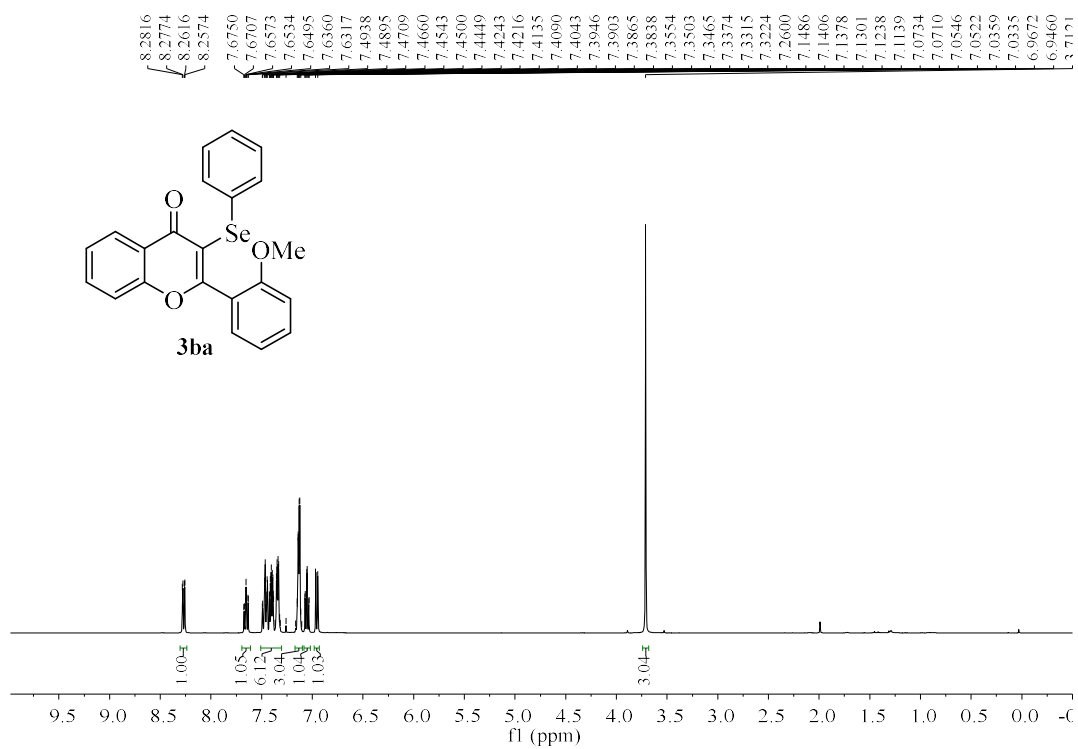

**Figure S61**  $^1\text{H}$  NMR (400 MHz) spectrum of **3ba** in  $\text{CDCl}_3$

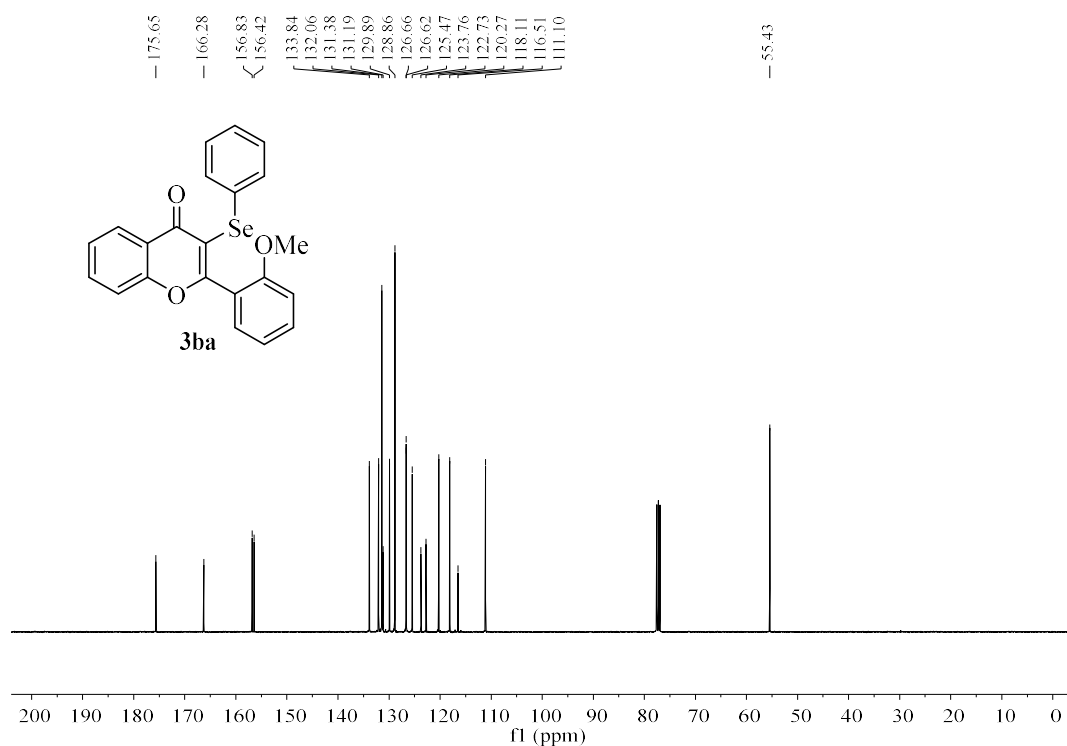

**Figure S62** <sup>13</sup>C NMR (100 MHz) spectrum of **3ba** in CDCl<sub>3</sub>

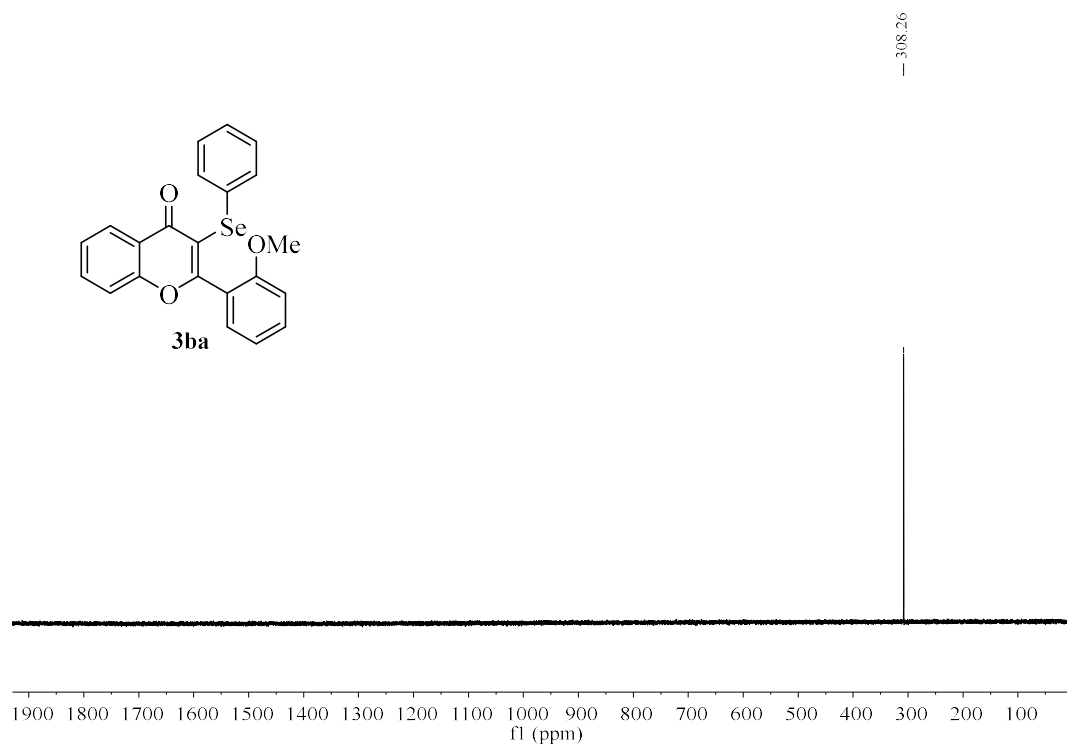

**Figure S63** <sup>77</sup>Se NMR (95.5 MHz) spectrum of **3ba** in CDCl<sub>3</sub>

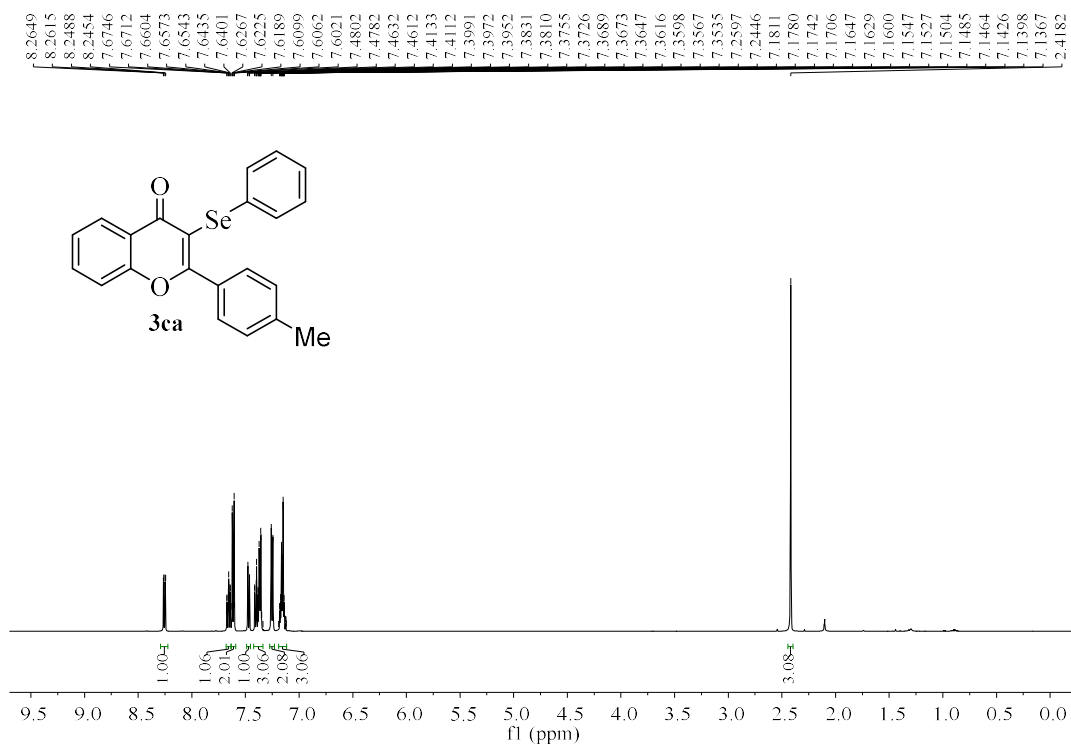

**Figure S64**  $^1\text{H}$  NMR (500 MHz) spectrum of **3ca** in  $\text{CDCl}_3$

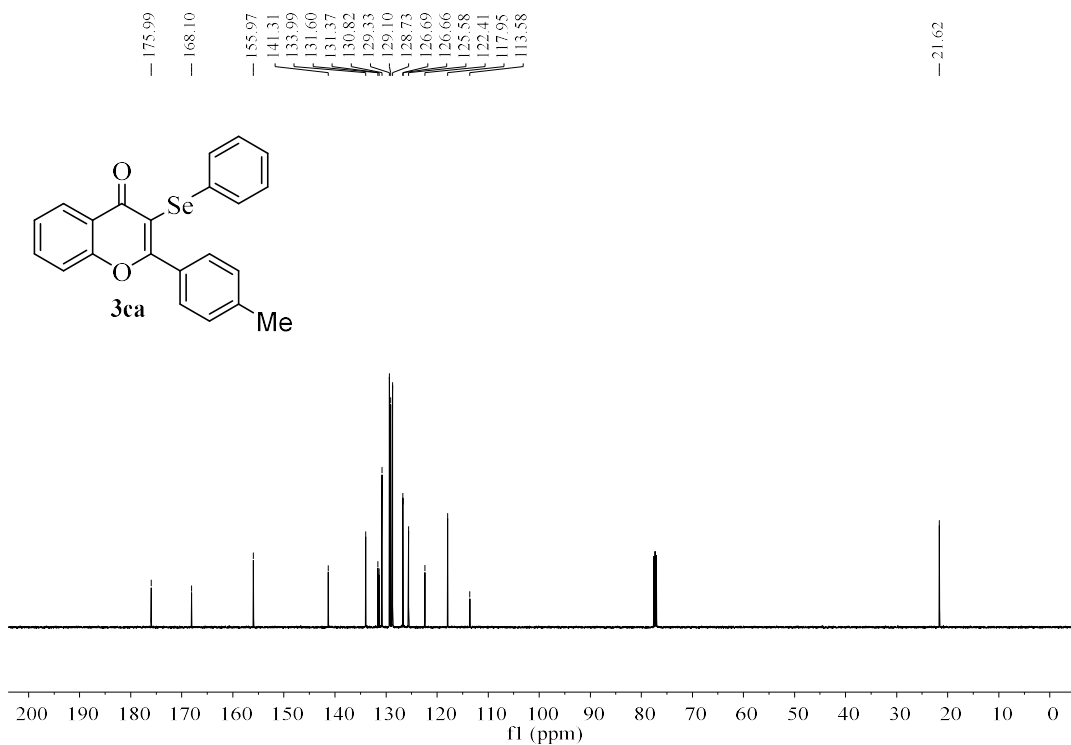

**Figure S65**  $^{13}\text{C}$  NMR (125 MHz) spectrum of **3ca** in  $\text{CDCl}_3$

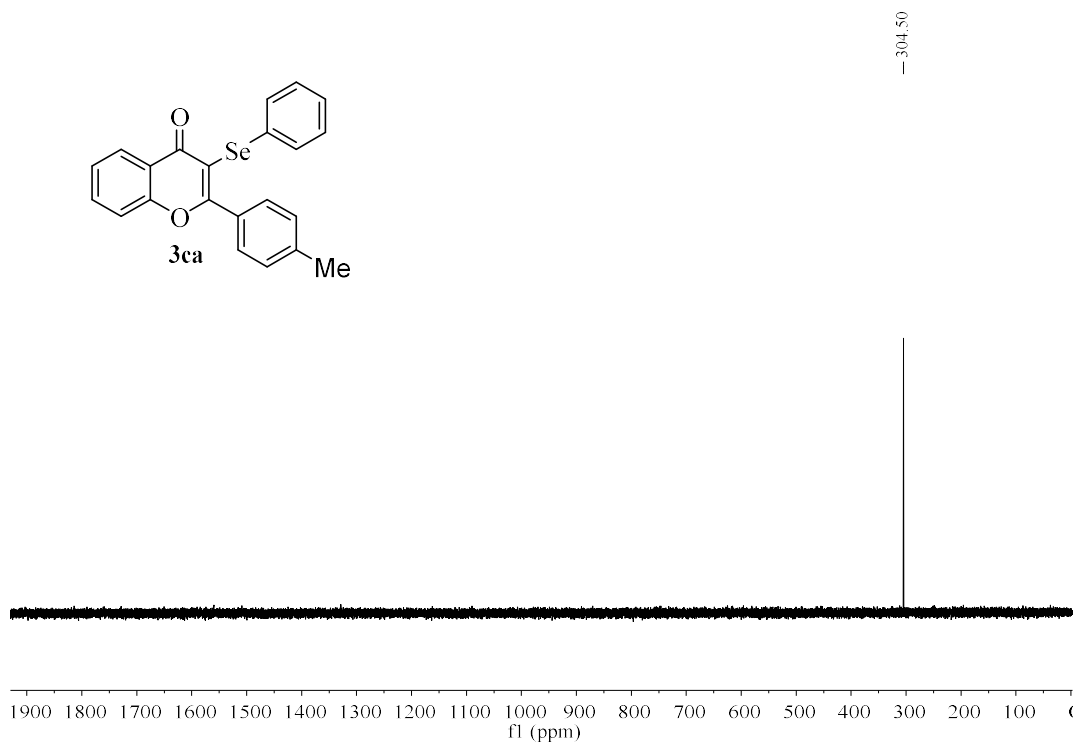

Figure S66  $^{77}\text{Se}$  NMR (95.5 MHz) spectrum of **3ca** in  $\text{CDCl}_3$

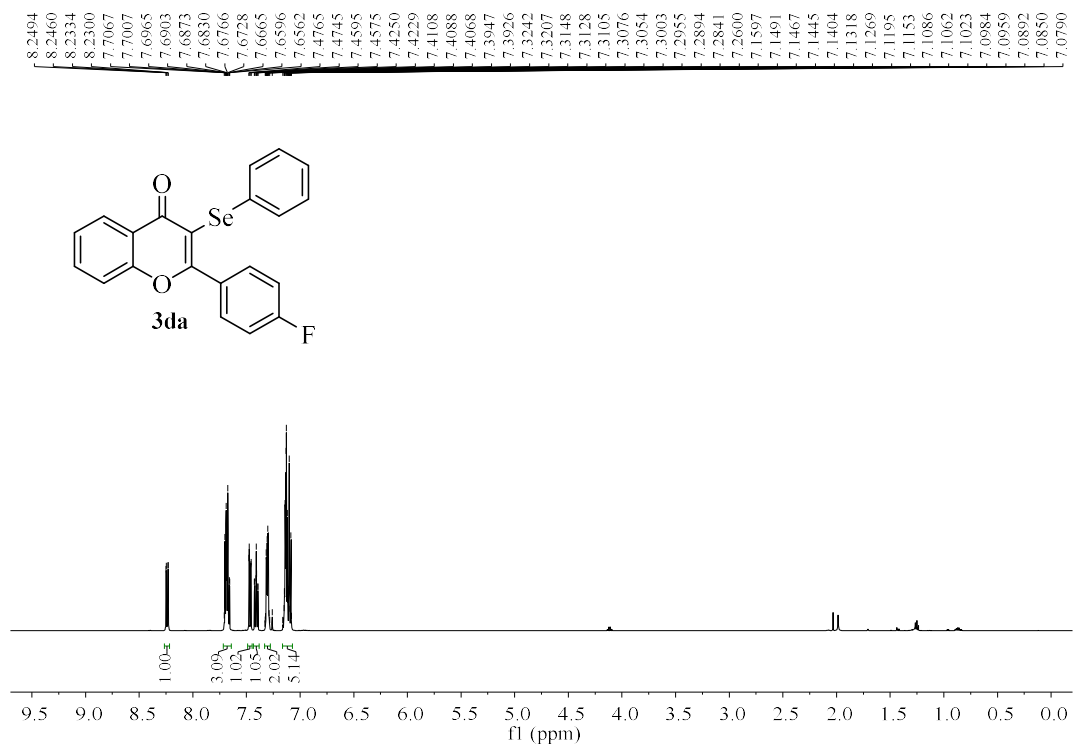

Figure S67  $^1\text{H}$  NMR (500 MHz) spectrum of **3da** in  $\text{CDCl}_3$

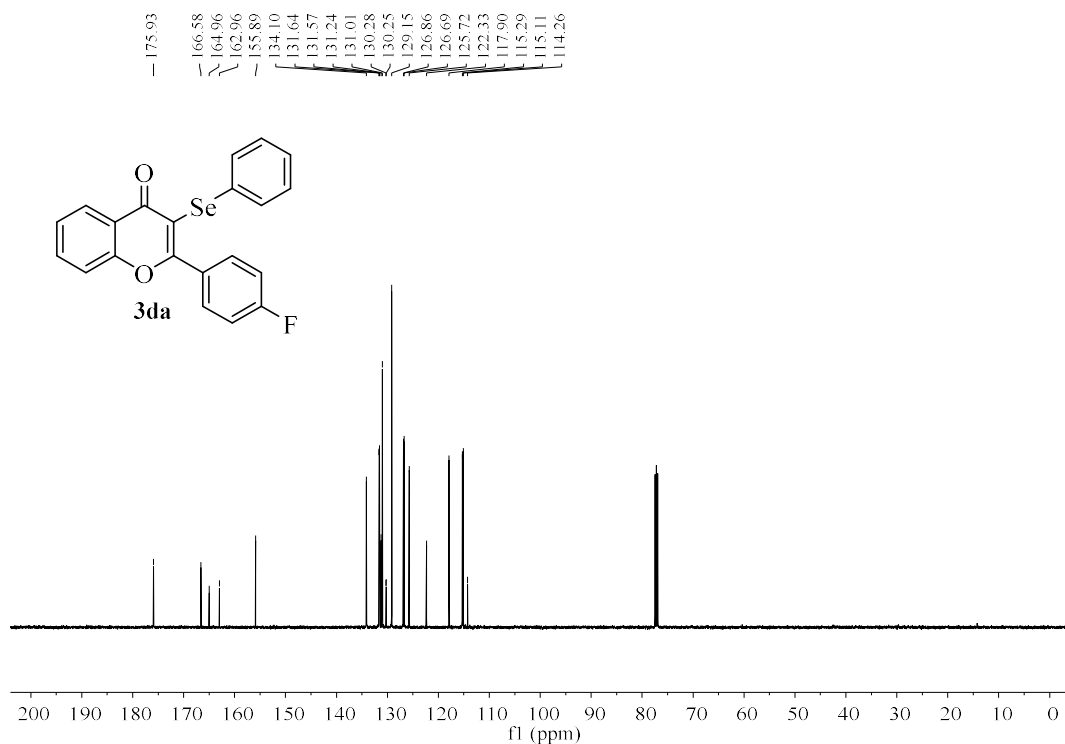

**Figure S68** <sup>13</sup>C NMR (125 MHz) spectrum of **3da** in CDCl<sub>3</sub>

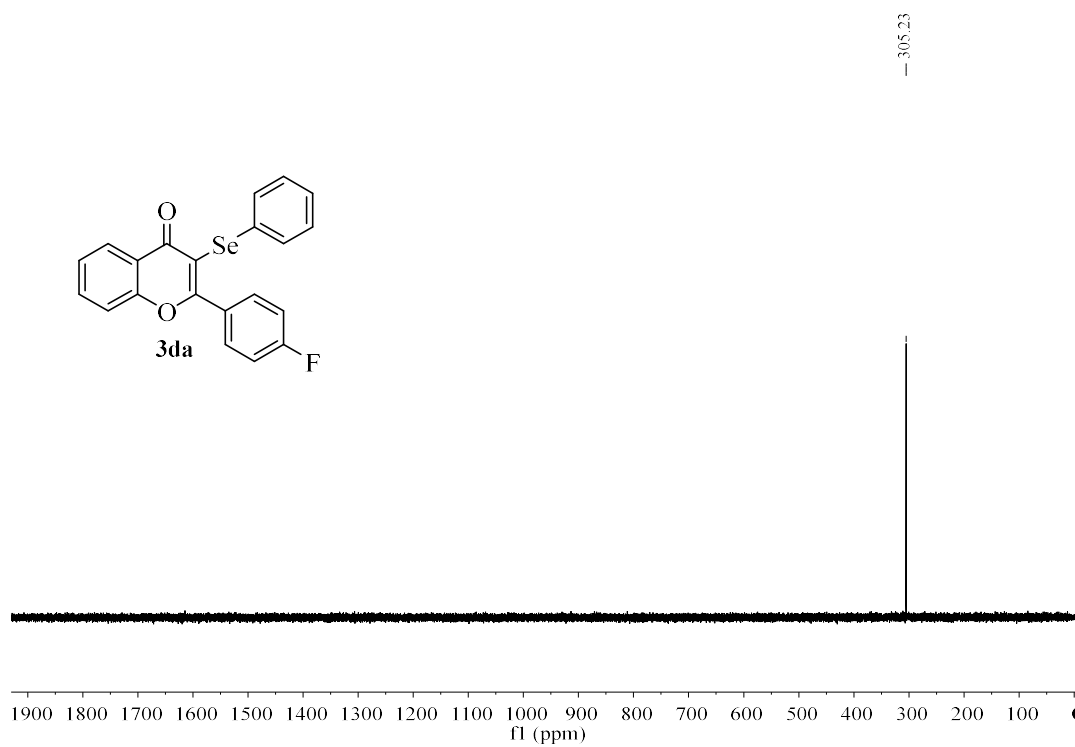

**Figure S69** <sup>77</sup>Se NMR (95.5 MHz) spectrum of **3da** in CDCl<sub>3</sub>

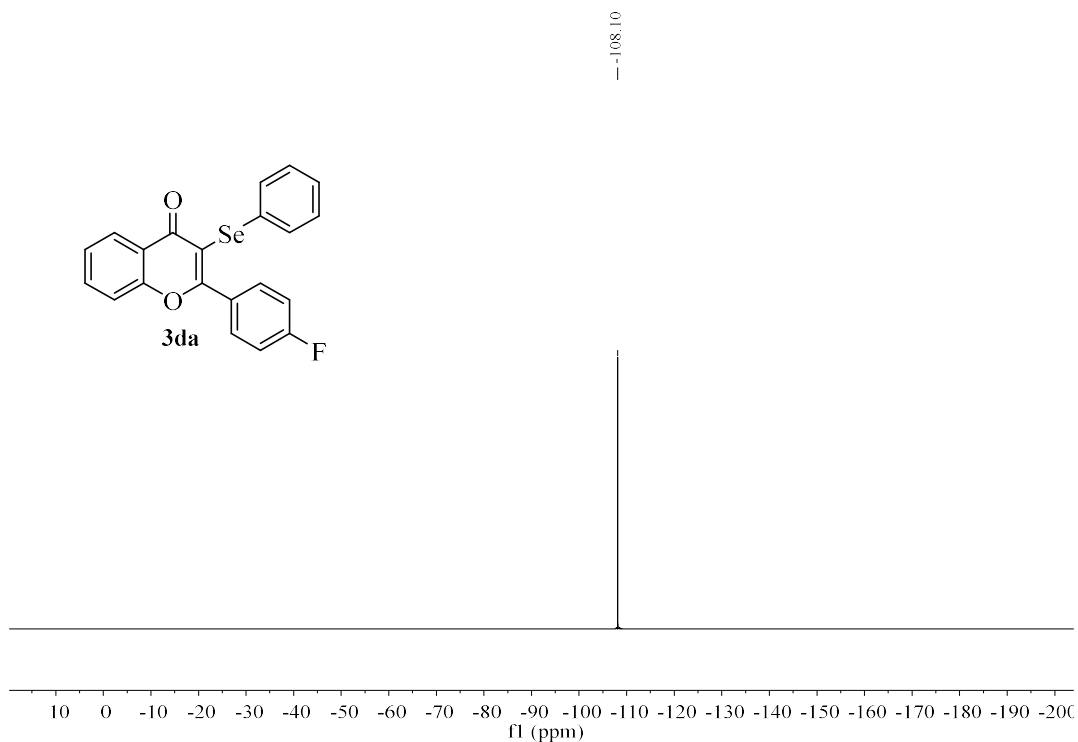

**Figure S70**  $^{19}\text{F}$  NMR (376.3 MHz) spectrum of **3da** in  $\text{CDCl}_3$

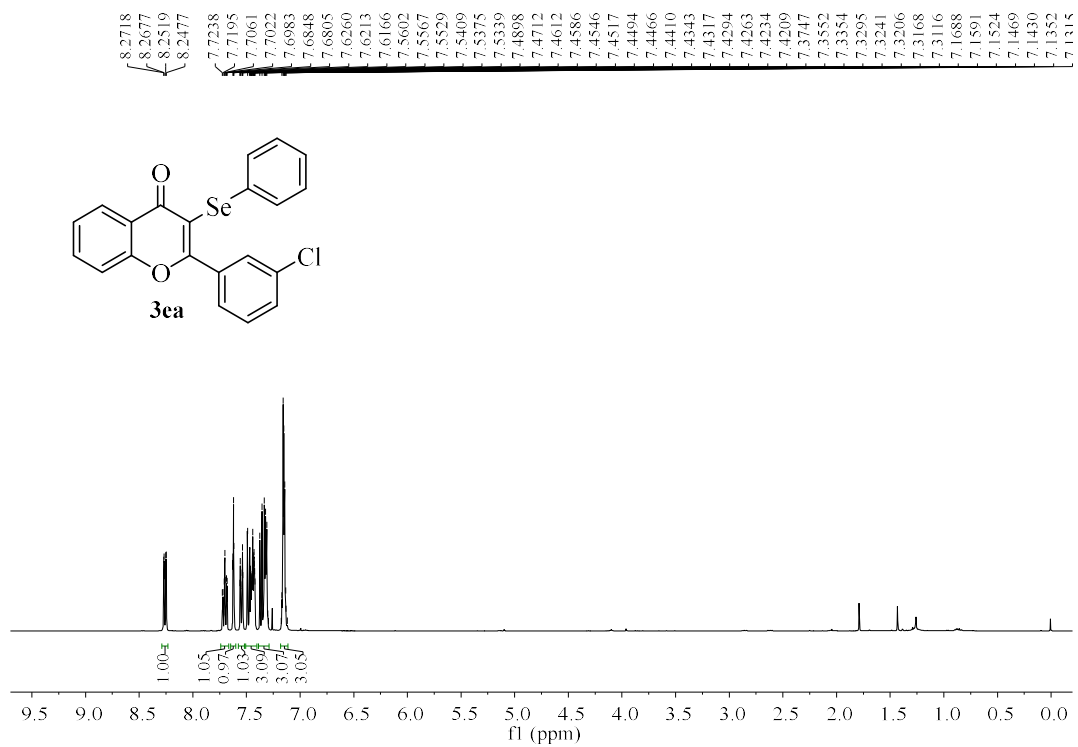

**Figure S71**  $^1\text{H}$  NMR (400 MHz) spectrum of **3ea** in  $\text{CDCl}_3$



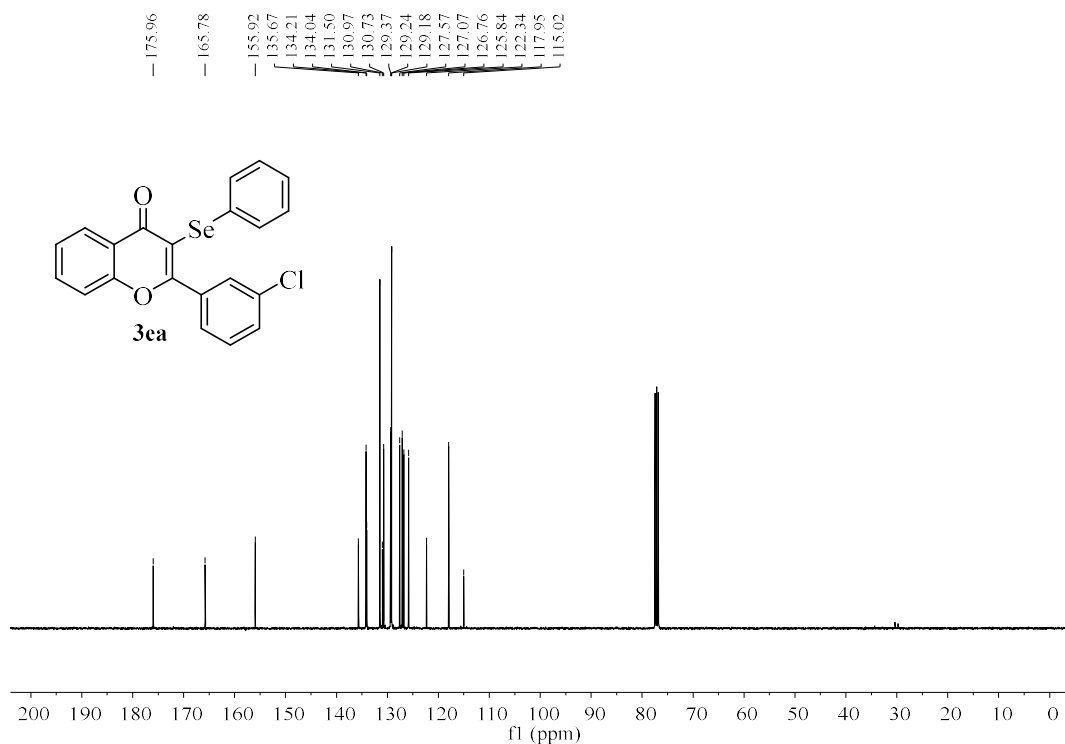

**Figure S72** <sup>13</sup>C NMR (100 MHz) spectrum of **3ea** in CDCl<sub>3</sub>

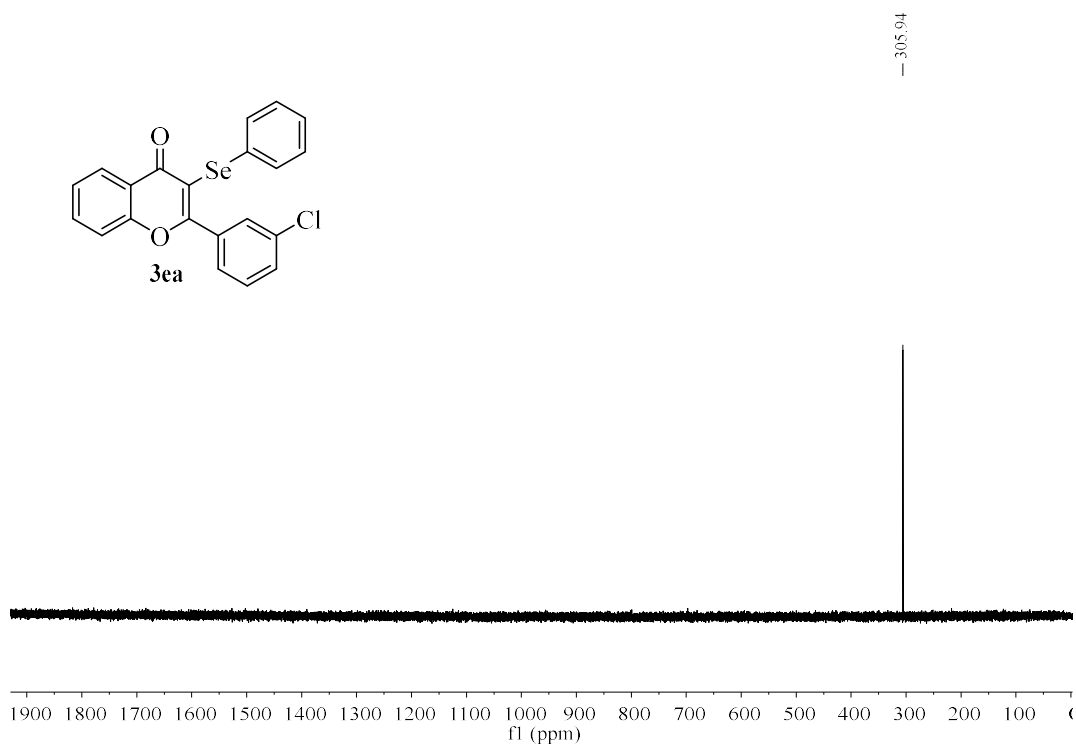

**Figure S73** <sup>77</sup>Se NMR (95.5 MHz) spectrum of **3ea** in CDCl<sub>3</sub>

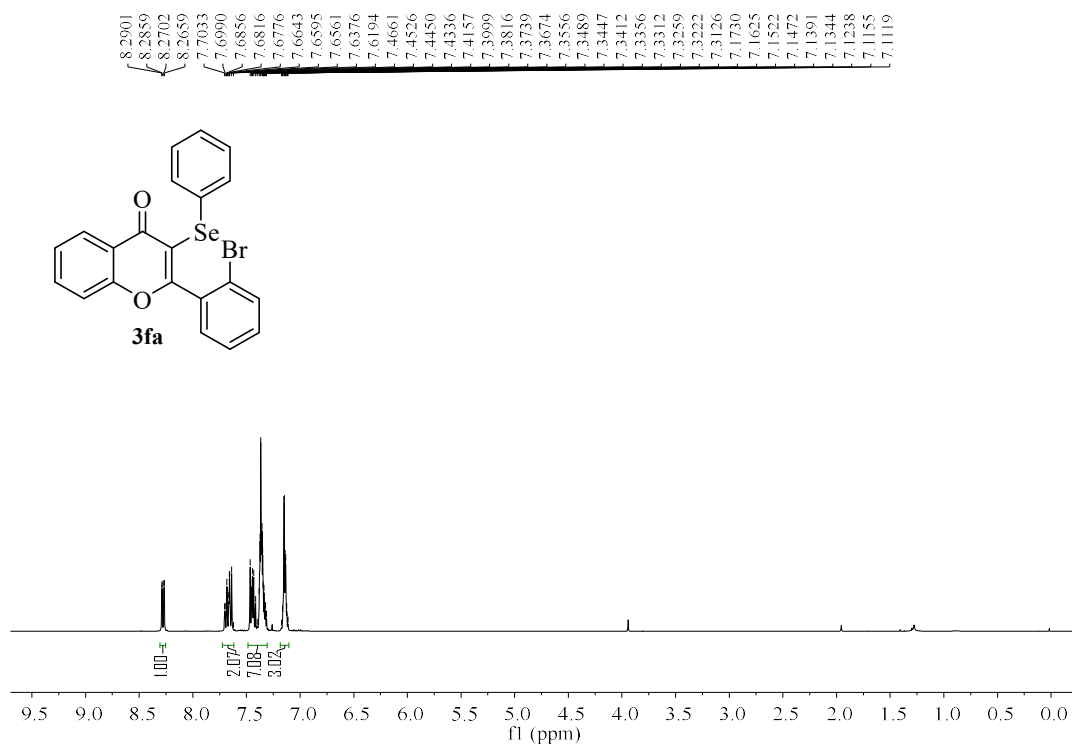

**Figure S74**  $^1\text{H}$  NMR (400 MHz) spectrum of **3fa** in  $\text{CDCl}_3$

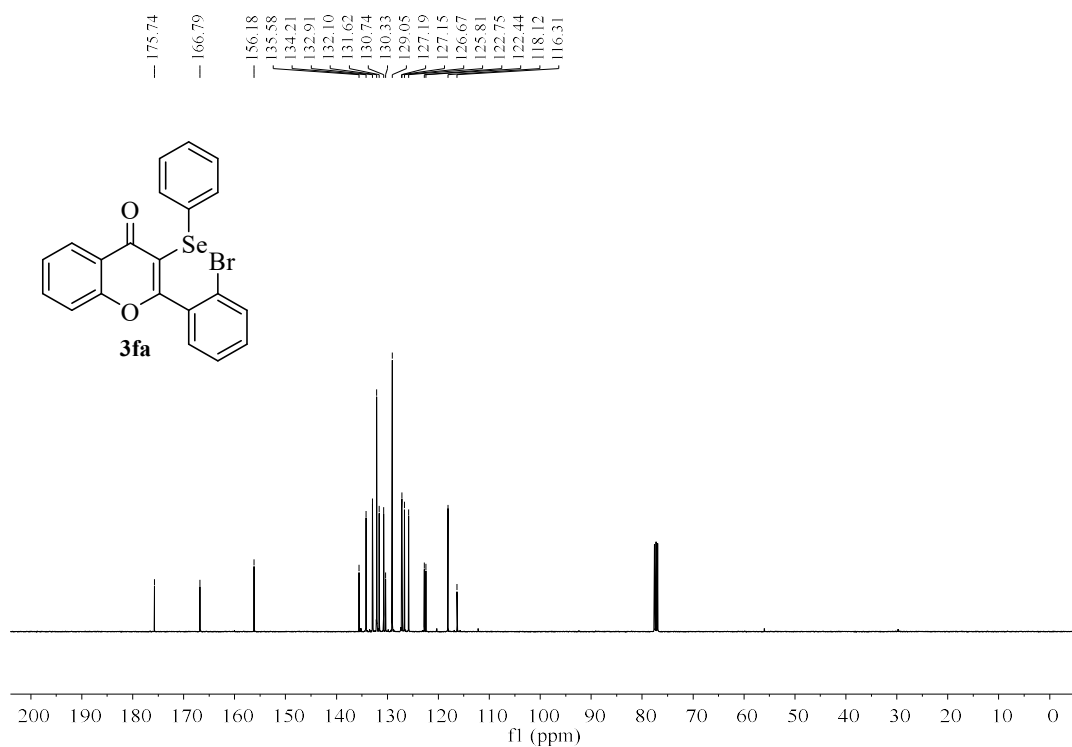

**Figure S75**  $^{13}\text{C}$  NMR (100 MHz) spectrum of **3fa** in  $\text{CDCl}_3$

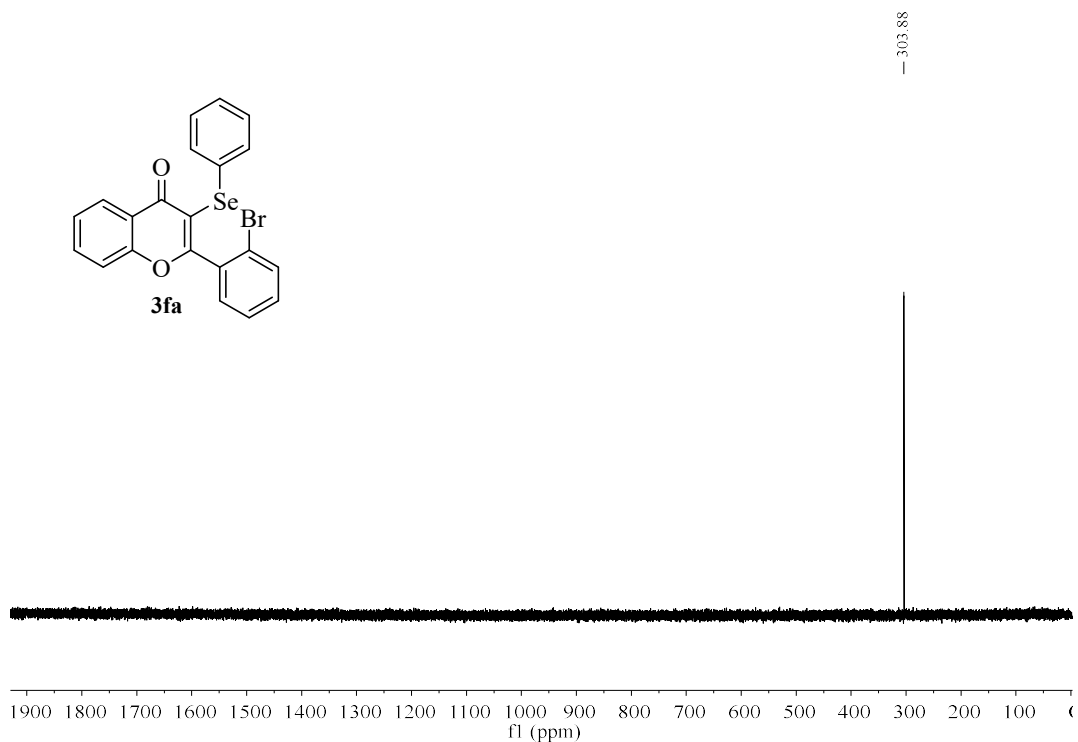

Figure S76 <sup>77</sup>Se NMR (95.5 MHz) spectrum of **3fa** in CDCl<sub>3</sub>

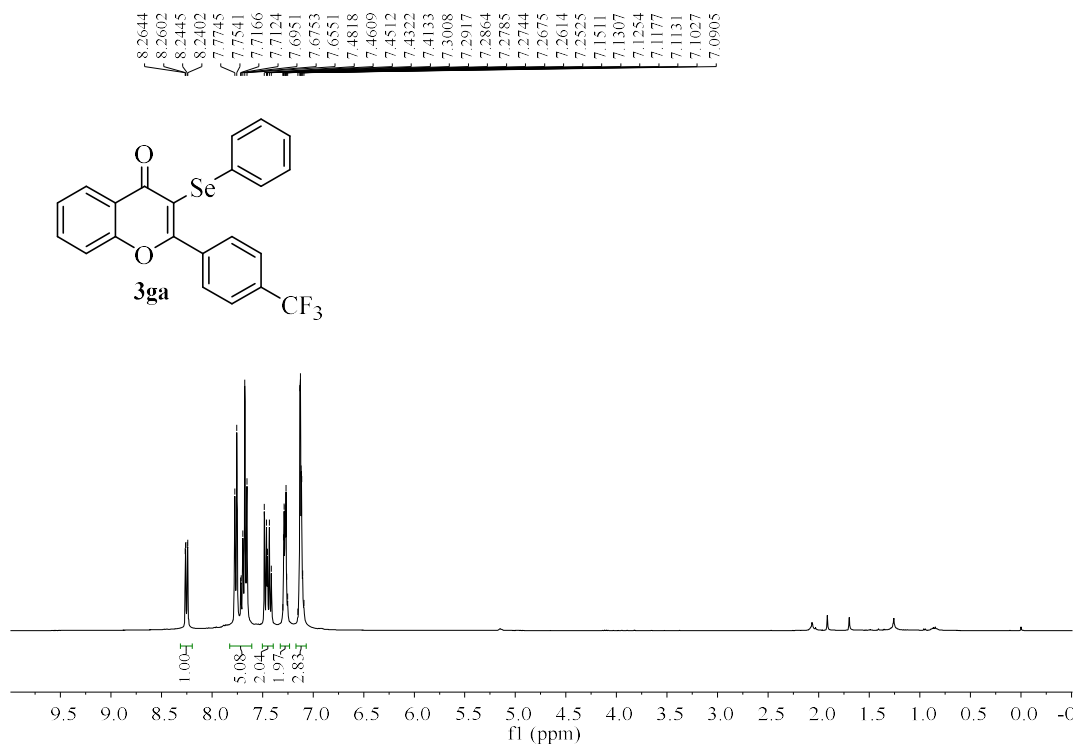

Figure S77 <sup>1</sup>H NMR (400 MHz) spectrum of **3ga** in CDCl<sub>3</sub>

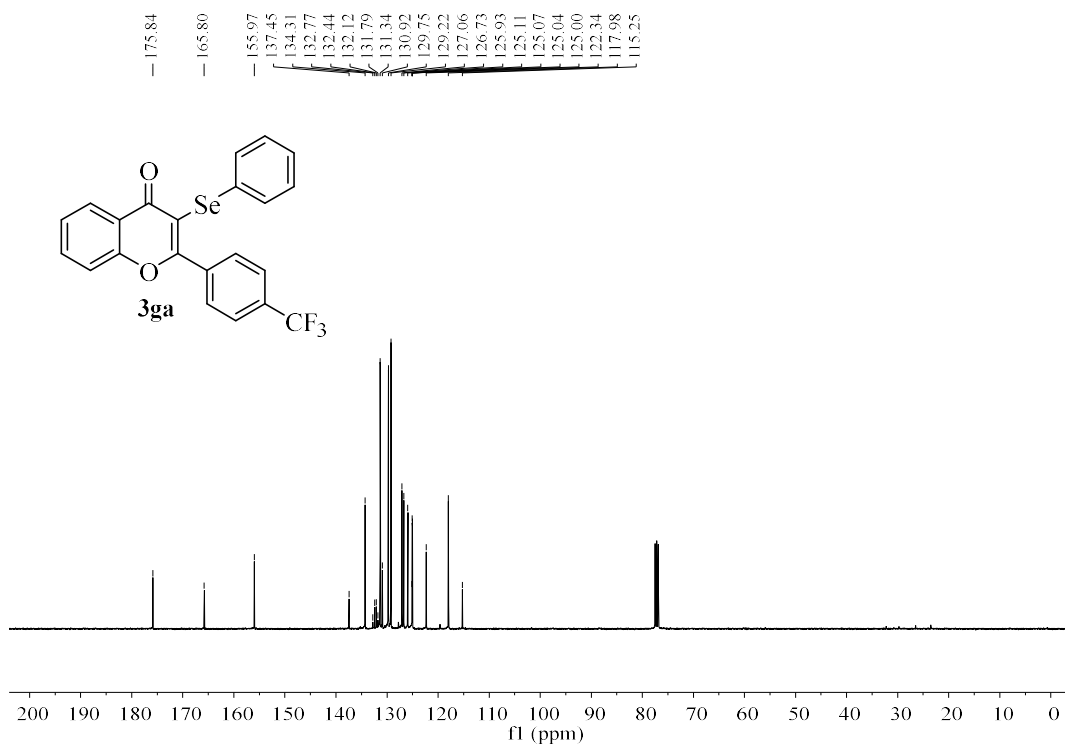

**Figure S78** <sup>13</sup>C NMR (100 MHz) spectrum of **3ga** in CDCl<sub>3</sub>

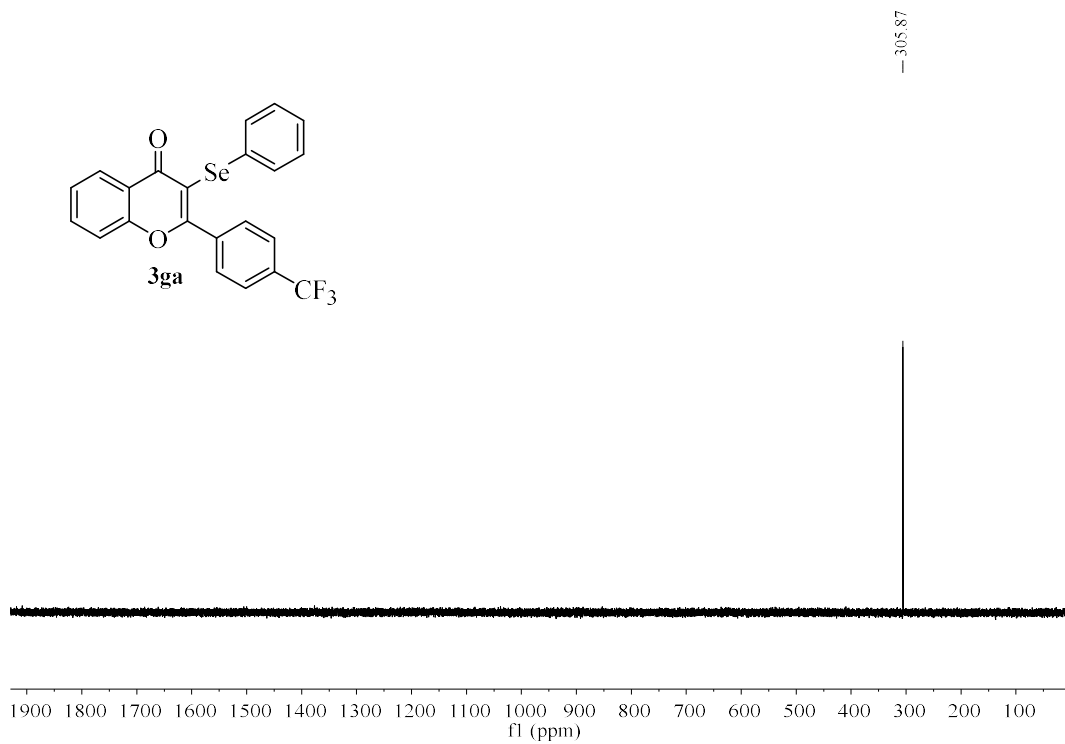

**Figure S79** <sup>77</sup>Se NMR (95.5 MHz) spectrum of **3ga** in CDCl<sub>3</sub>

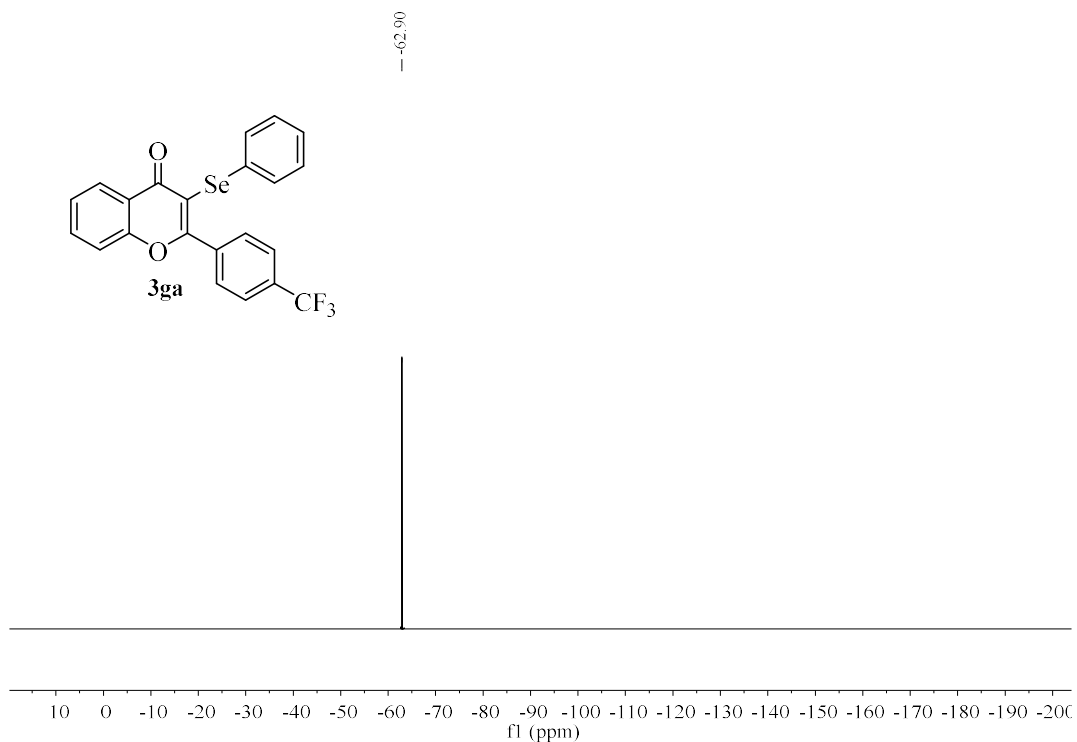

**Figure S80**  $^{19}\text{F}$  NMR (376.3 MHz) spectrum of **3ga** in  $\text{CDCl}_3$

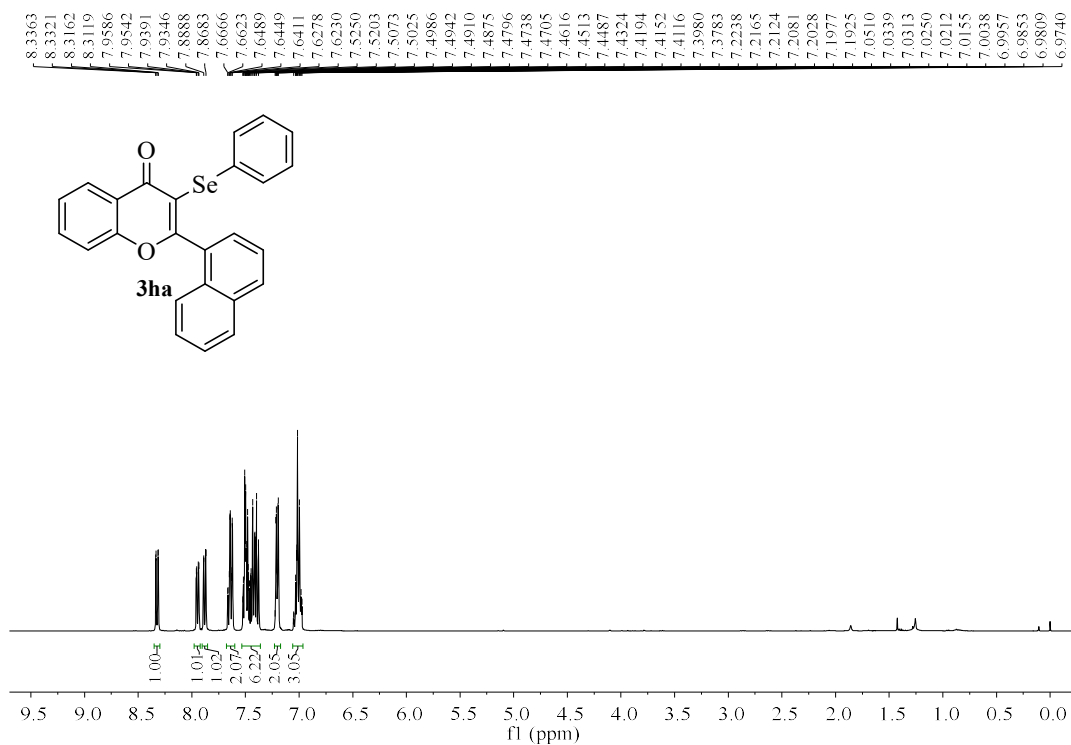

**Figure S81**  $^1\text{H}$  NMR (400 MHz) spectrum of **3ha** in  $\text{CDCl}_3$

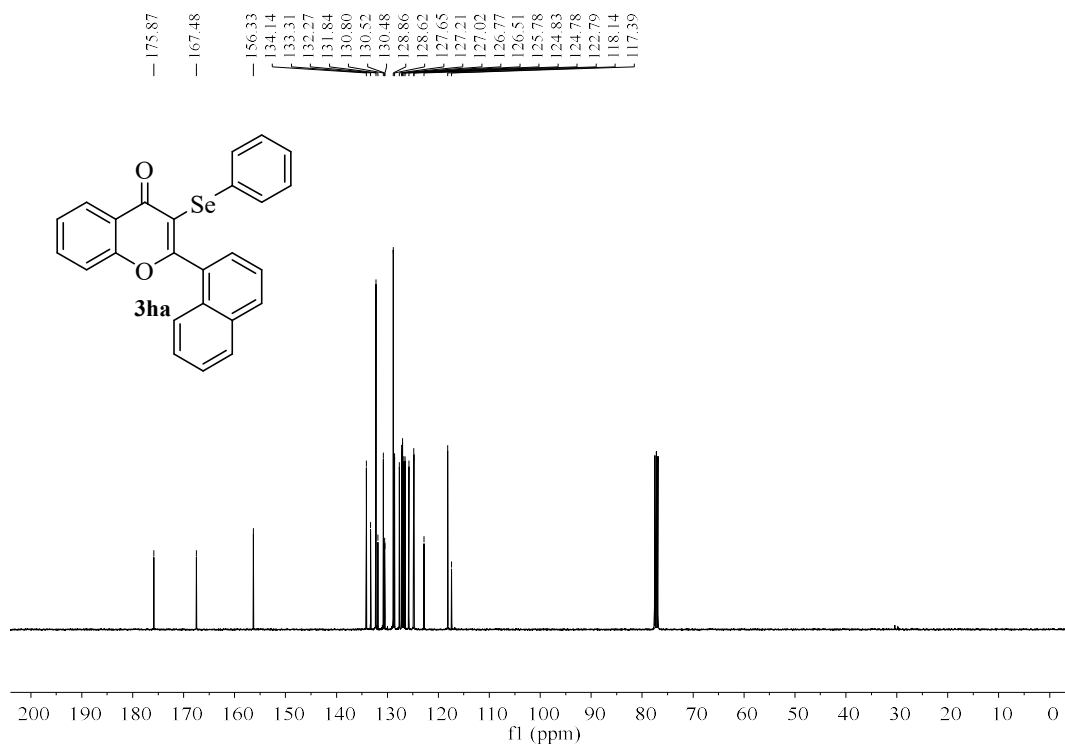

**Figure S82** <sup>13</sup>C NMR (100 MHz) spectrum of **3ha** in CDCl<sub>3</sub>

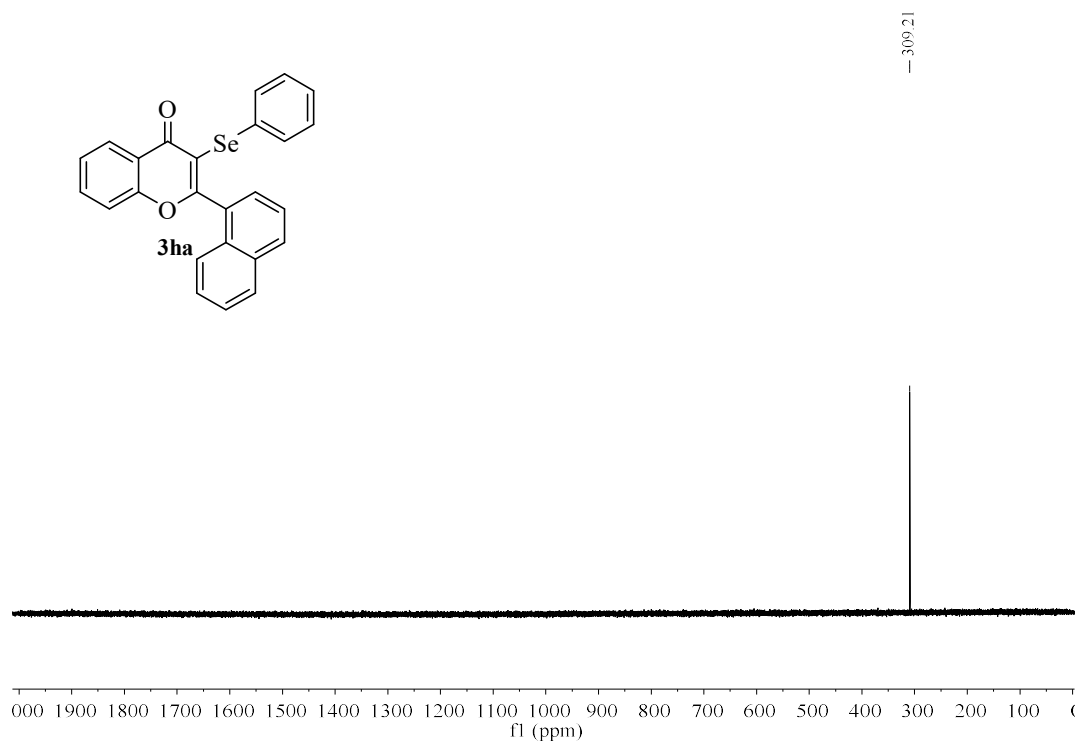

**Figure S83** <sup>77</sup>Se NMR (95.5 MHz) spectrum of **3ha** in CDCl<sub>3</sub>

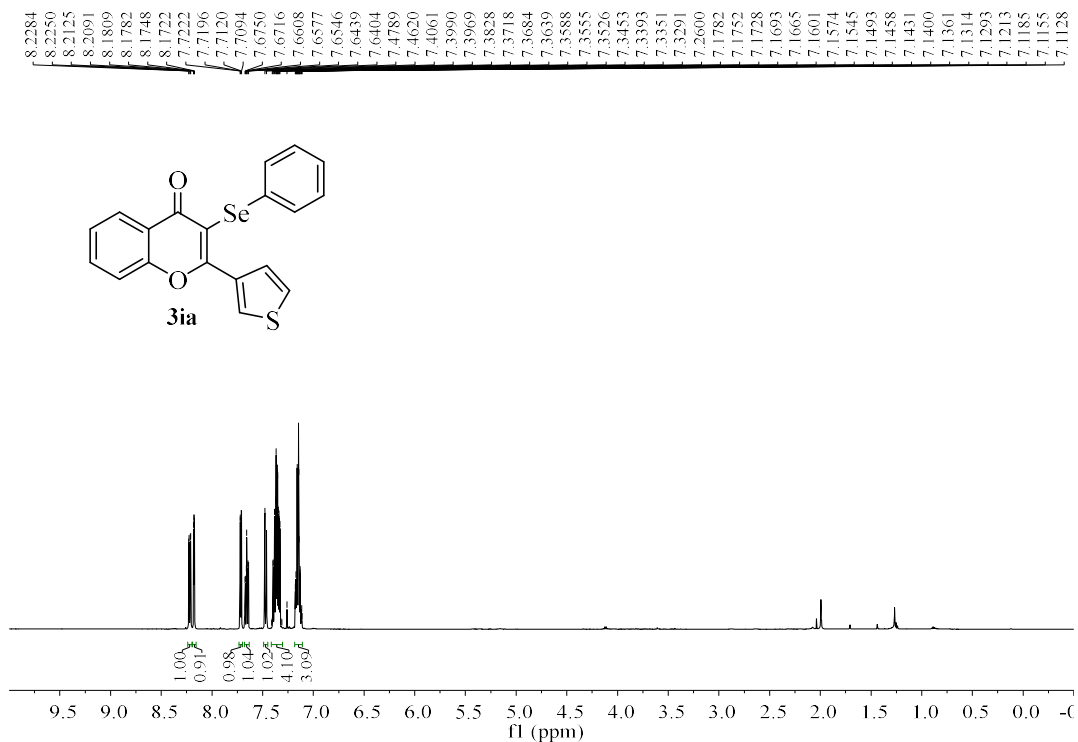

**Figure S84**  $^1\text{H}$  NMR (500 MHz) spectrum of **3ia** in  $\text{CDCl}_3$

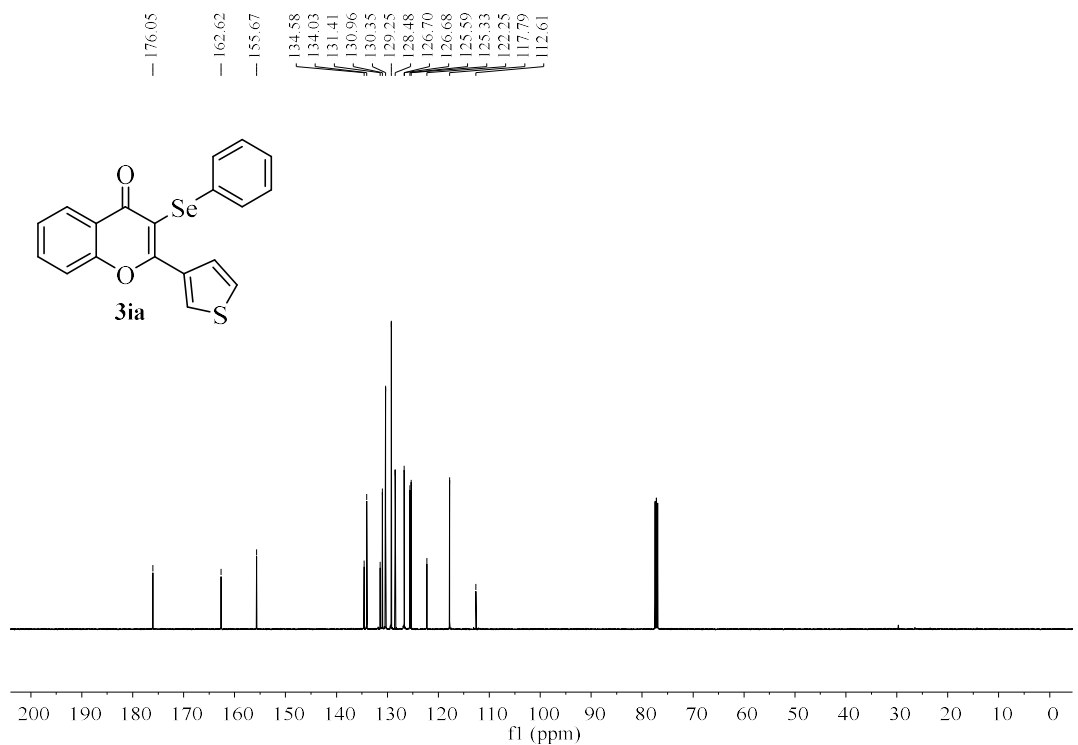

**Figure S85**  $^{13}\text{C}$  NMR (125 MHz) spectrum of **3ia** in  $\text{CDCl}_3$

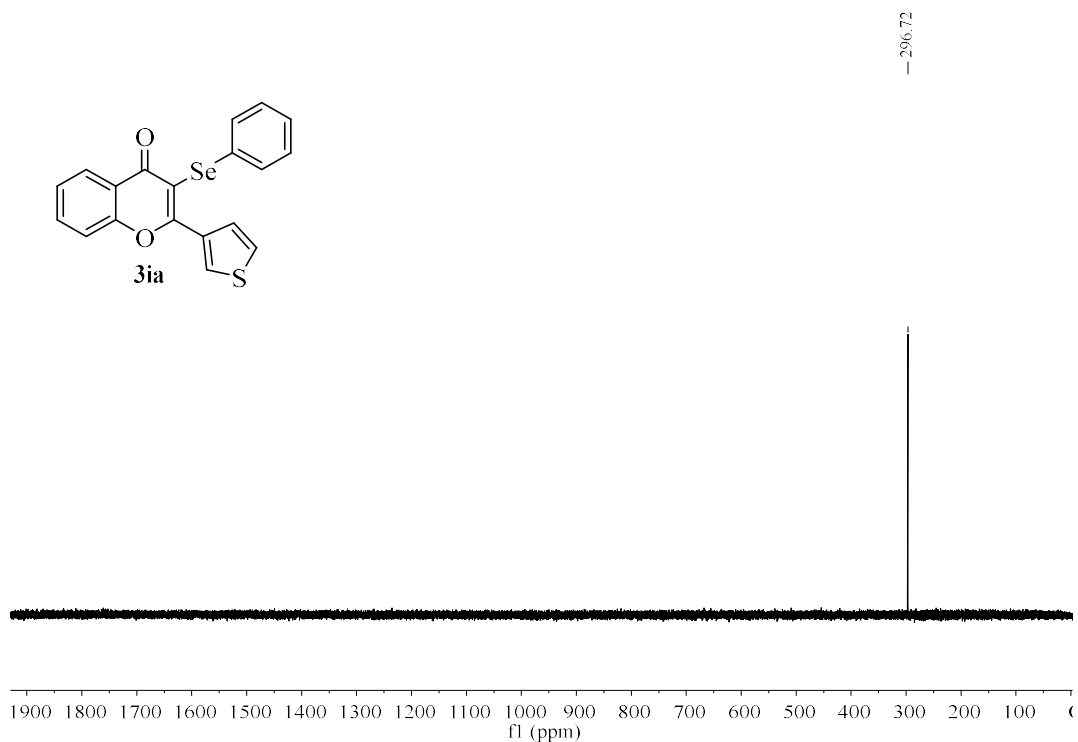

**Figure S86** <sup>77</sup>Se NMR (95.5 MHz) spectrum of **3ia** in CDCl<sub>3</sub>

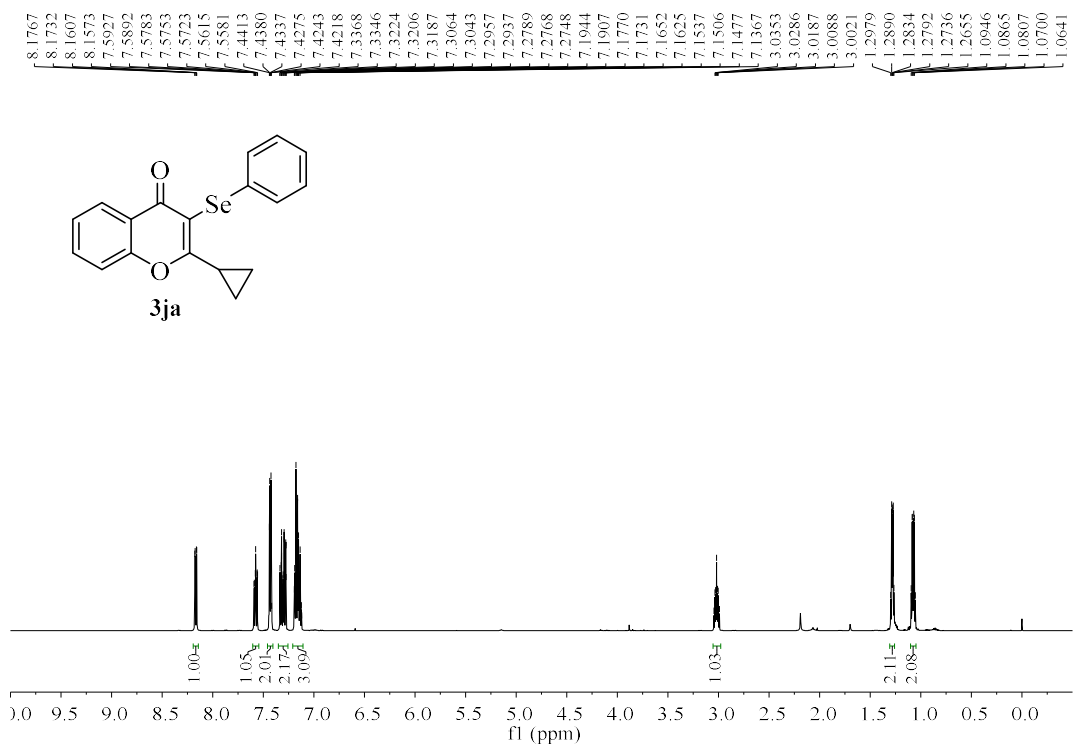

**Figure S87** <sup>1</sup>H NMR (500 MHz) spectrum of **3ja** in CDCl<sub>3</sub>



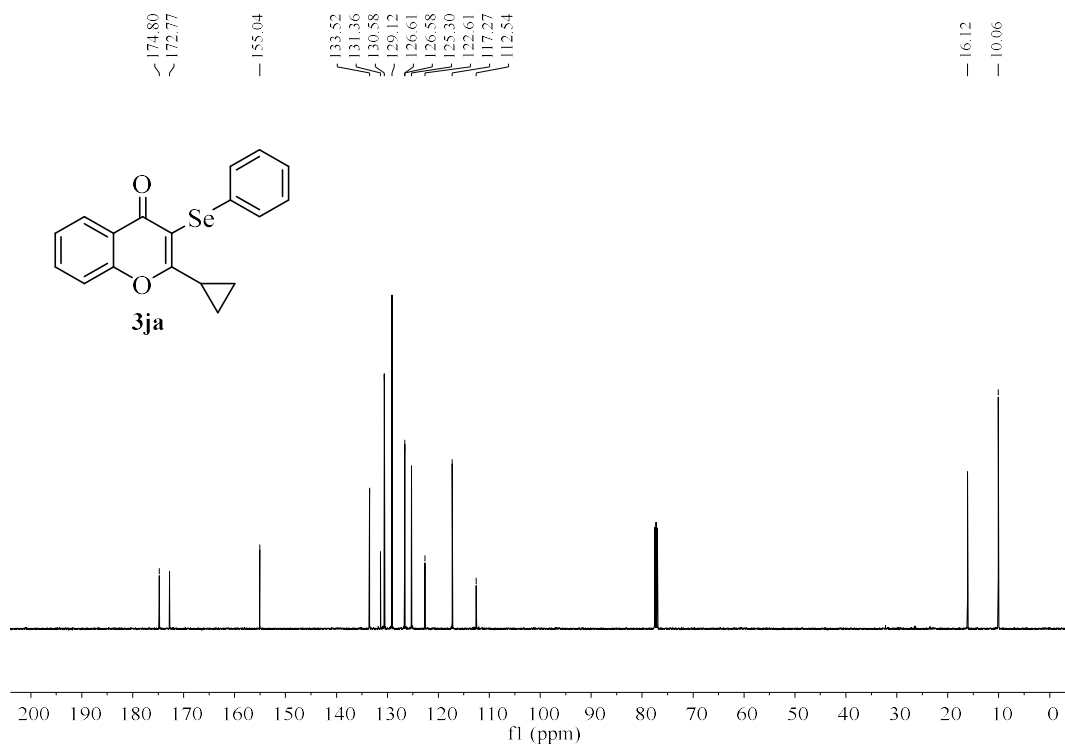

**Figure S88** <sup>13</sup>C NMR (125 MHz) spectrum of **3ja** in CDCl<sub>3</sub>

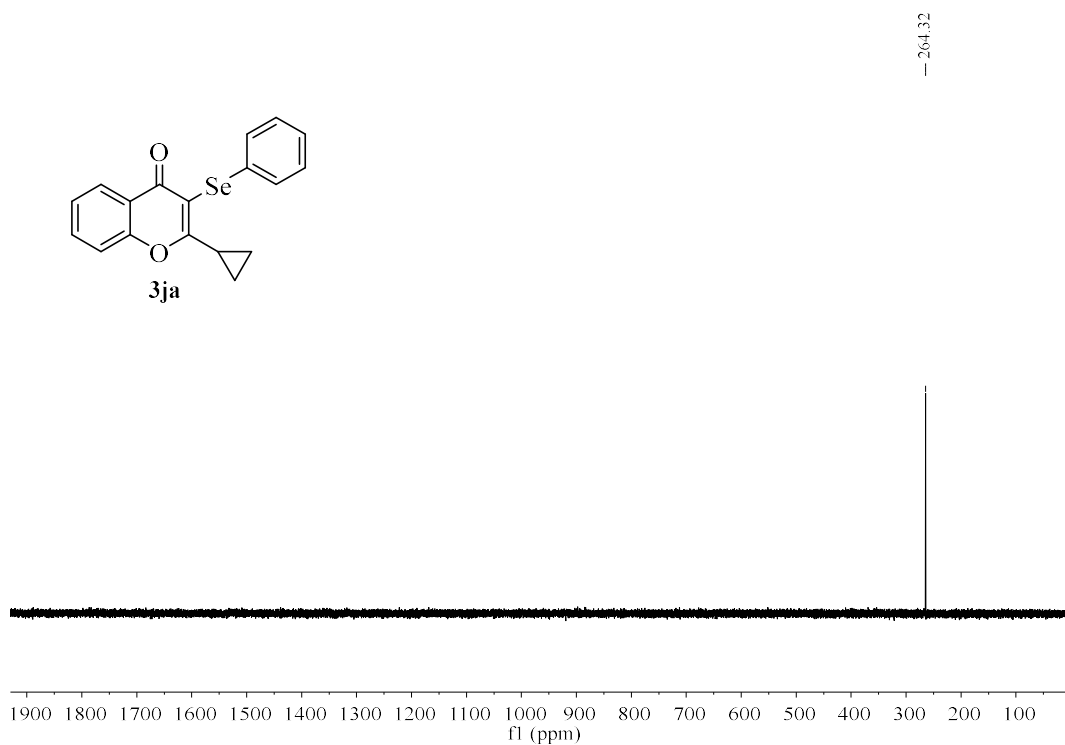

**Figure S89** <sup>77</sup>Se NMR (95.5 MHz) spectrum of **3ja** in CDCl<sub>3</sub>

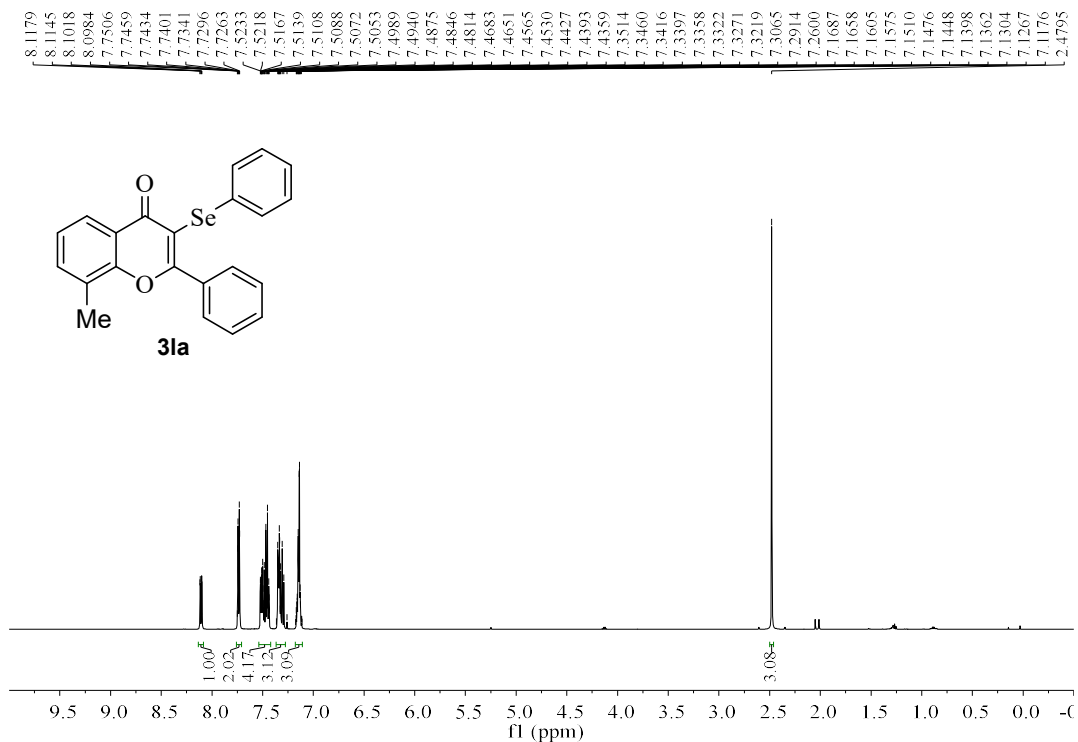

Figure S90 <sup>1</sup>H NMR (500 MHz) spectrum of **3la** in CDCl<sub>3</sub>

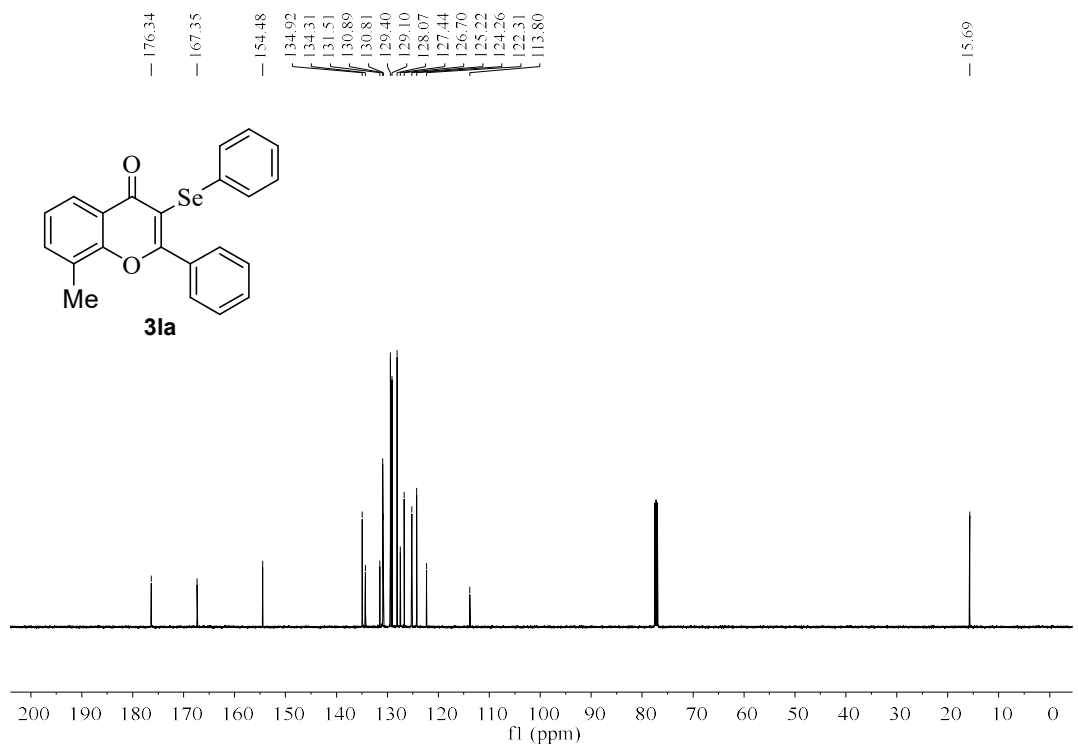

Figure S91 <sup>13</sup>C NMR (125 MHz) spectrum of **3la** in CDCl<sub>3</sub>

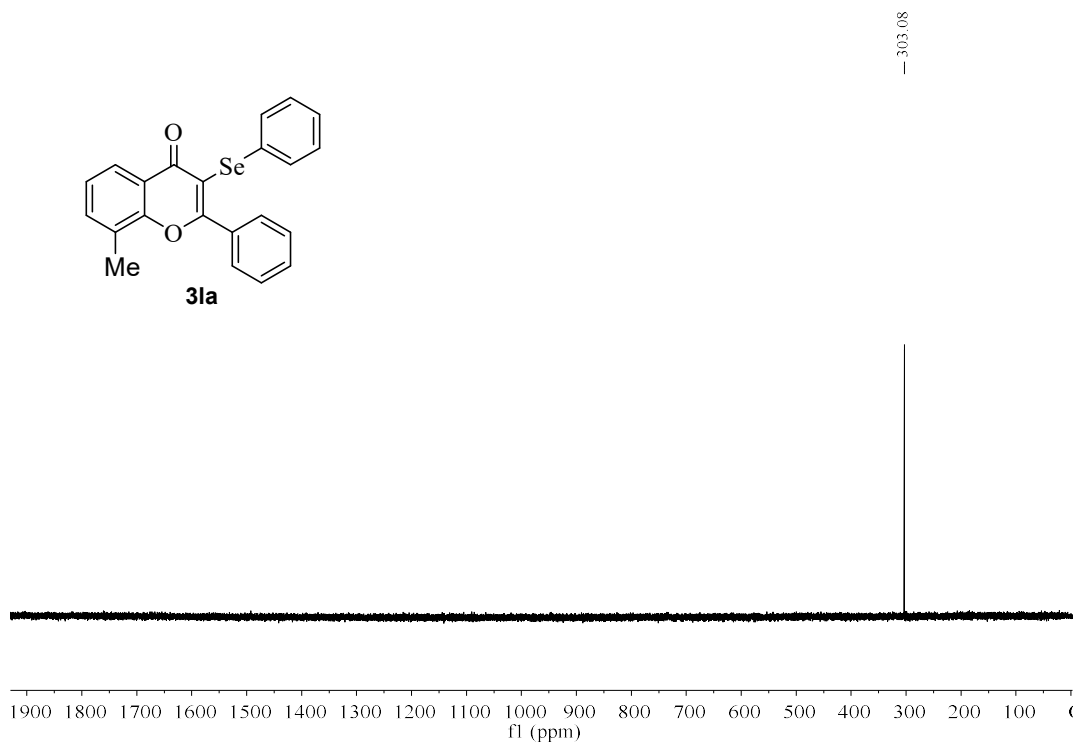

**Figure S92** <sup>77</sup>Se NMR (95.5 MHz) spectrum of **3la** in CDCl<sub>3</sub>

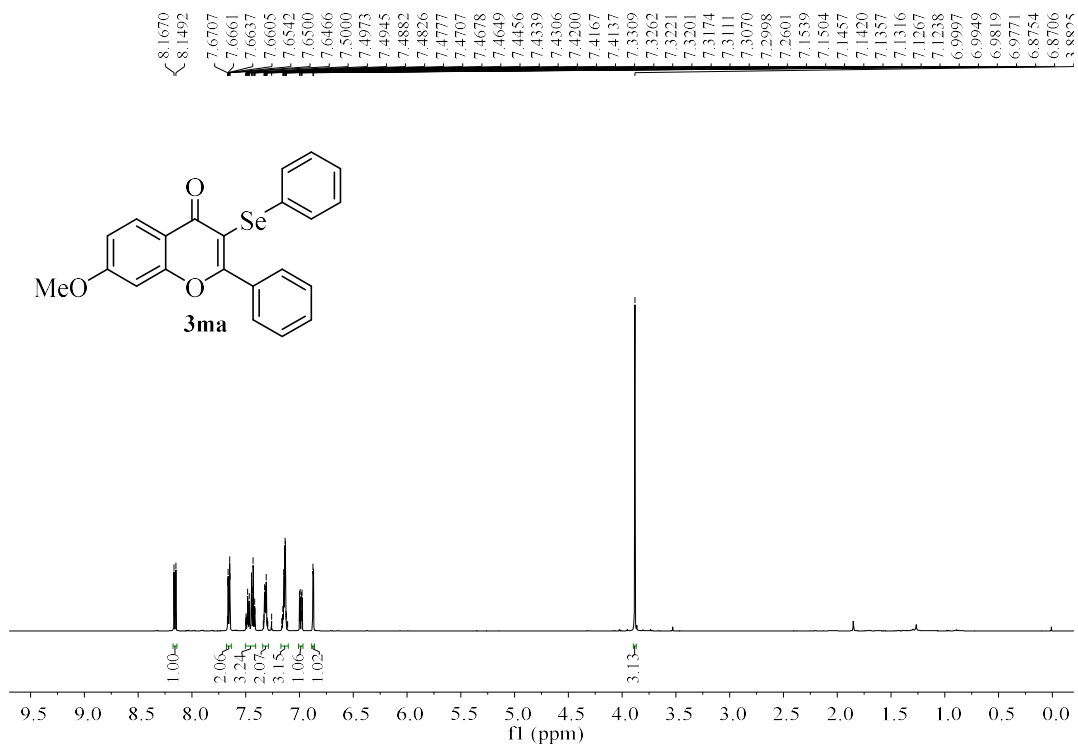

**Figure S93** <sup>1</sup>H NMR (500 MHz) spectrum of **3ma** in CDCl<sub>3</sub>

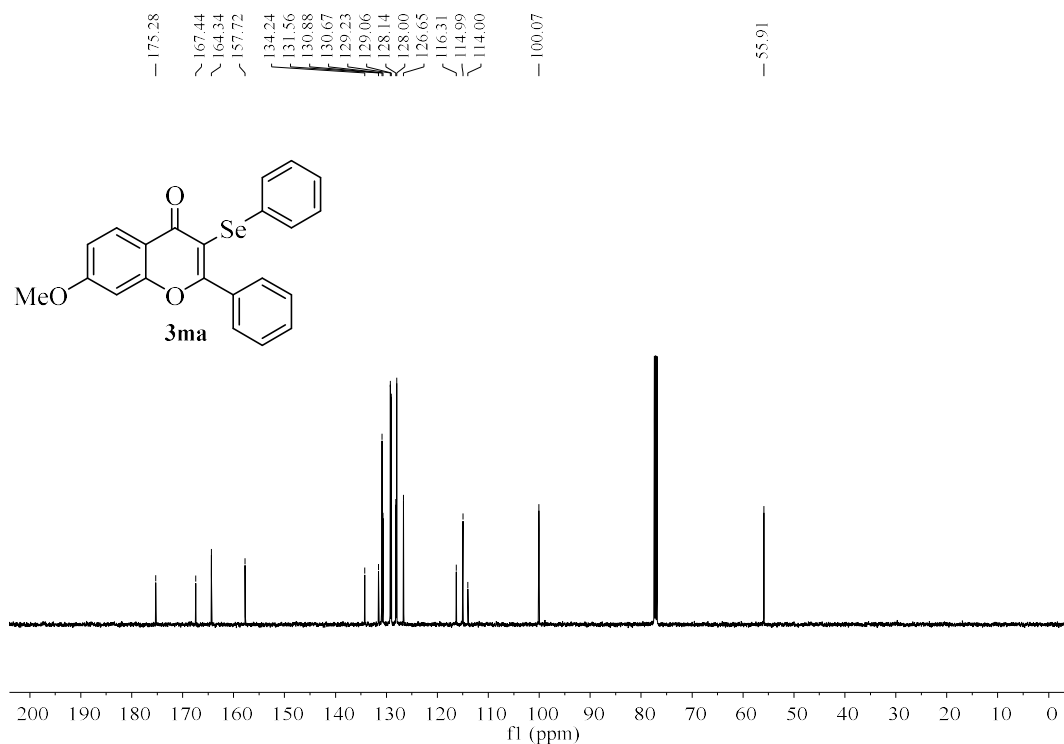

**Figure S94**  $^{13}\text{C}$  NMR (125 MHz) spectrum of **3ma** in  $\text{CDCl}_3$

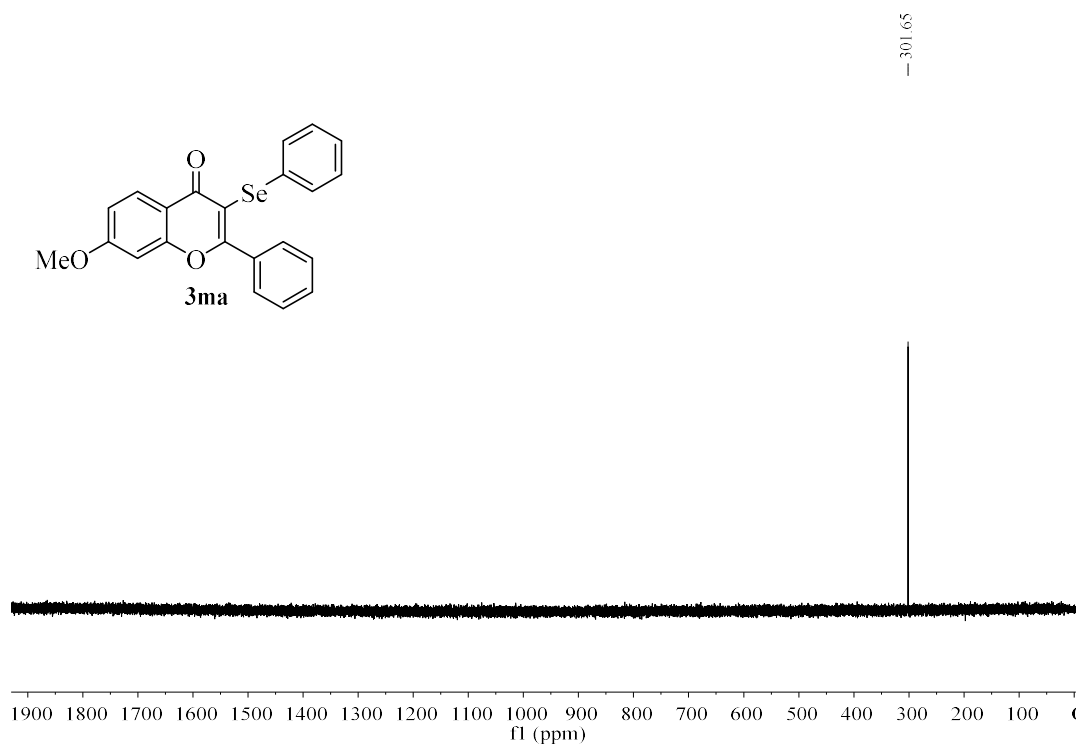

**Figure S95**  $^{77}\text{Se}$  NMR (95.5 MHz) spectrum of **3ma** in  $\text{CDCl}_3$

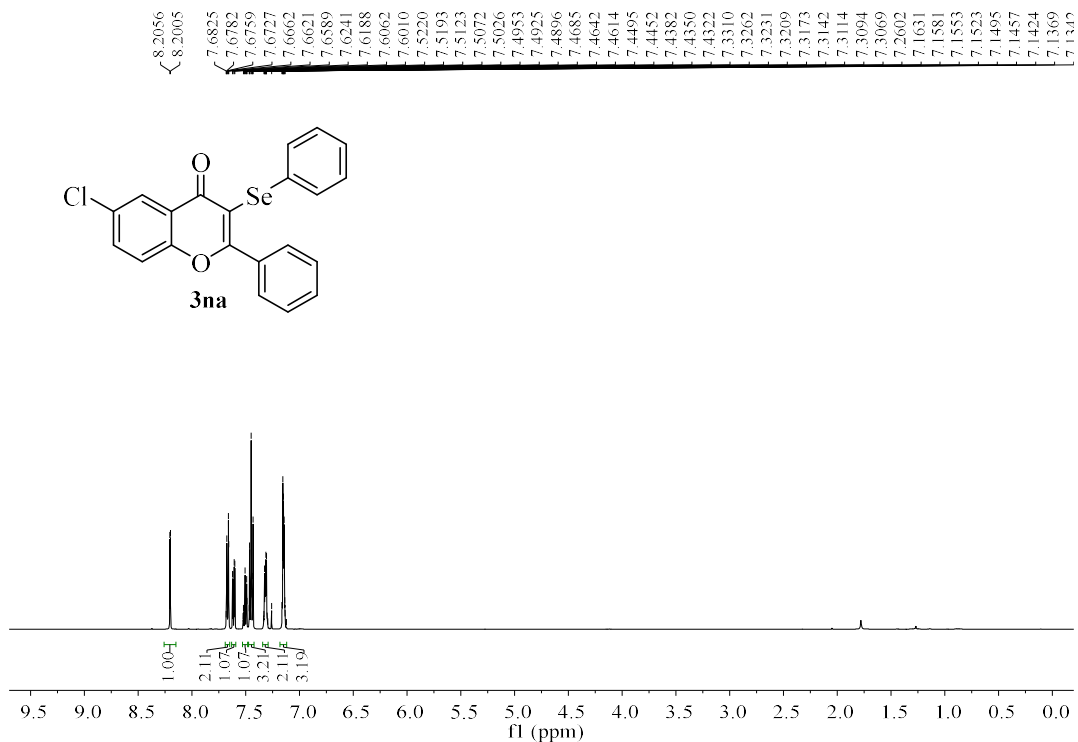

Figure S96  $^1\text{H}$  NMR (500 MHz) spectrum of **3na** in  $\text{CDCl}_3$

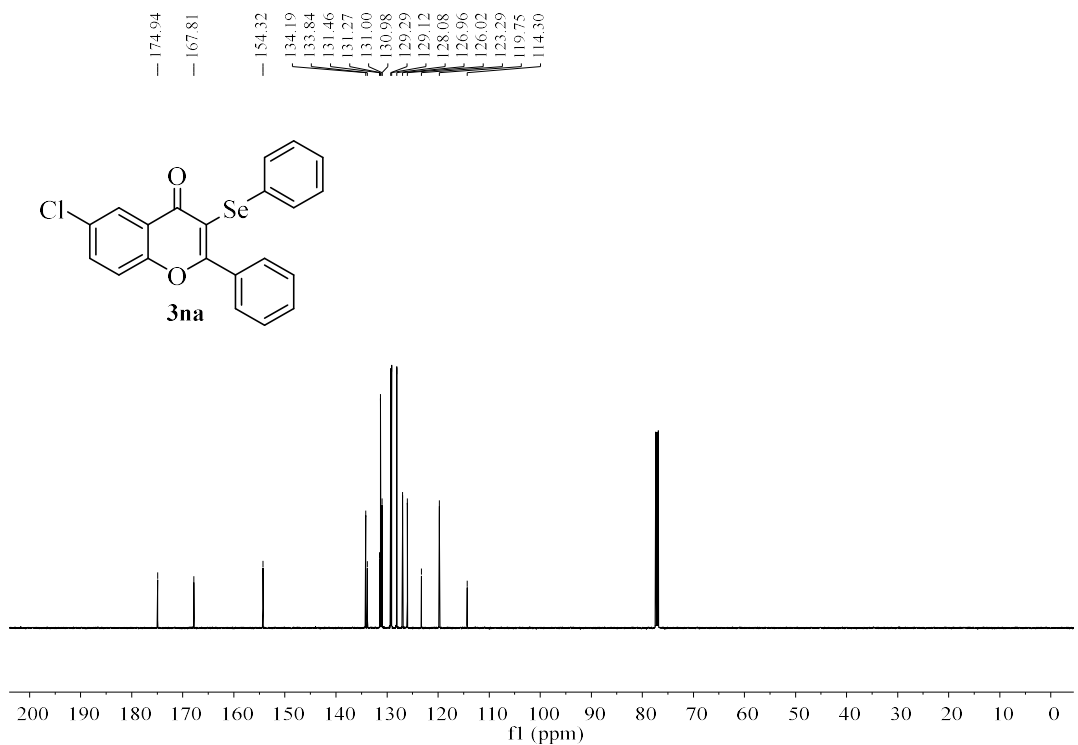

Figure S97  $^{13}\text{C}$  NMR (125 MHz) spectrum of **3na** in  $\text{CDCl}_3$

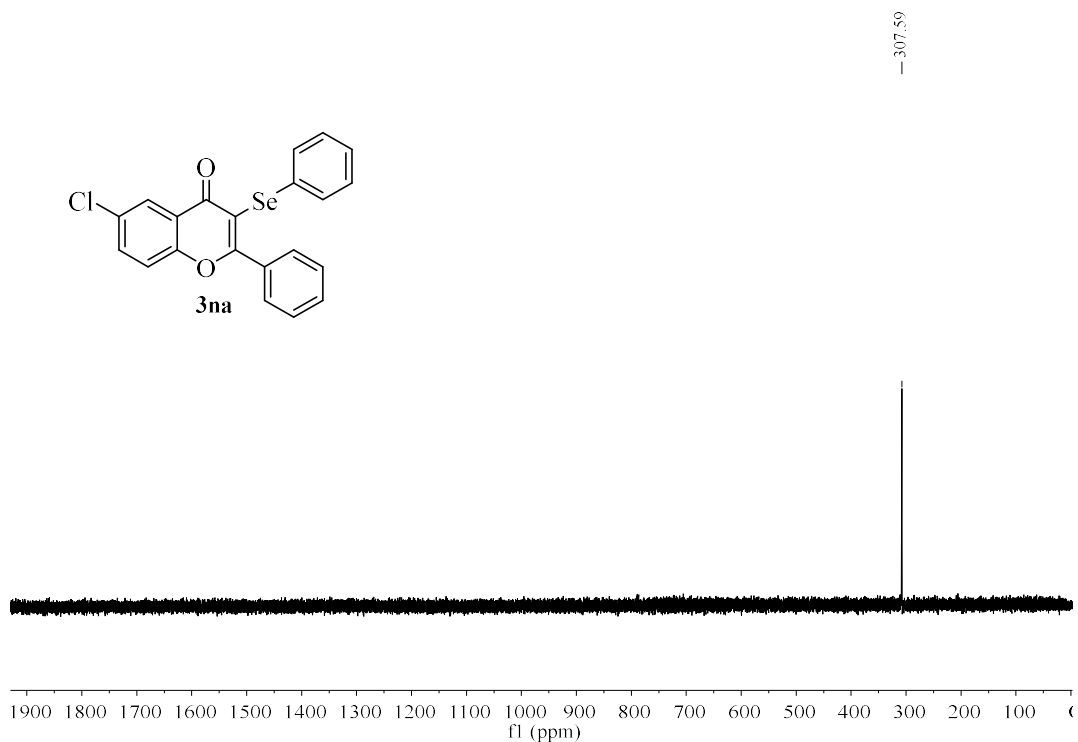

Figure S98 <sup>77</sup>Se NMR (95.5 MHz) spectrum of **3na** in CDCl<sub>3</sub>

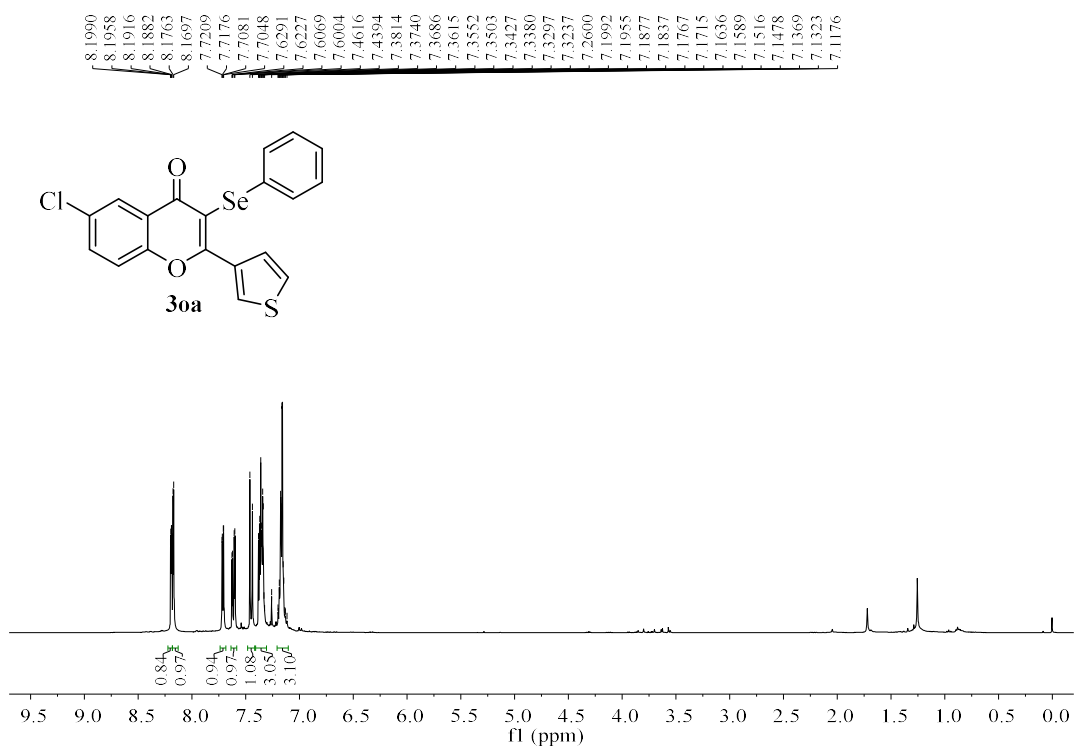

Figure S99 <sup>1</sup>H NMR (400 MHz) spectrum of **3oa** in CDCl<sub>3</sub>

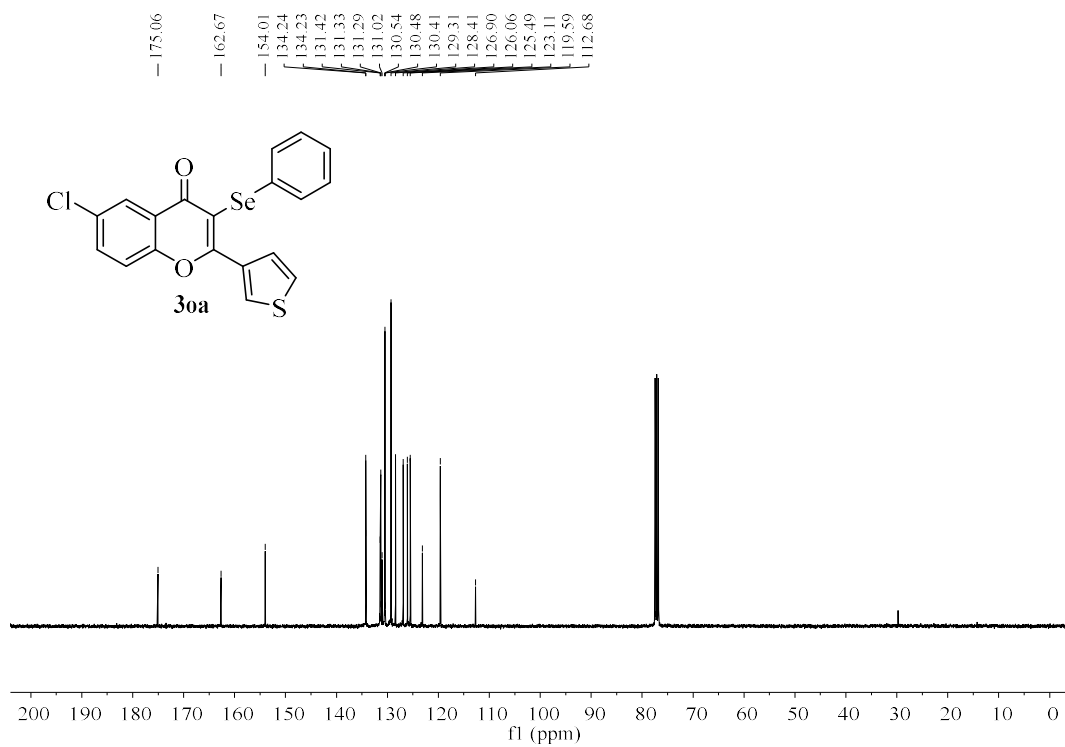

**Figure S100**  $^{13}\text{C}$  NMR (100 MHz) spectrum of **30a** in  $\text{CDCl}_3$

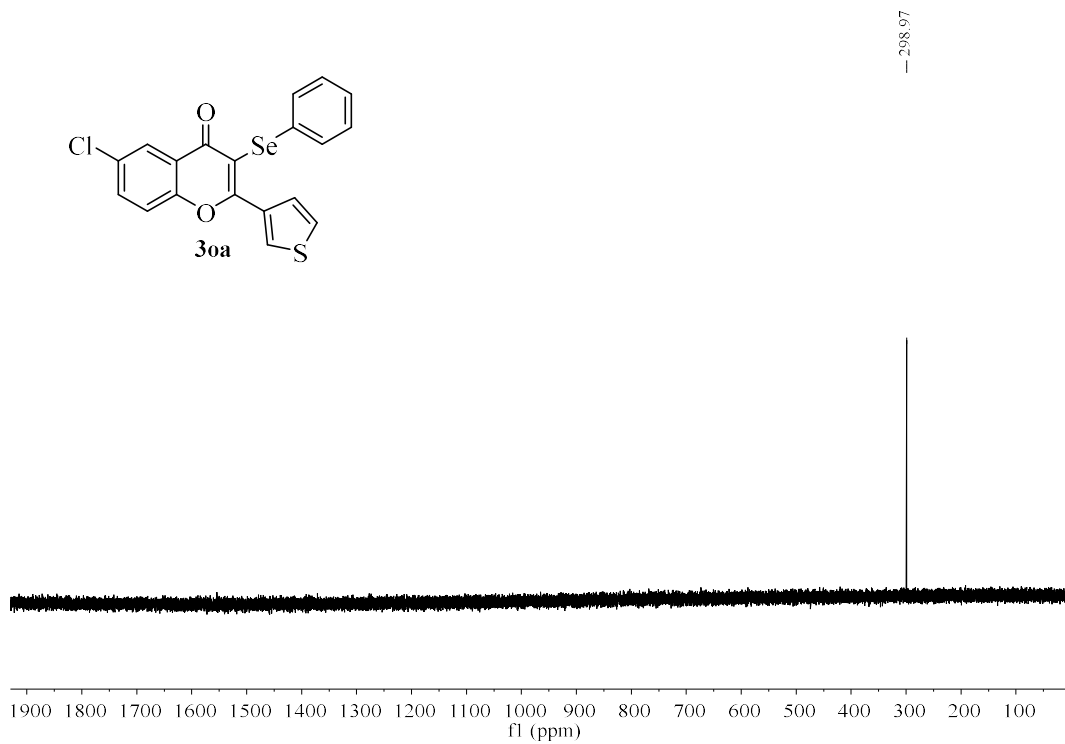

**Figure S101**  $^{77}\text{Se}$  NMR (95.5 MHz) spectrum of **30a** in  $\text{CDCl}_3$

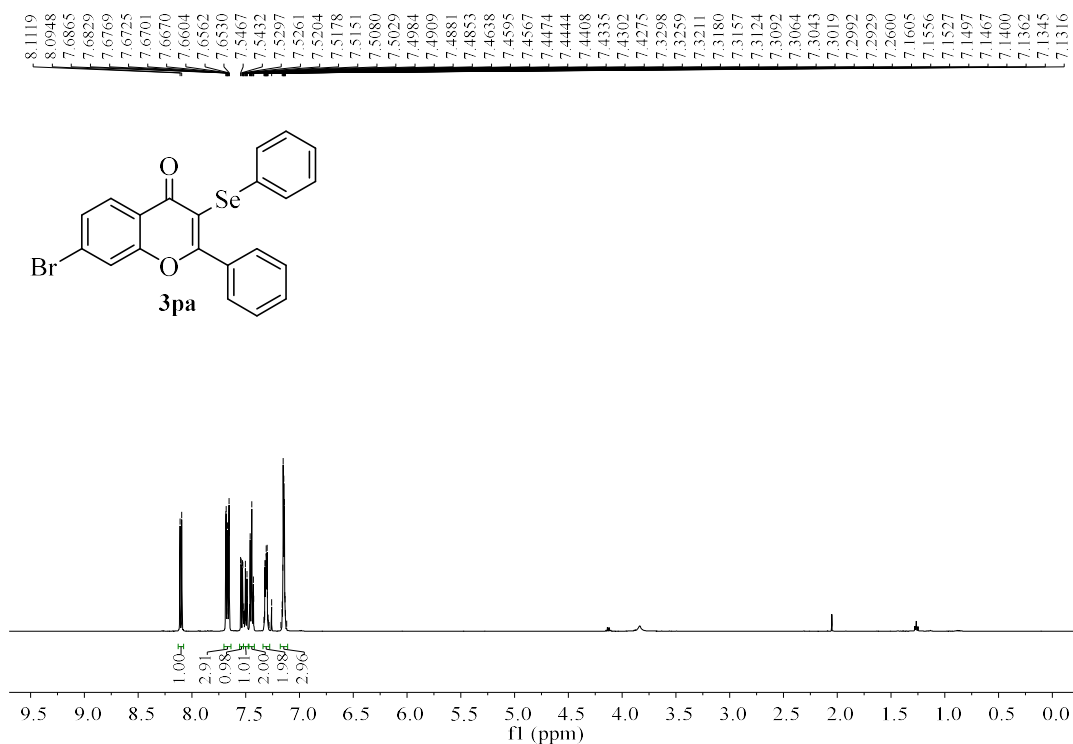

**Figure S102**  $^1\text{H}$  NMR (500 MHz) spectrum of **3pa** in  $\text{CDCl}_3$

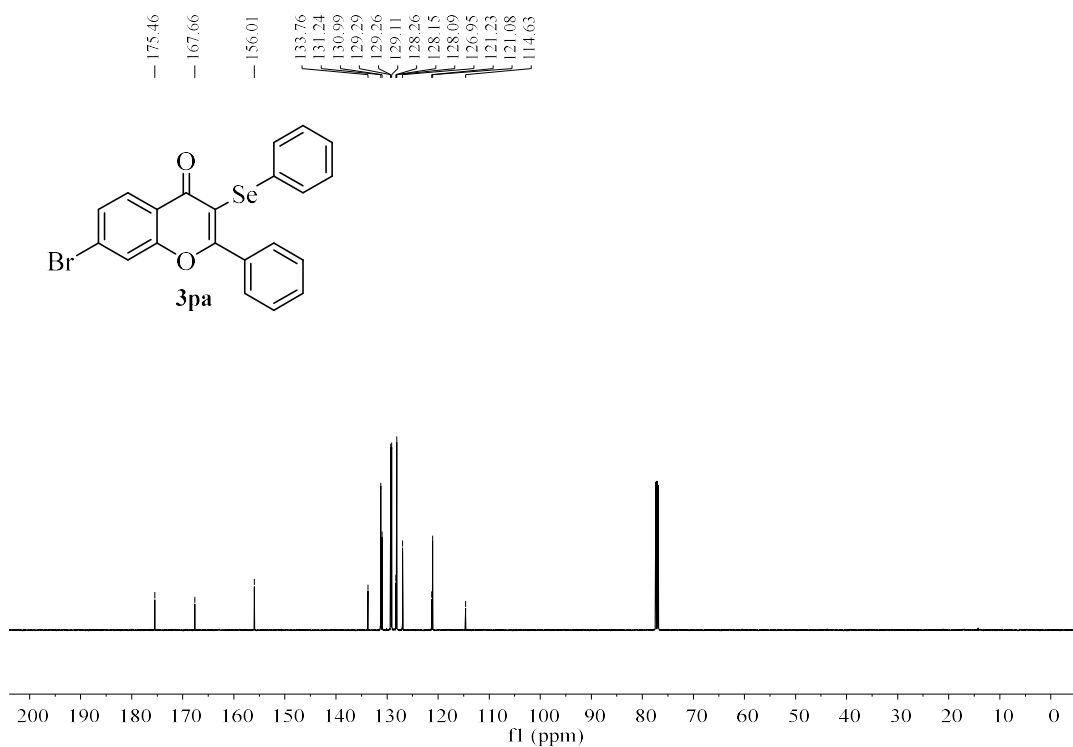

**Figure S103**  $^{13}\text{C}$  NMR (125 MHz) spectrum of **3pa** in  $\text{CDCl}_3$



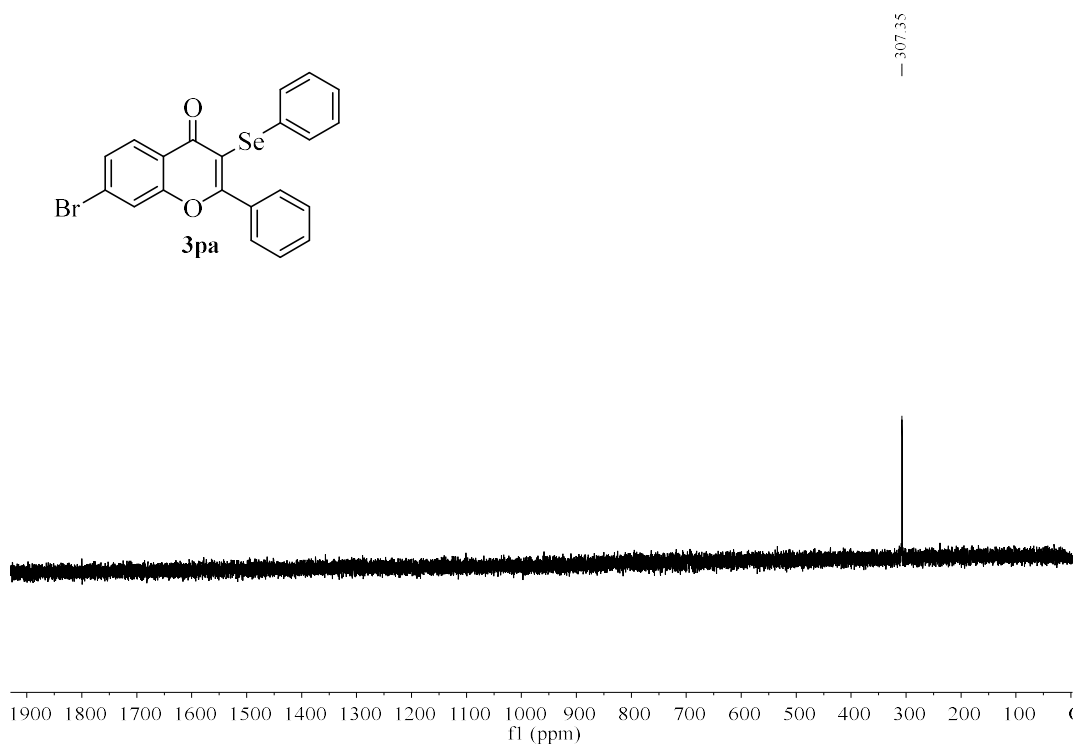

**Figure S104**  $^{77}\text{Se}$  NMR (95.5 MHz) spectrum of **3pa** in  $\text{CDCl}_3$

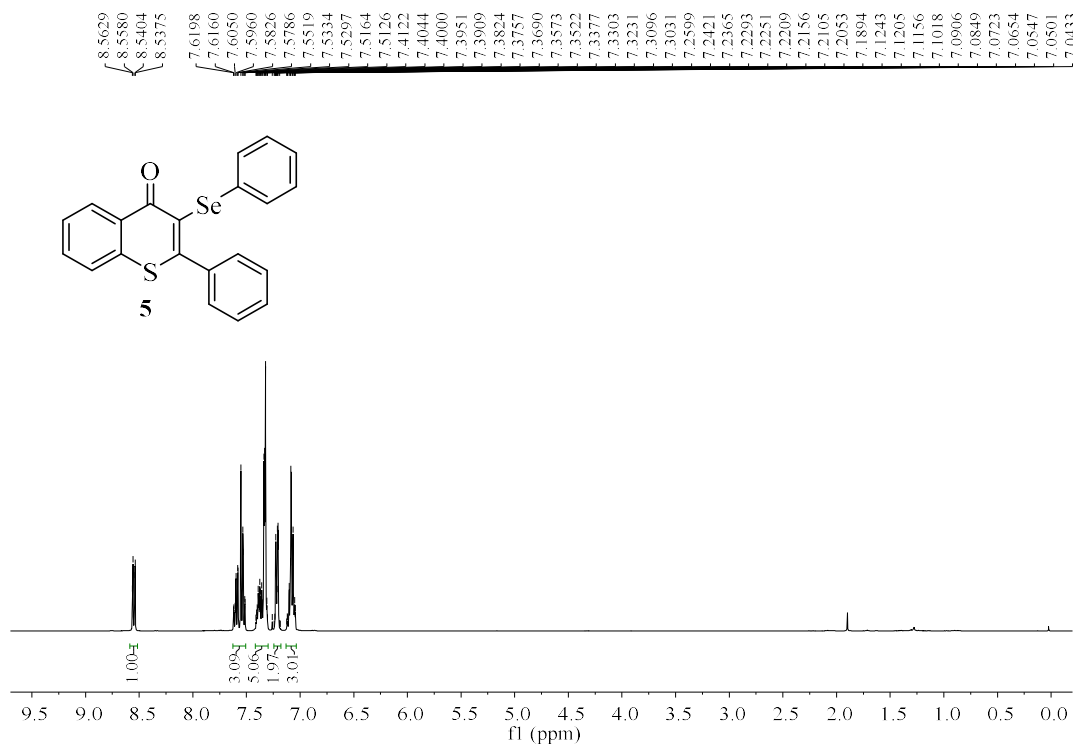

**Figure S105**  $^1\text{H}$  NMR (400 MHz) spectrum of **5** in  $\text{CDCl}_3$

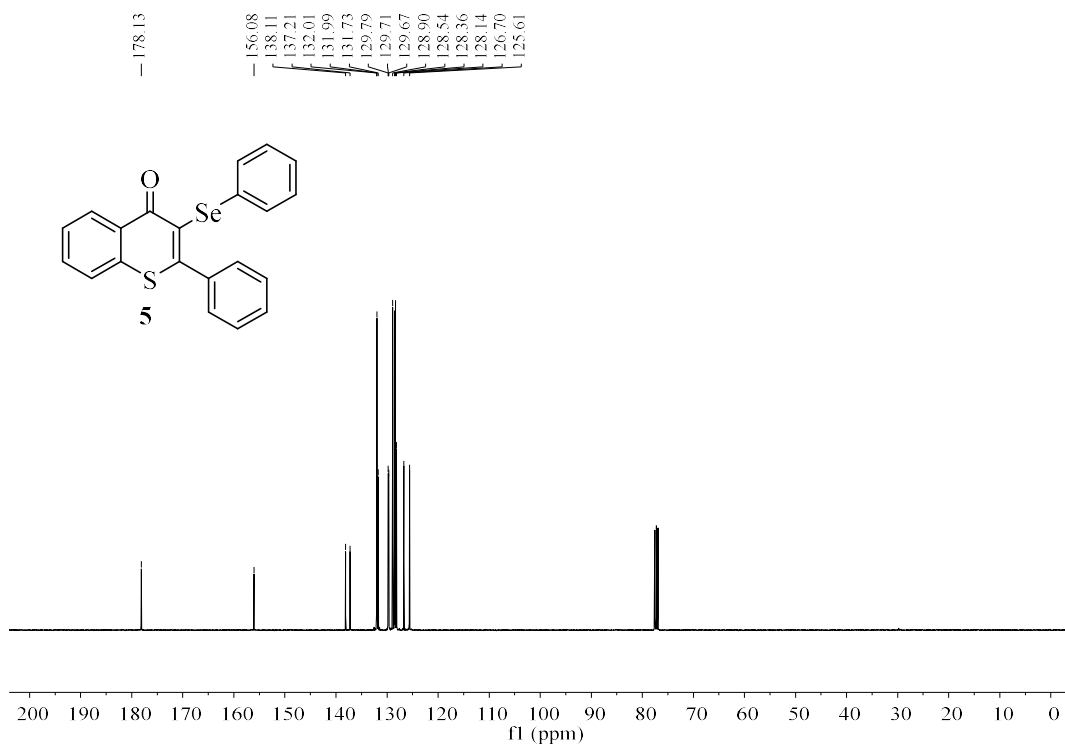

**Figure S106**  $^{13}\text{C}$  NMR (100 MHz) spectrum of **5** in  $\text{CDCl}_3$

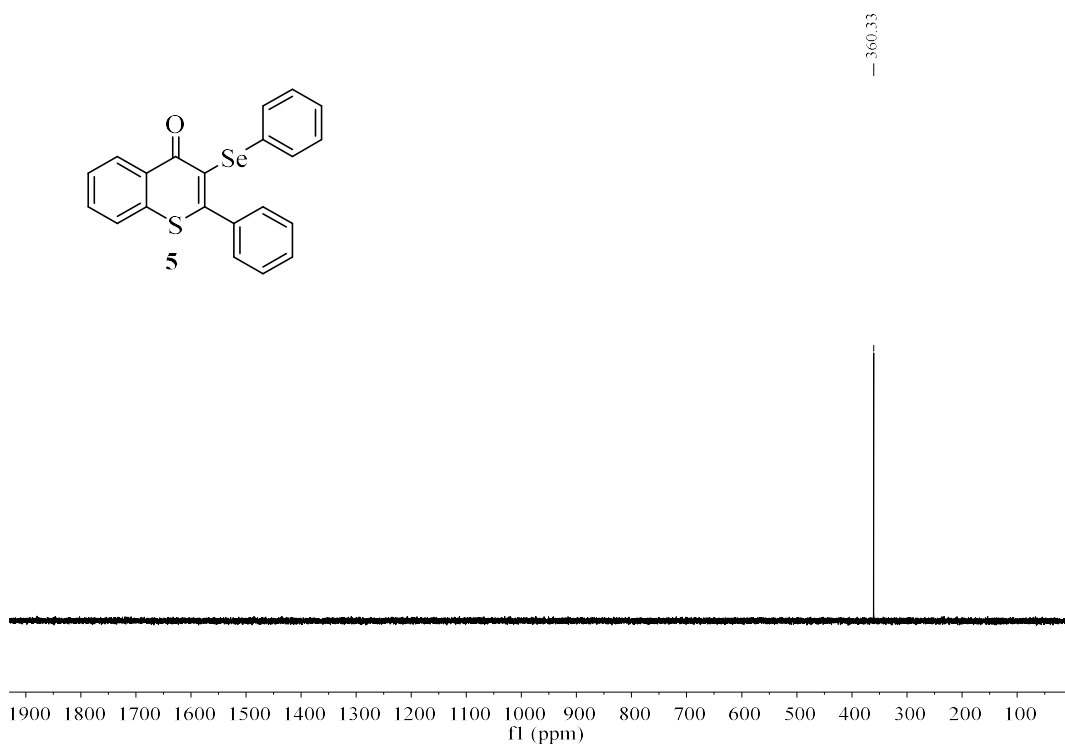

**Figure S107**  $^{77}\text{Se}$  NMR (95.5 MHz) spectrum of **5** in  $\text{CDCl}_3$
